# Supplementary material
Source: publisher figshare collection journal article supplement (https://gsajournals.figshare.com/articles/dataset/_/7889747)

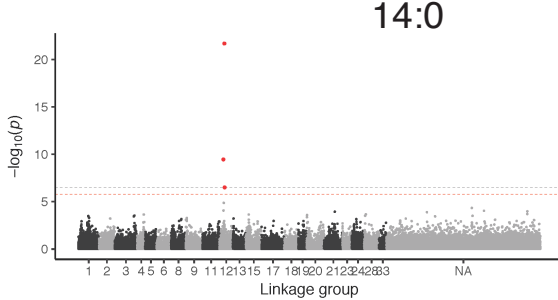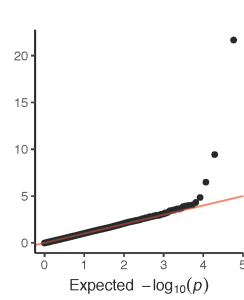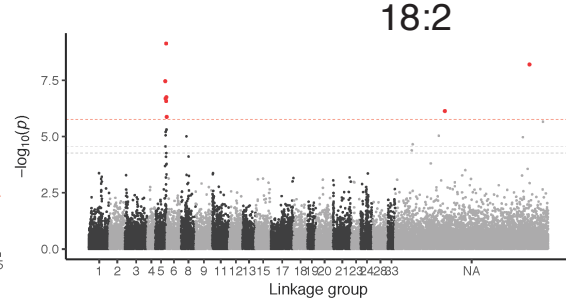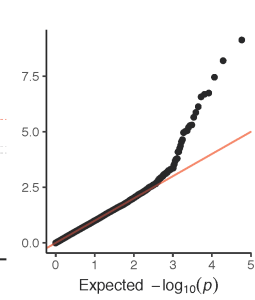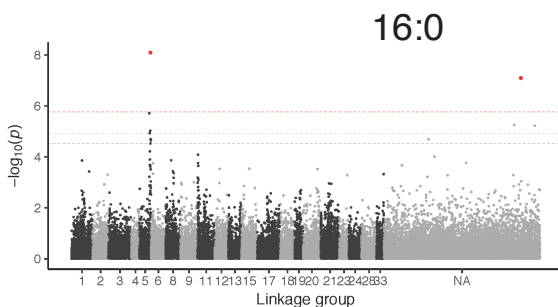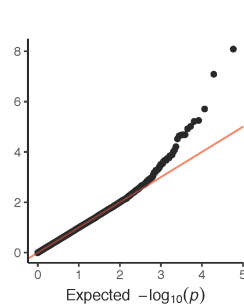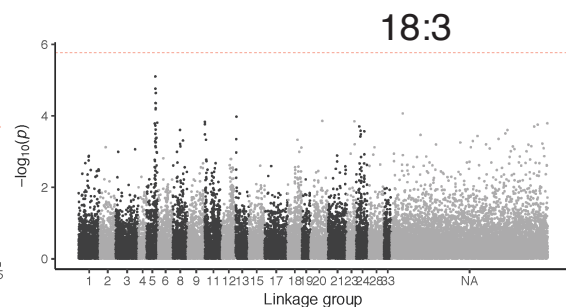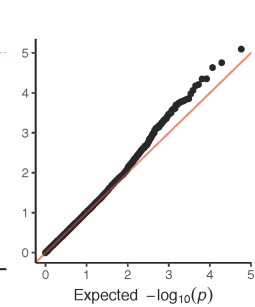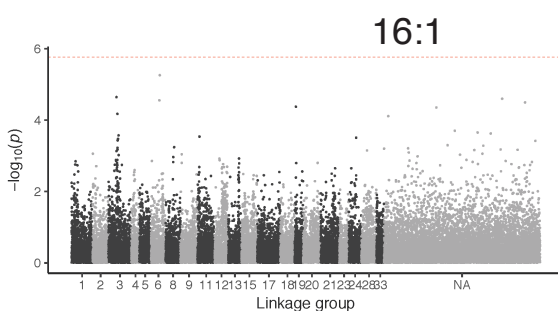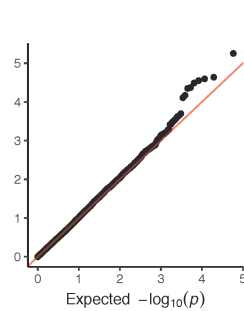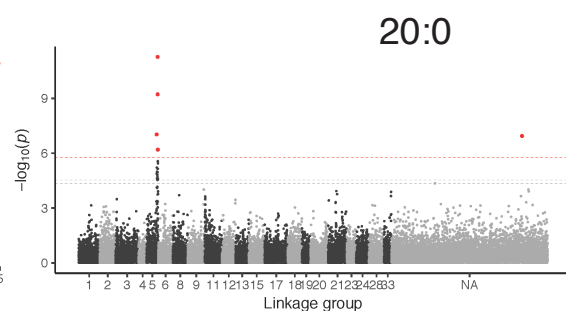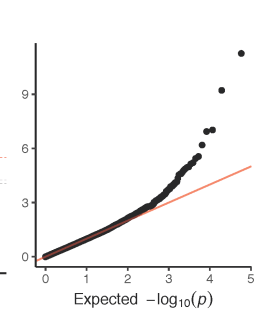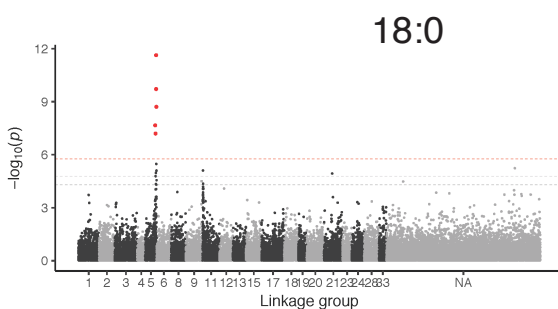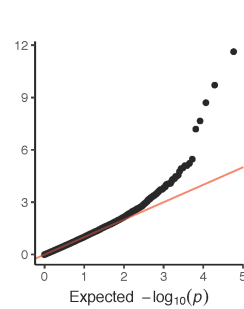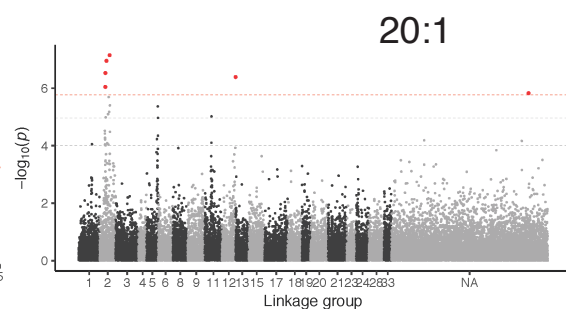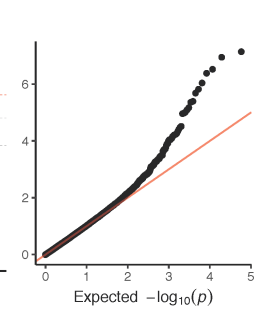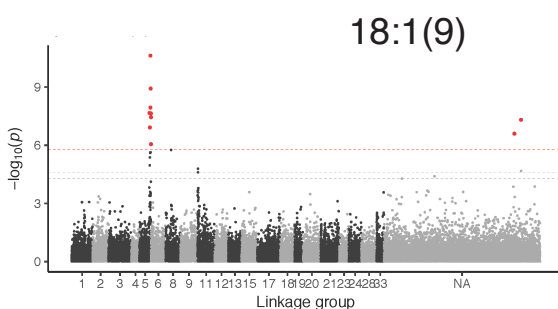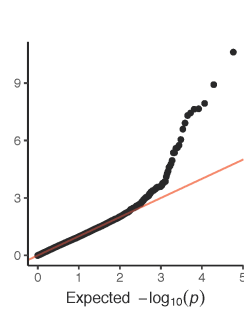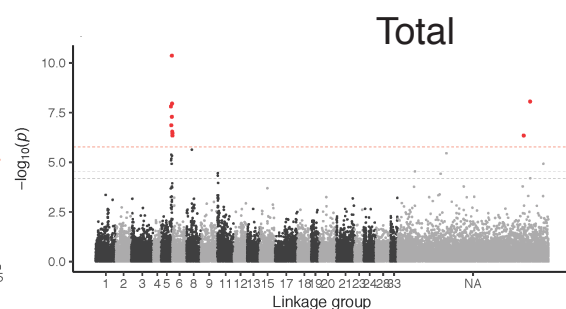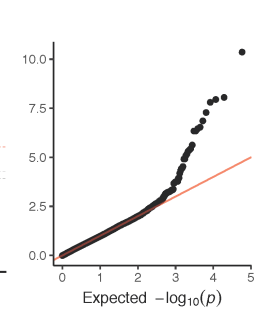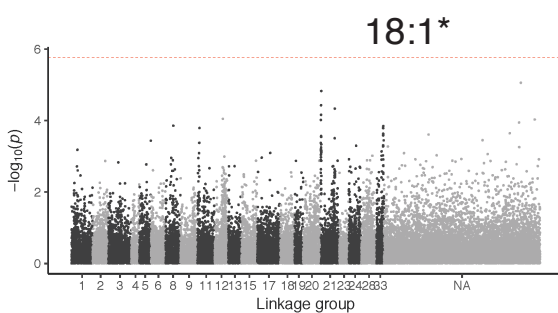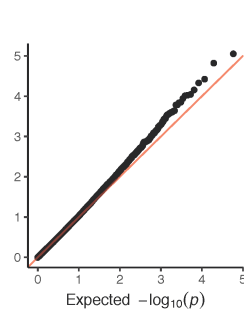

Supplement: Supplementary file [file 1]
