# Supplementary material
Source: publisher figshare collection journal article supplement (https://gsajournals.figshare.com/articles/dataset/_/7889747)

avgbs2\_47308.1.49 – MrgNA

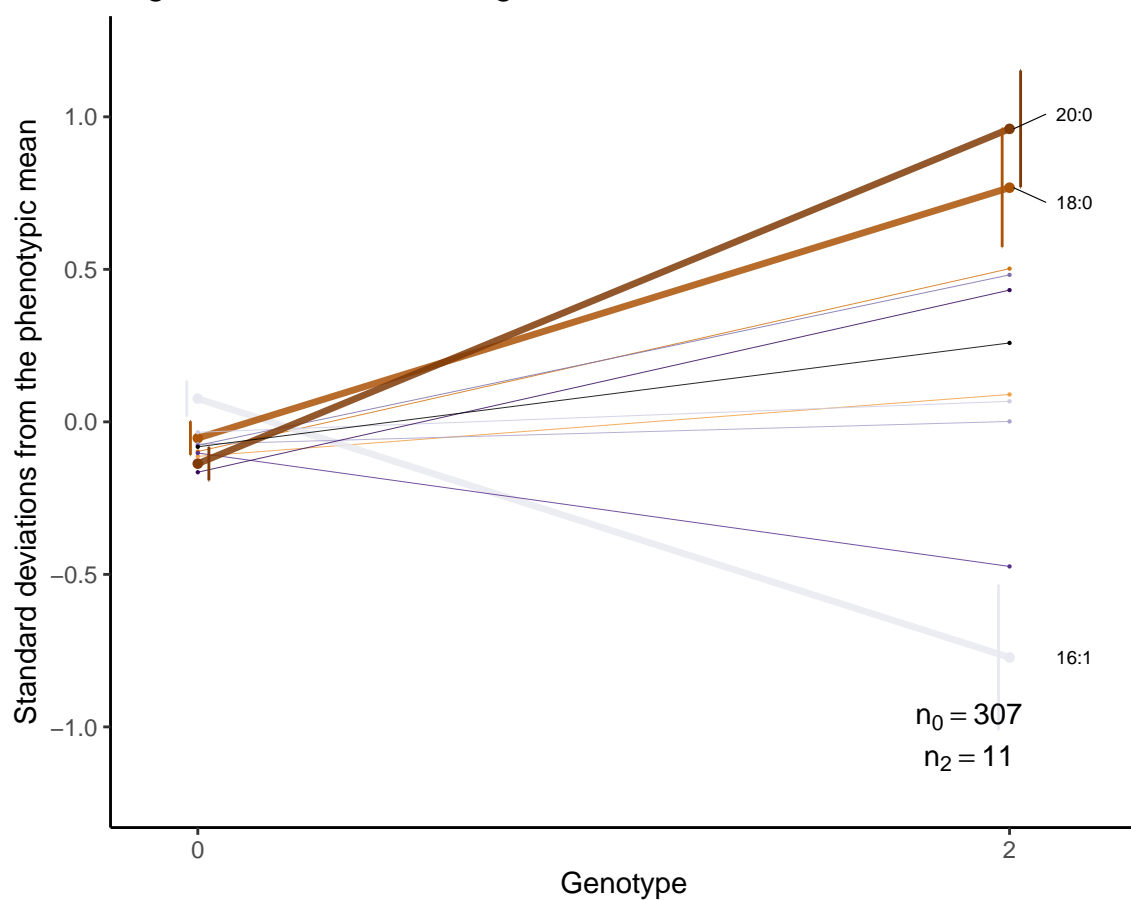

avgbs\_cluster\_39790.1.62 – MrgNA

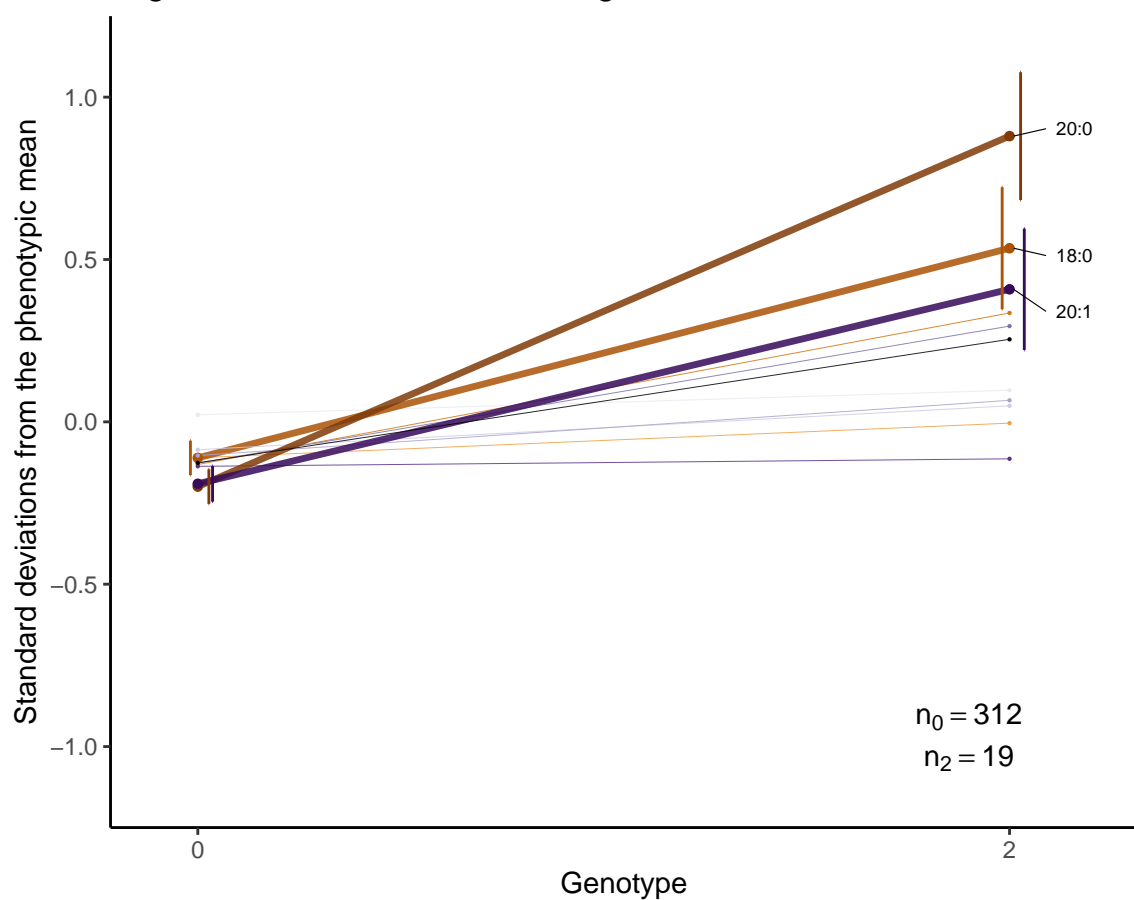

avgbs\_cluster\_21892.1.25 – MrgNA

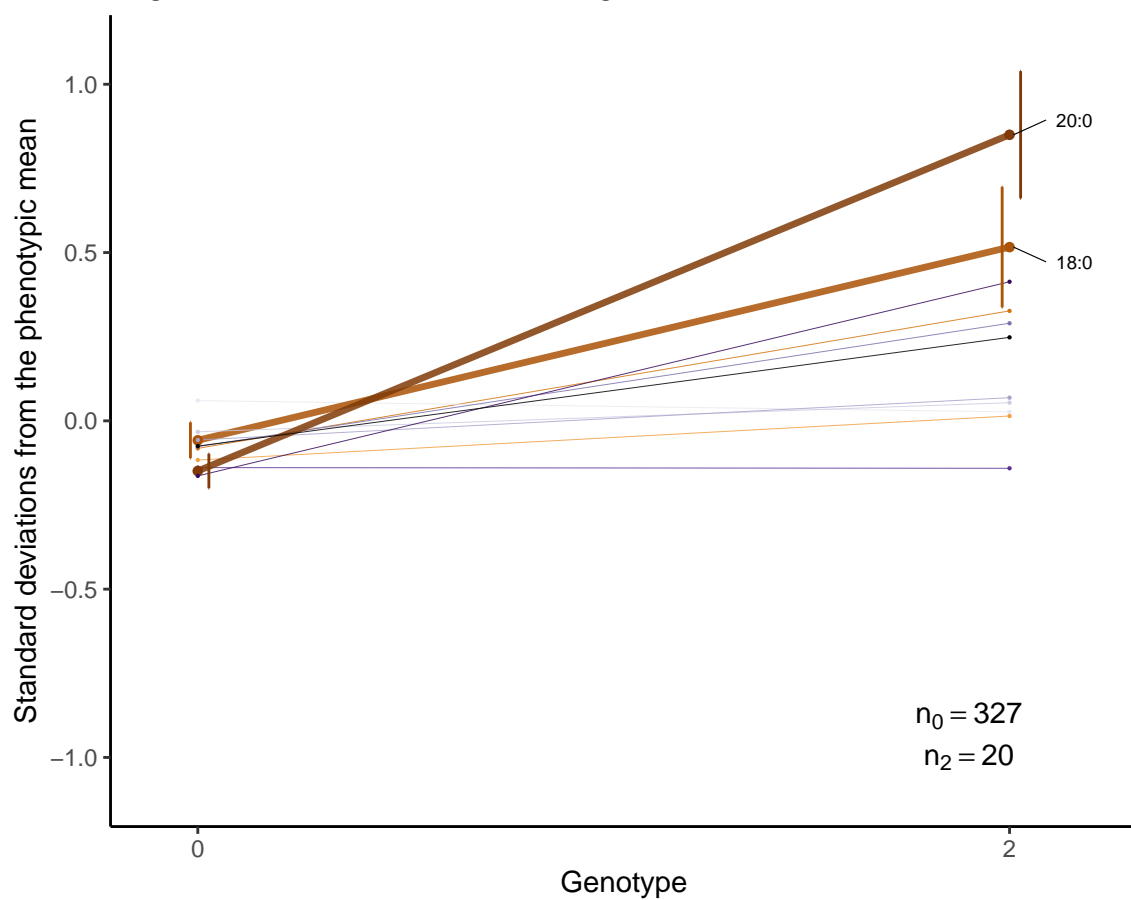

avgbs\_cluster\_36674.1.51 – MrgNA

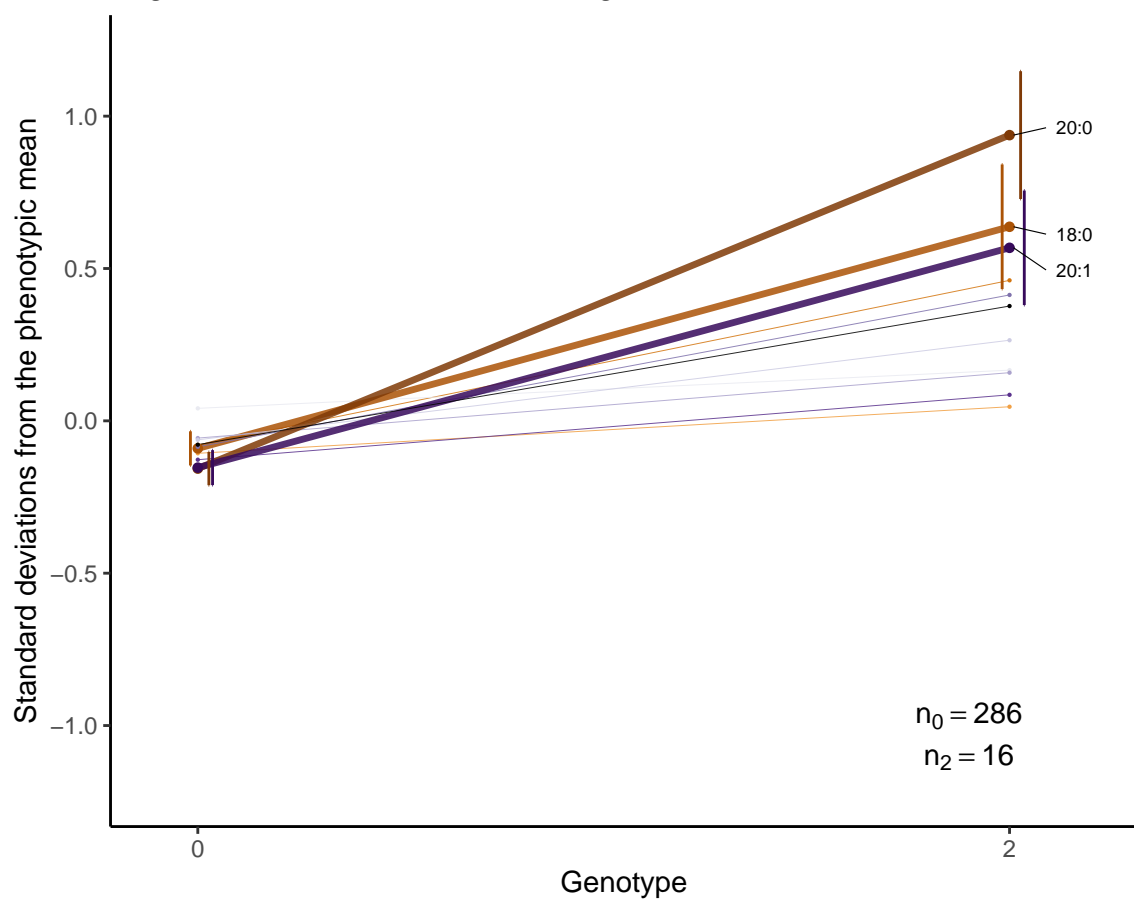

avgbs\_cluster\_9515.1.8 – MrgNA

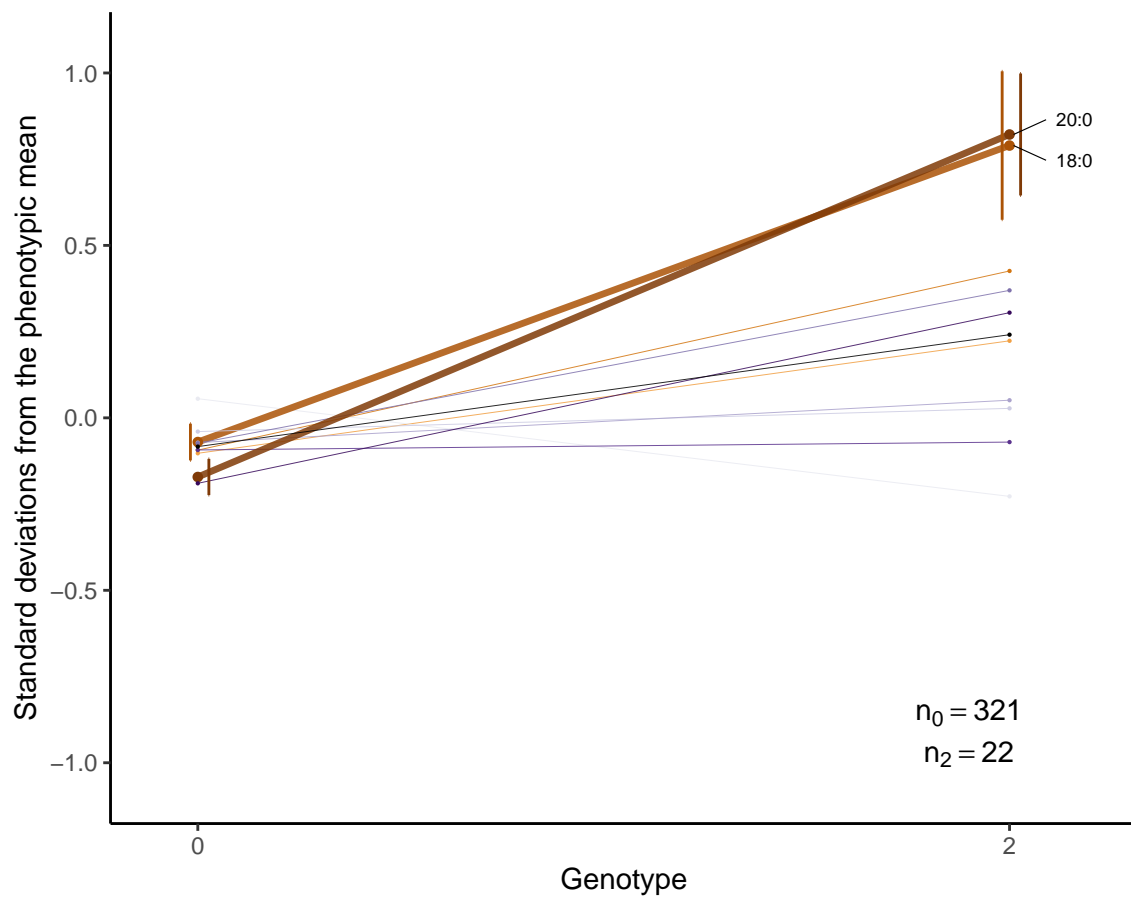

avgbs2\_167611.1.12 – MrgNA

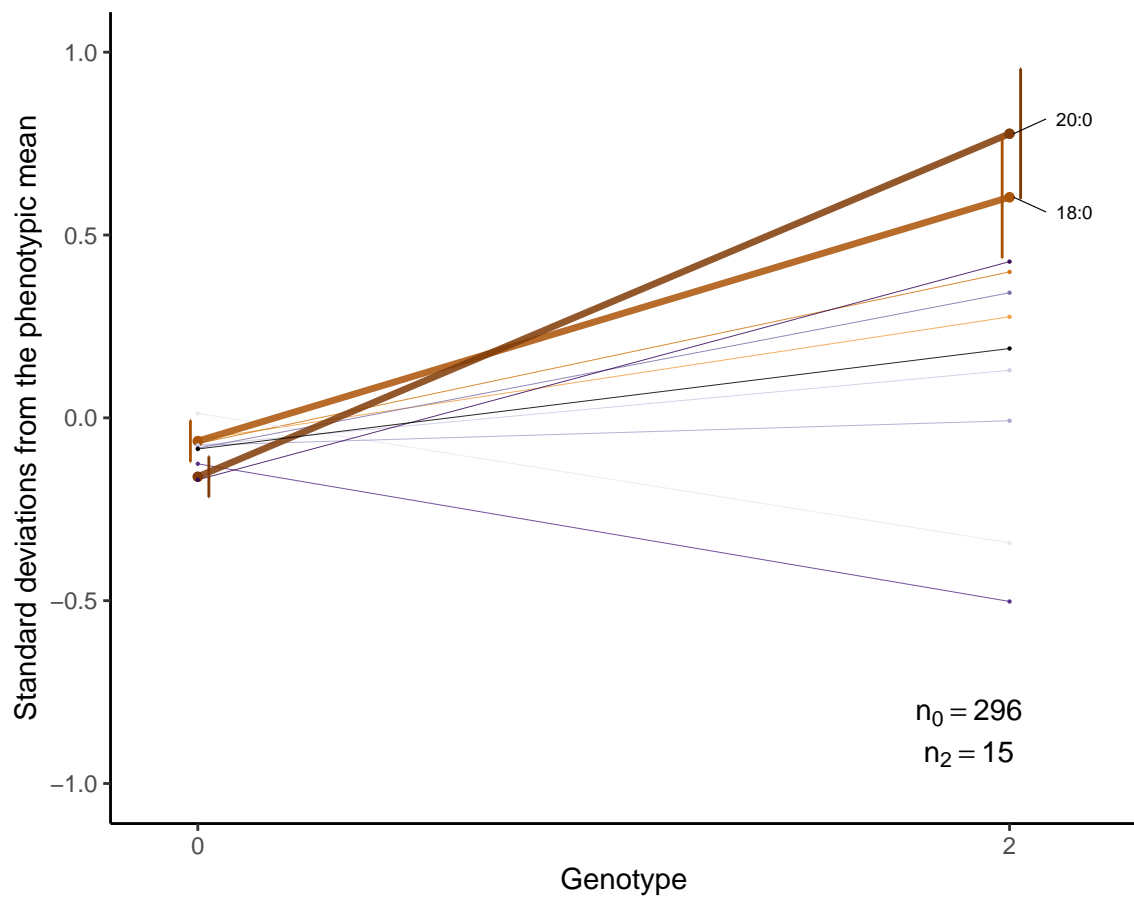

avgbs\_cluster\_36123.1.10 – Mrg02

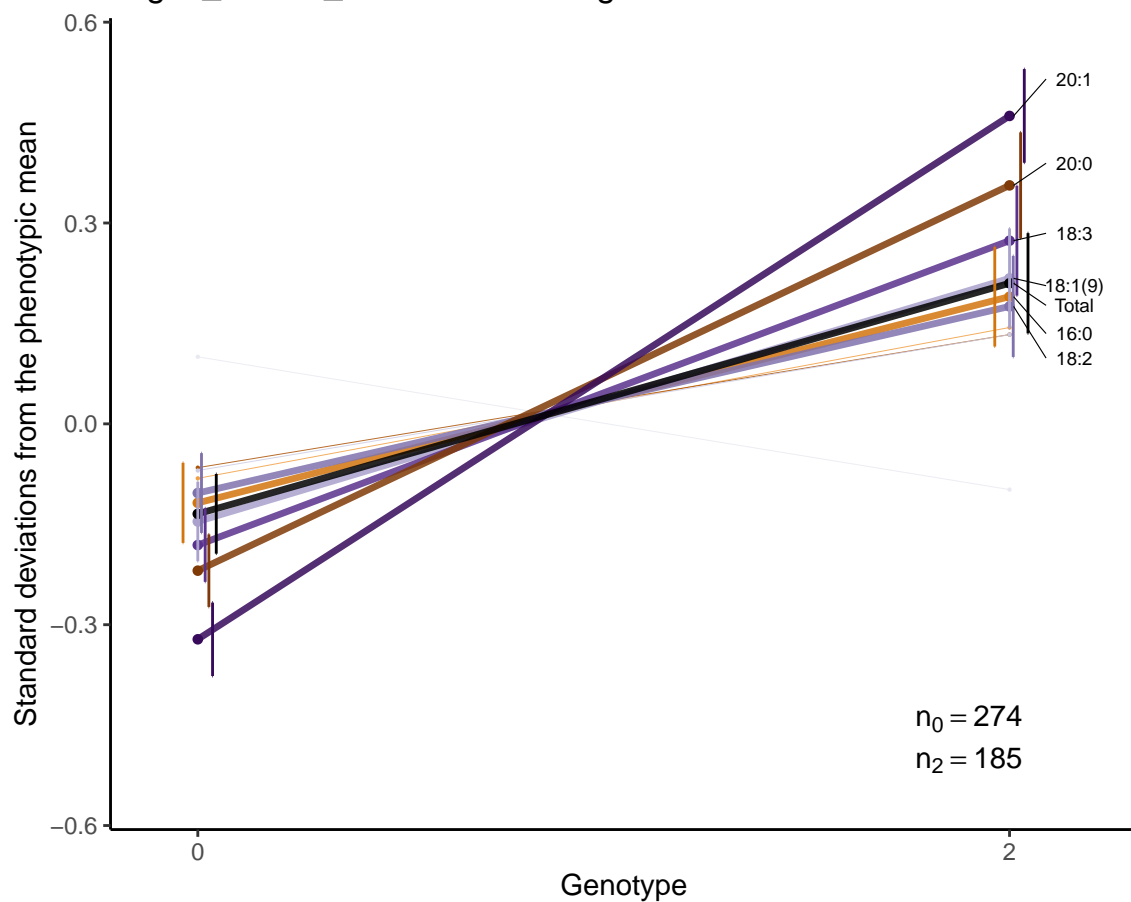

avgbs2\_172900.1.15 – Mrg02

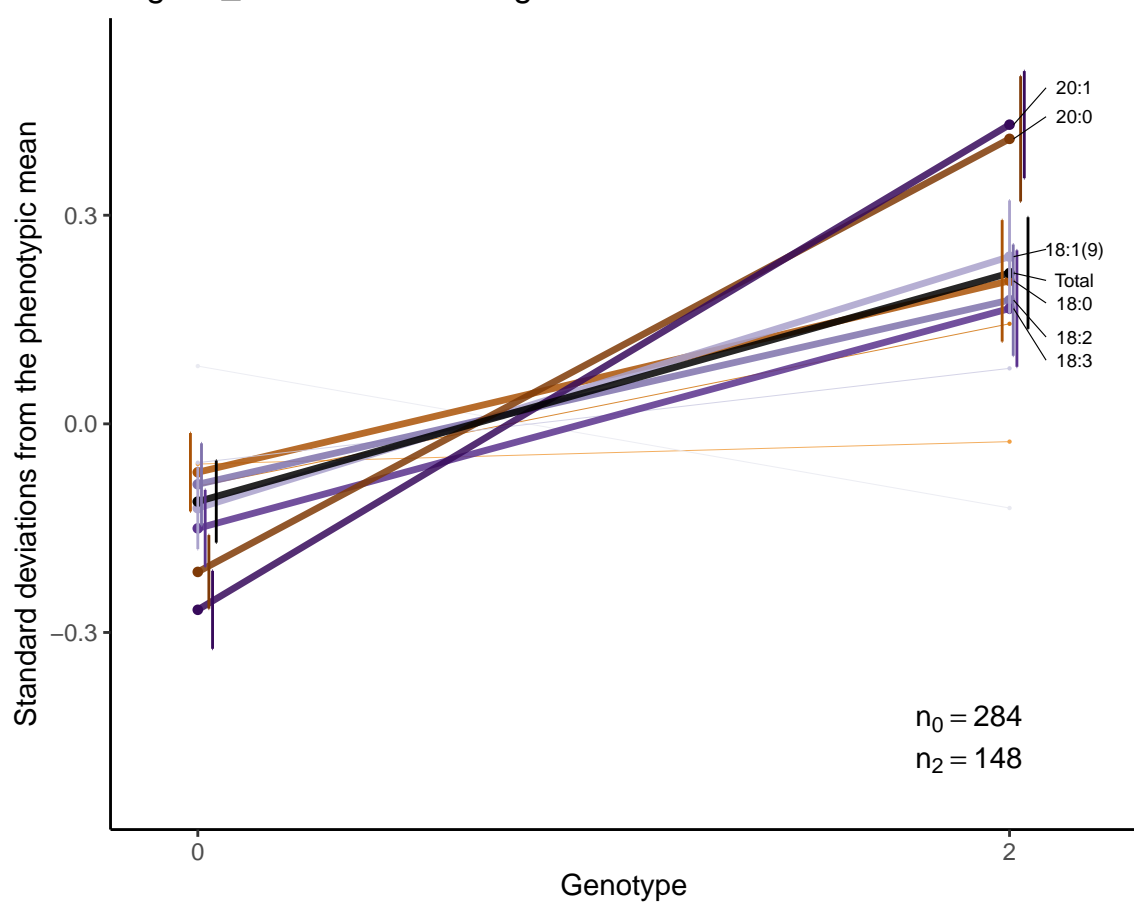

avgbs\_22645.1.42 – Mrg02

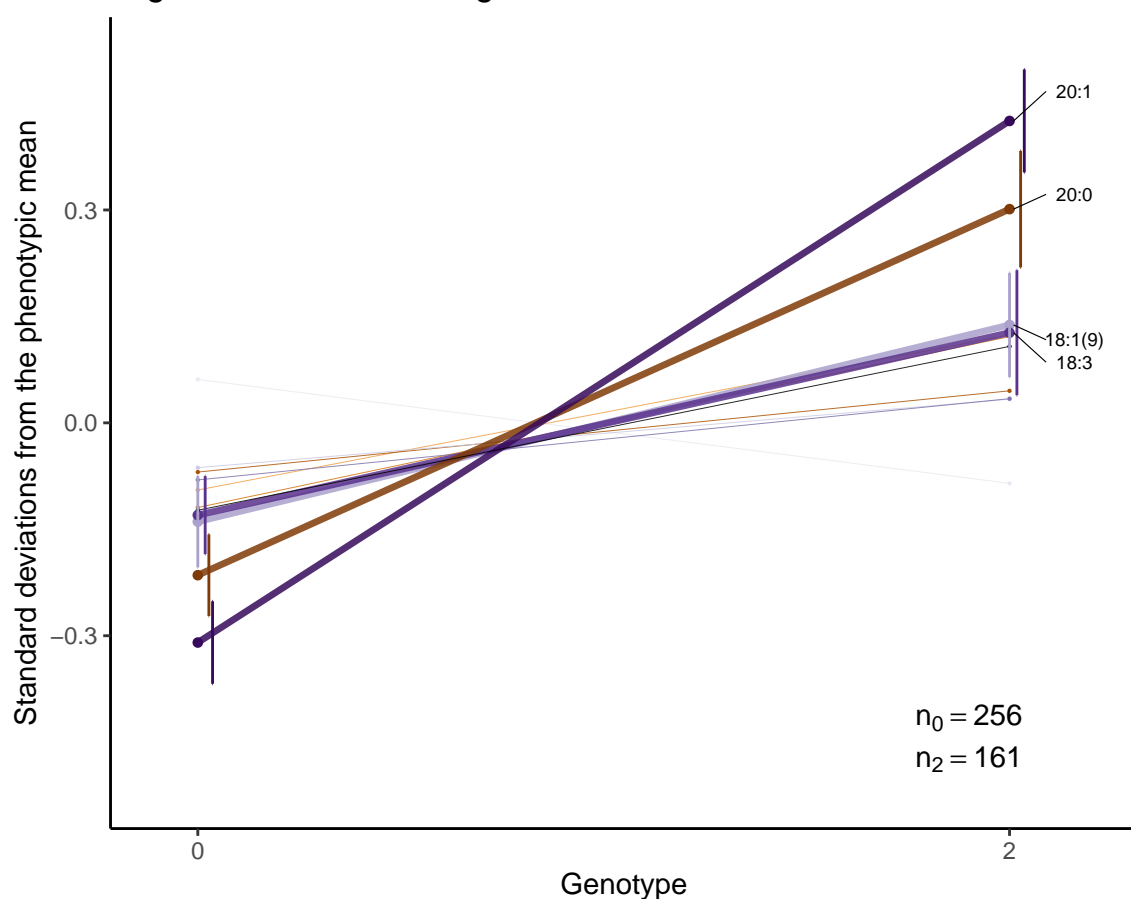

avgbs\_220897.1.7 – Mrg02

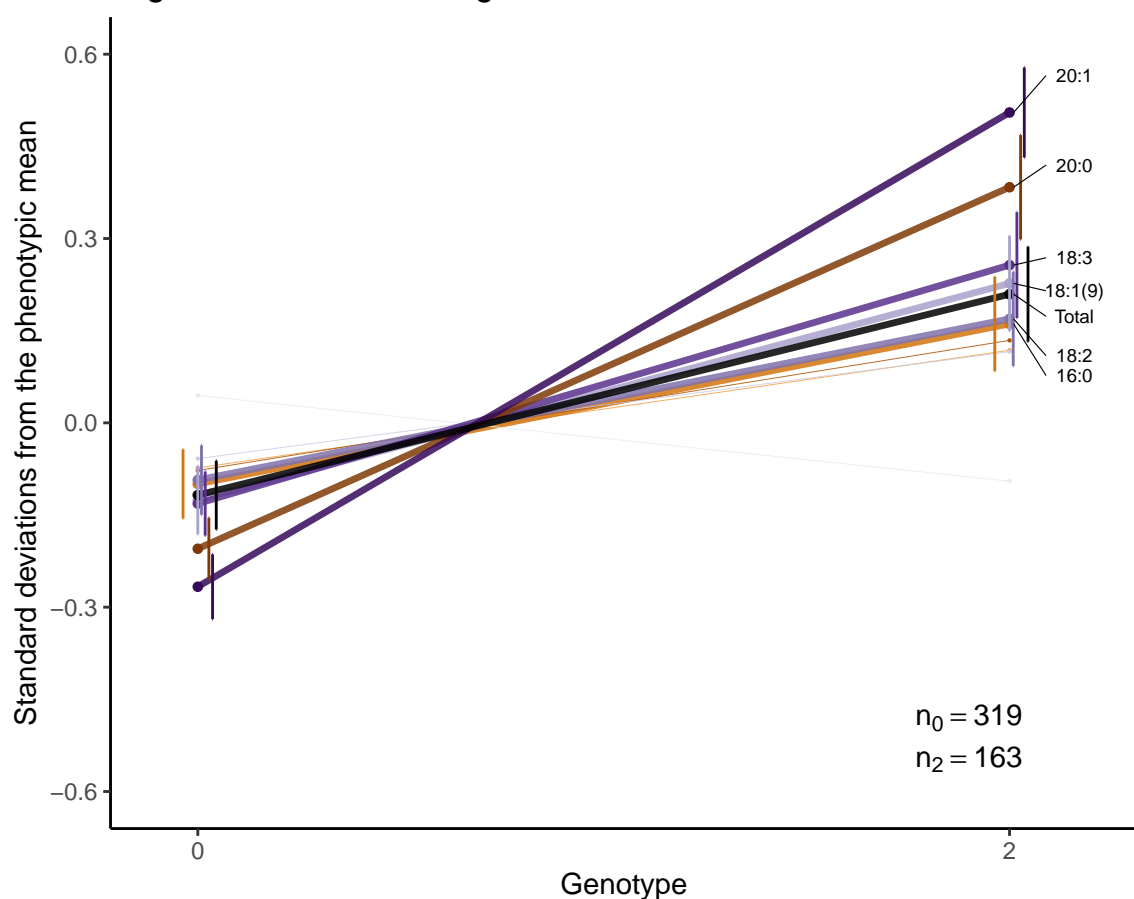

avgbs\_92071.1.30 – Mrg02

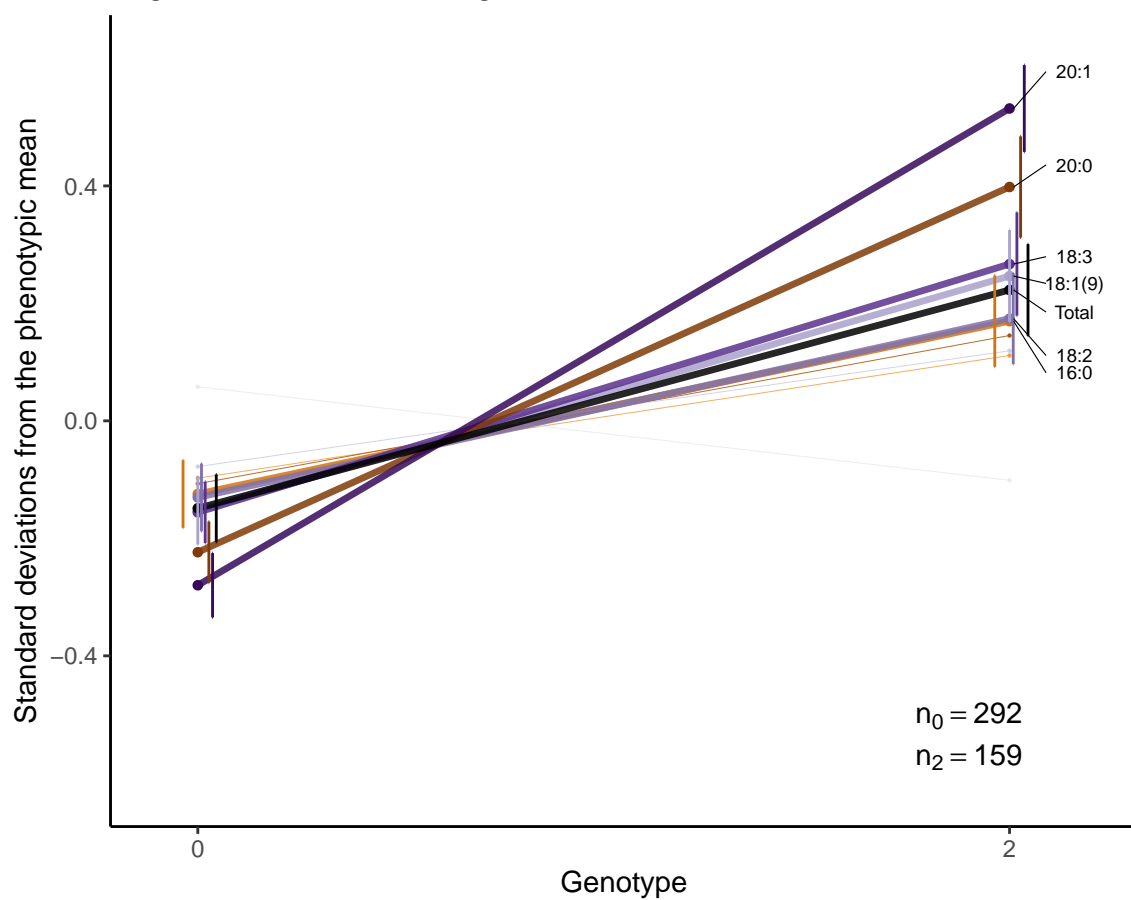

avgbs2\_5497.1.39 – Mrg02

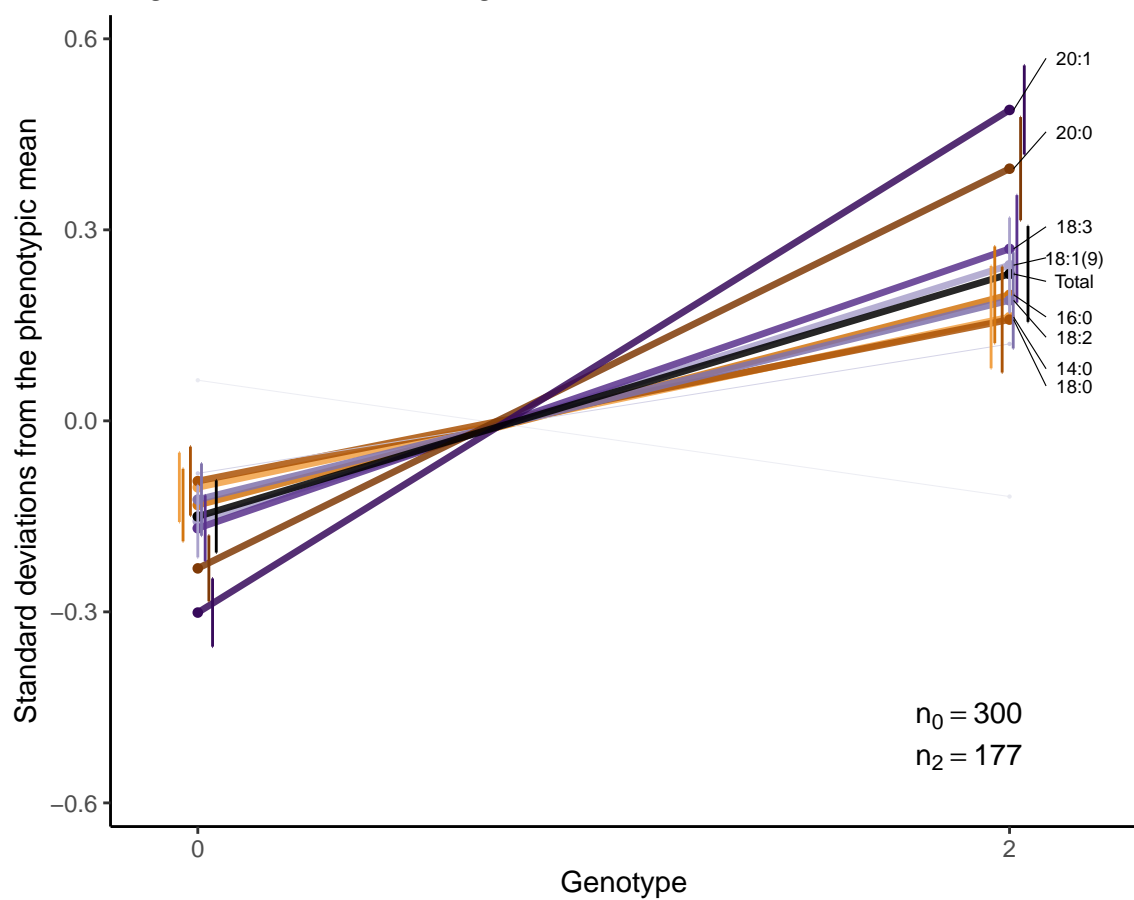

avgbs\_cluster\_14382.1.48 – Mrg02

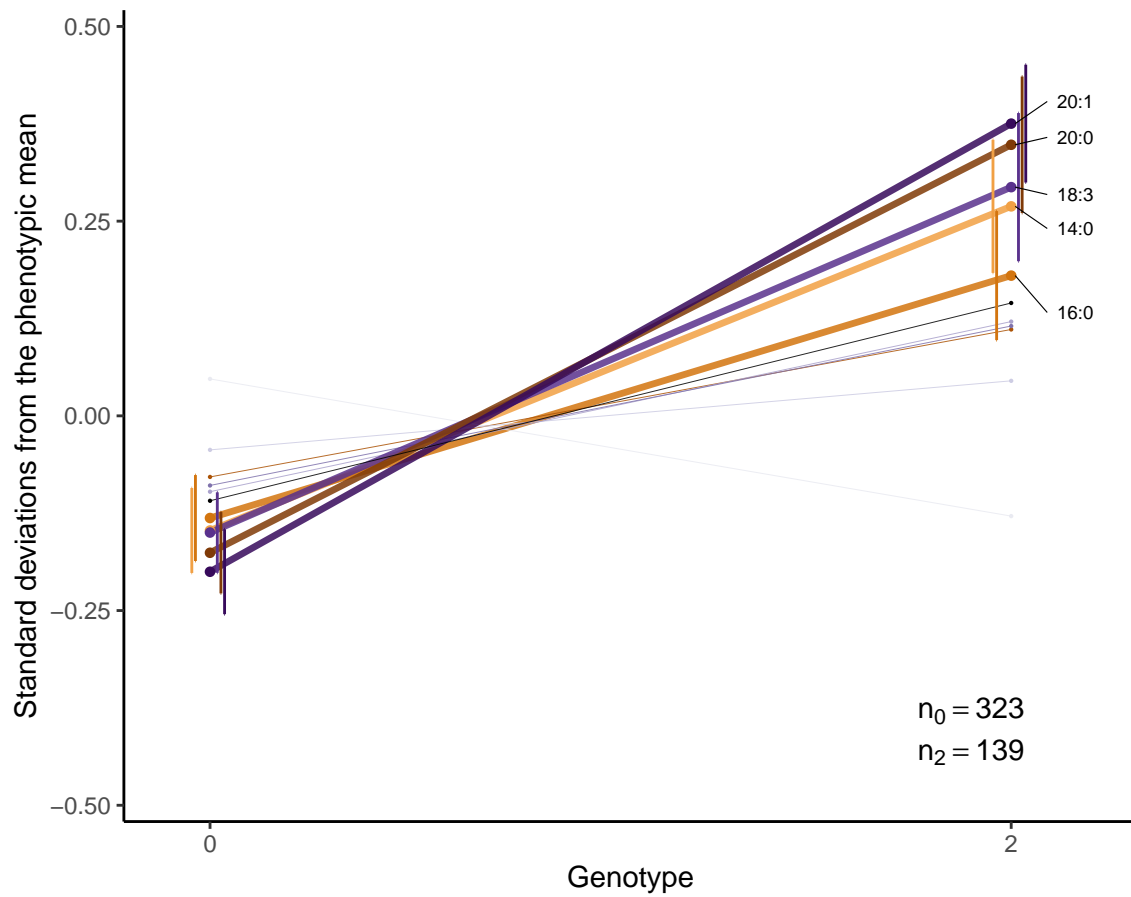

avgbs\_6K\_107668.1.64 – Mrg02

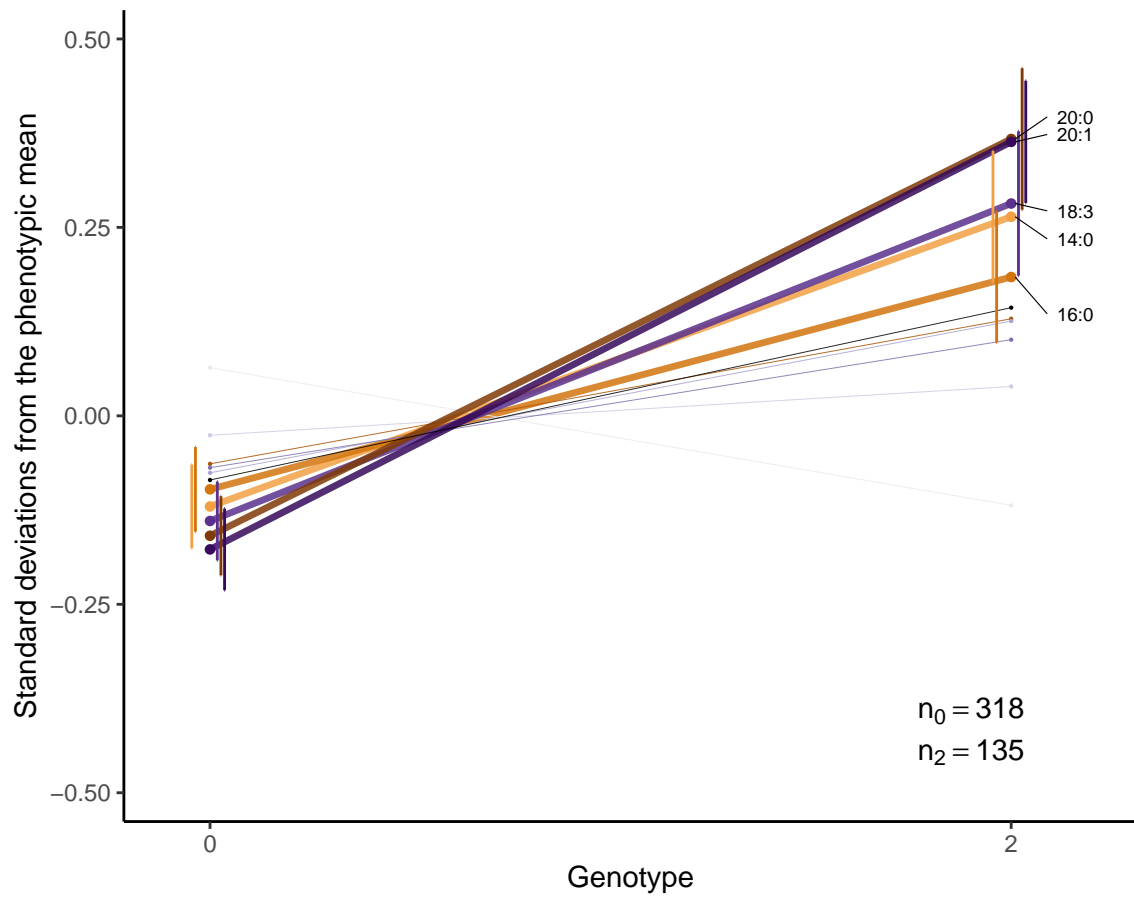

avgbs2\_146607.1.48 – Mrg02

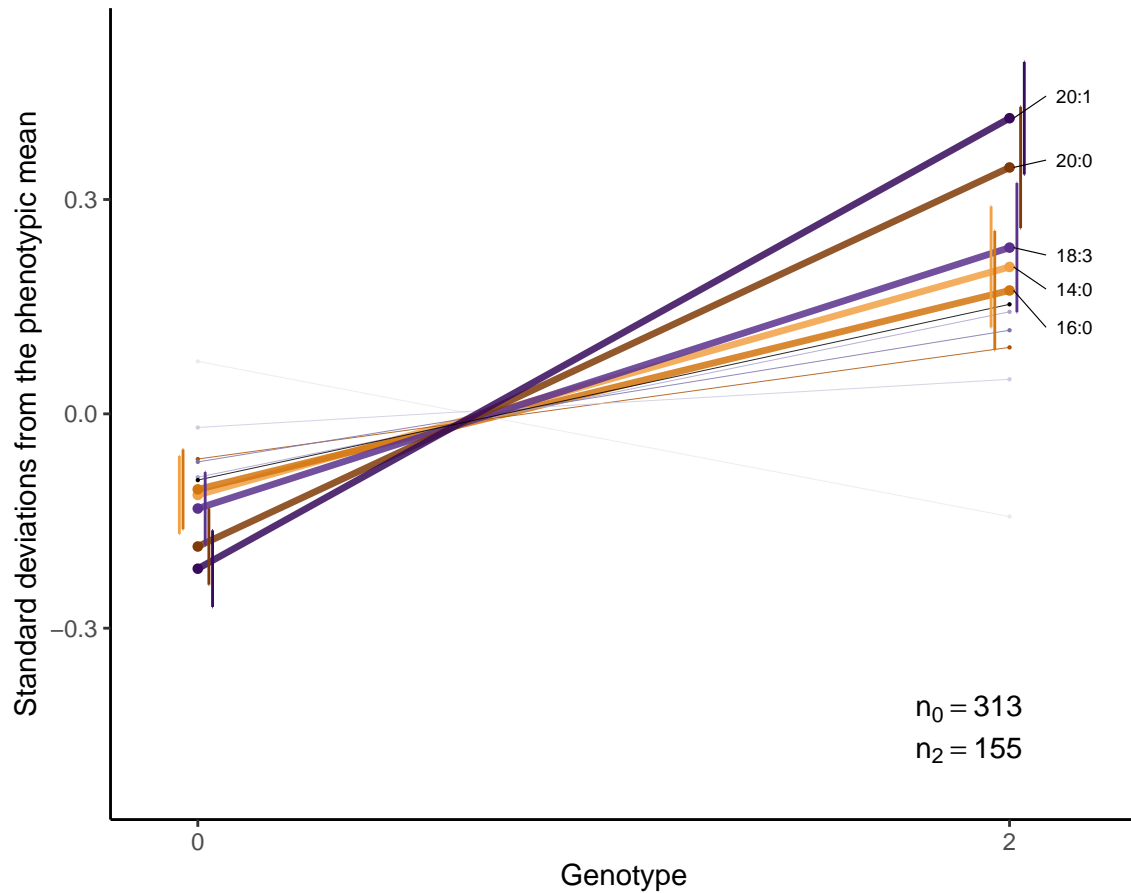

avgbs2\_78335.1.36 – Mrg02

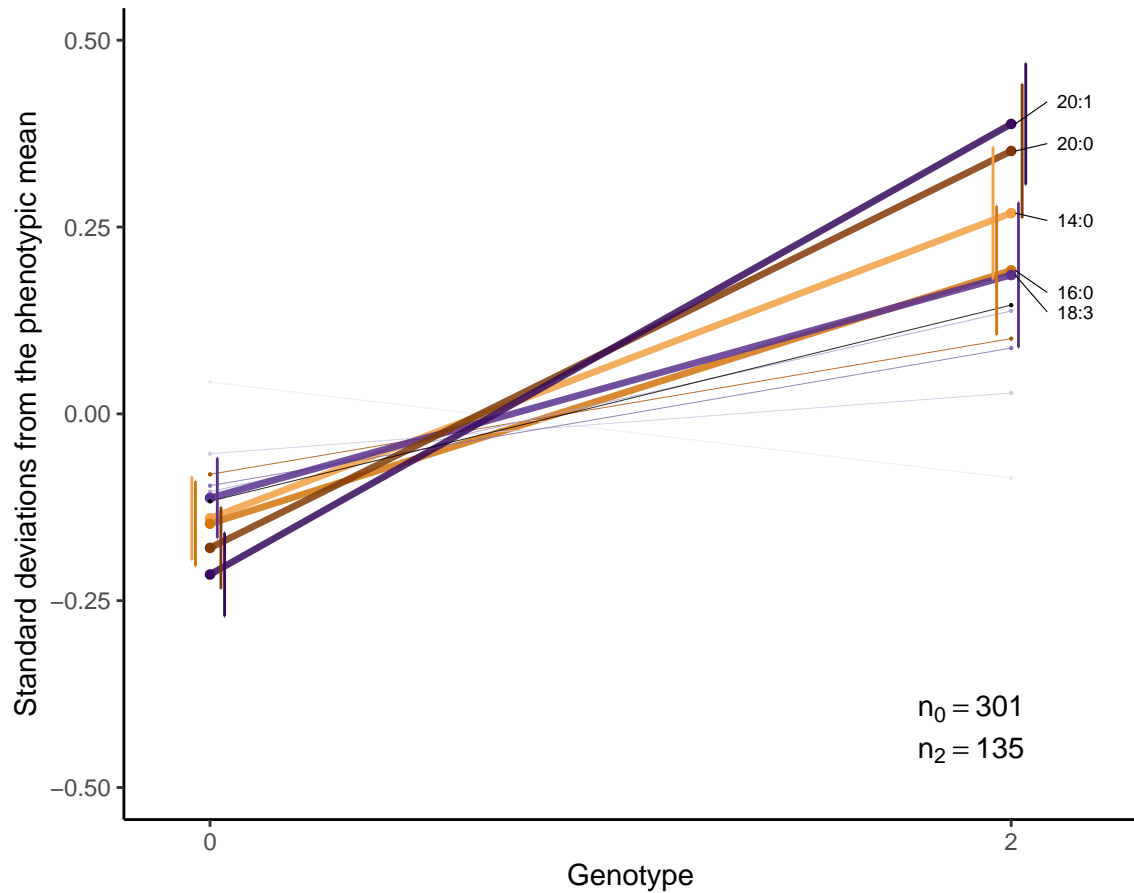

avgbs2\_137183.2.48 – Mrg02

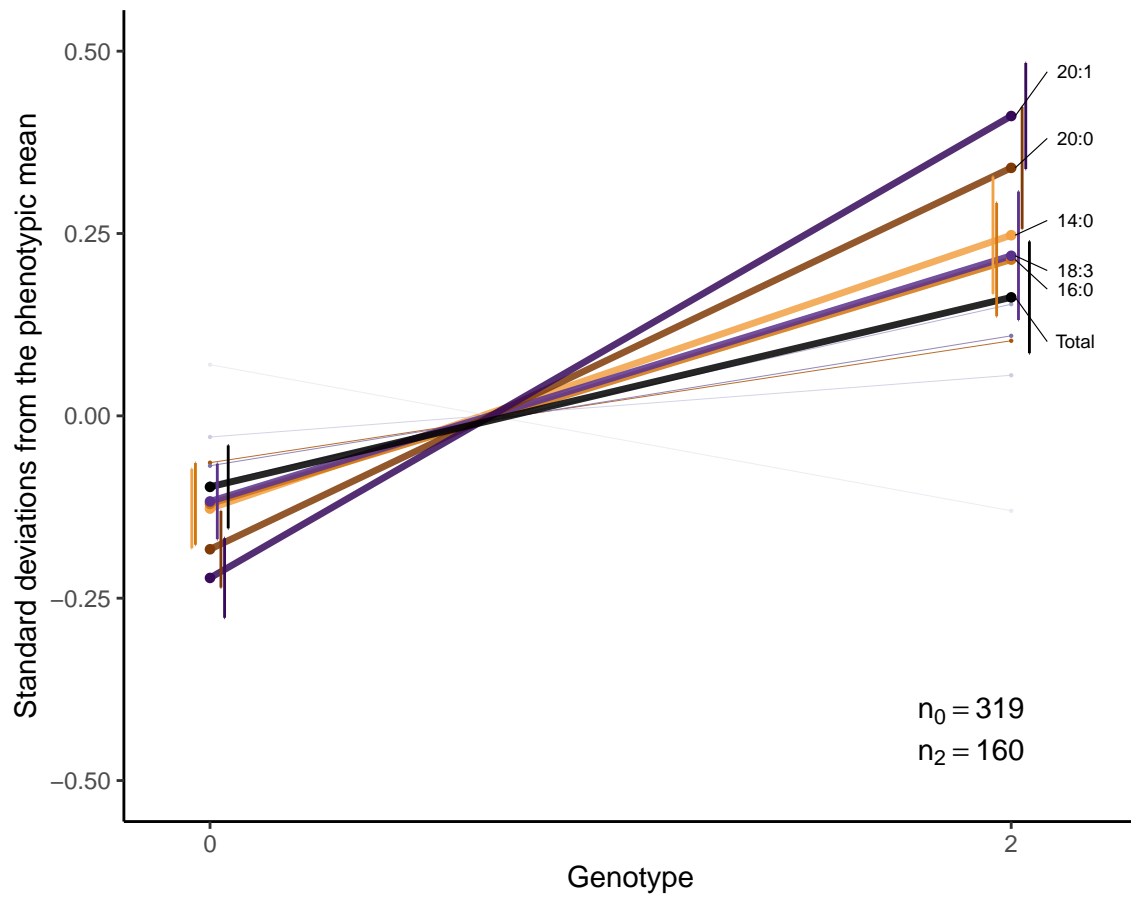

avgbs\_cluster\_30072.1.12 – Mrg02

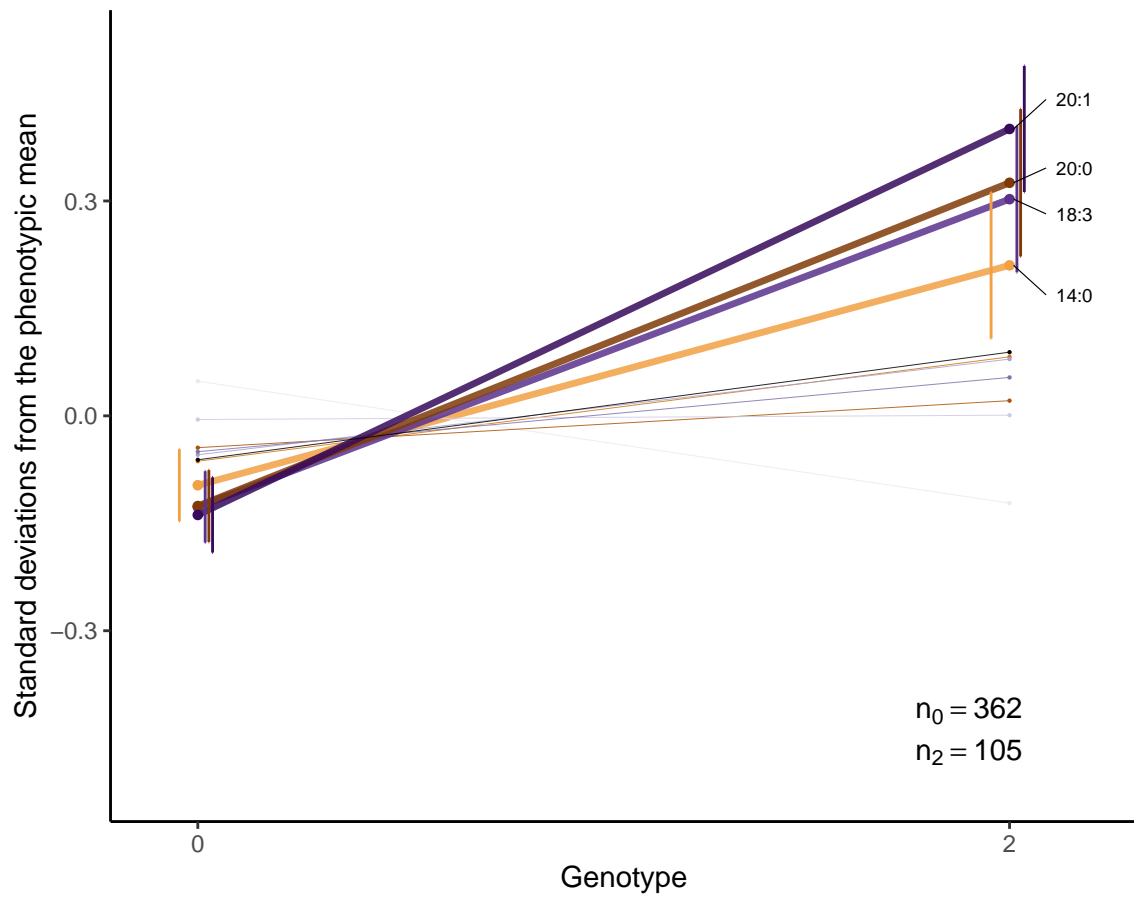

avgbs2\_50181.1.39 – Mrg02

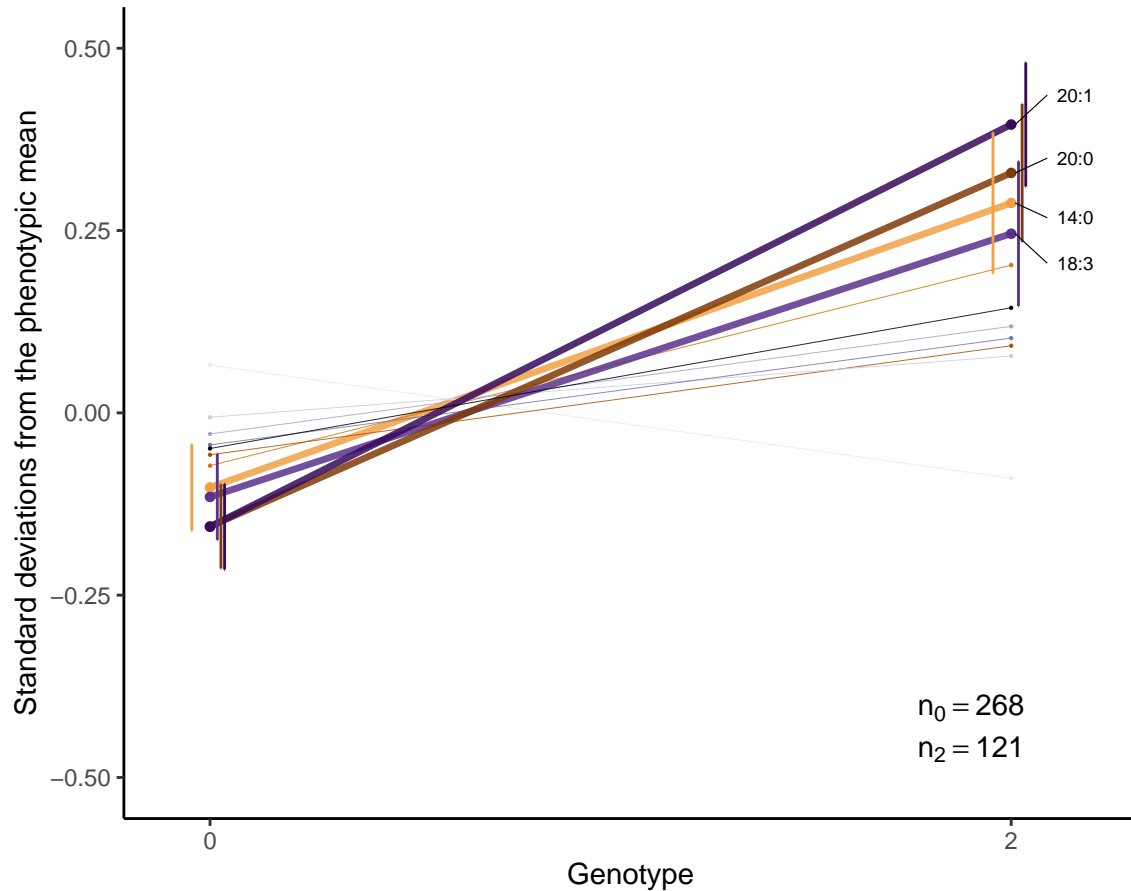

avgbs\_cluster\_1277.1.8 – MrgNA

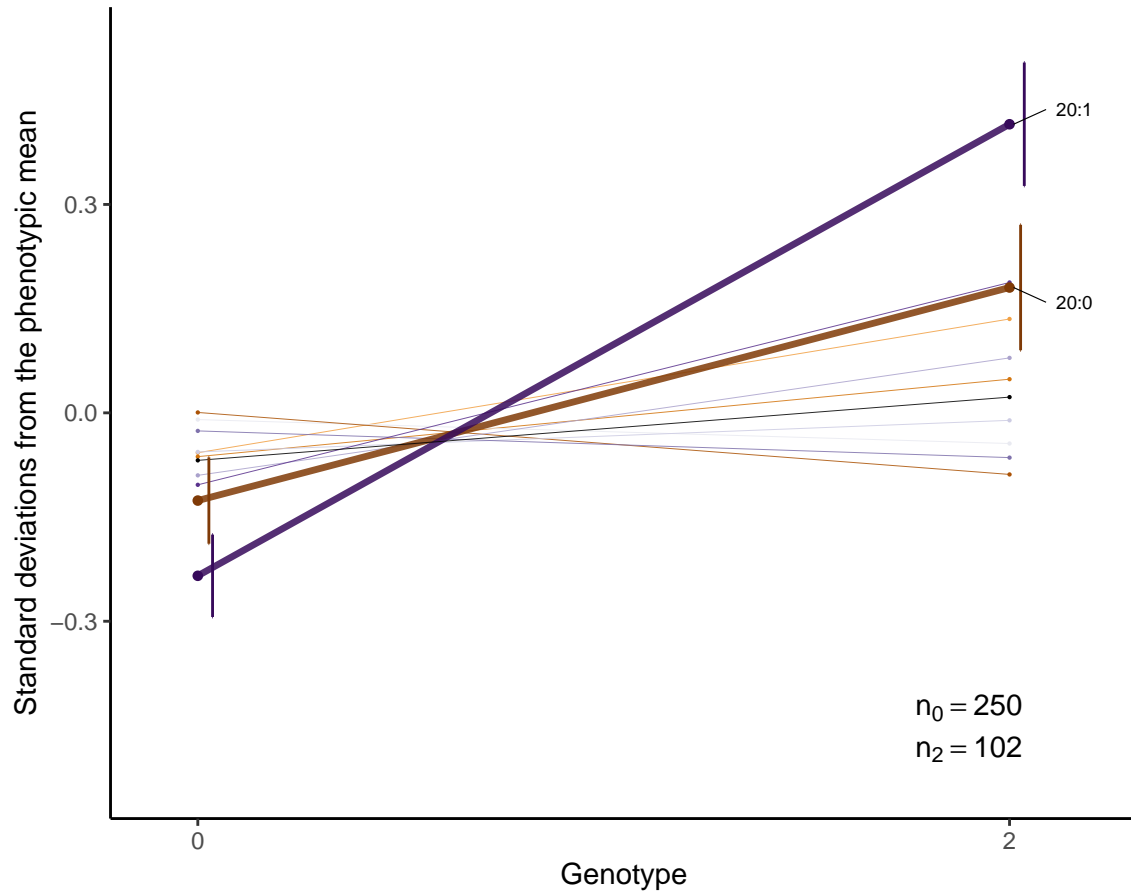

avgbs\_203131.1.27 – Mrg02

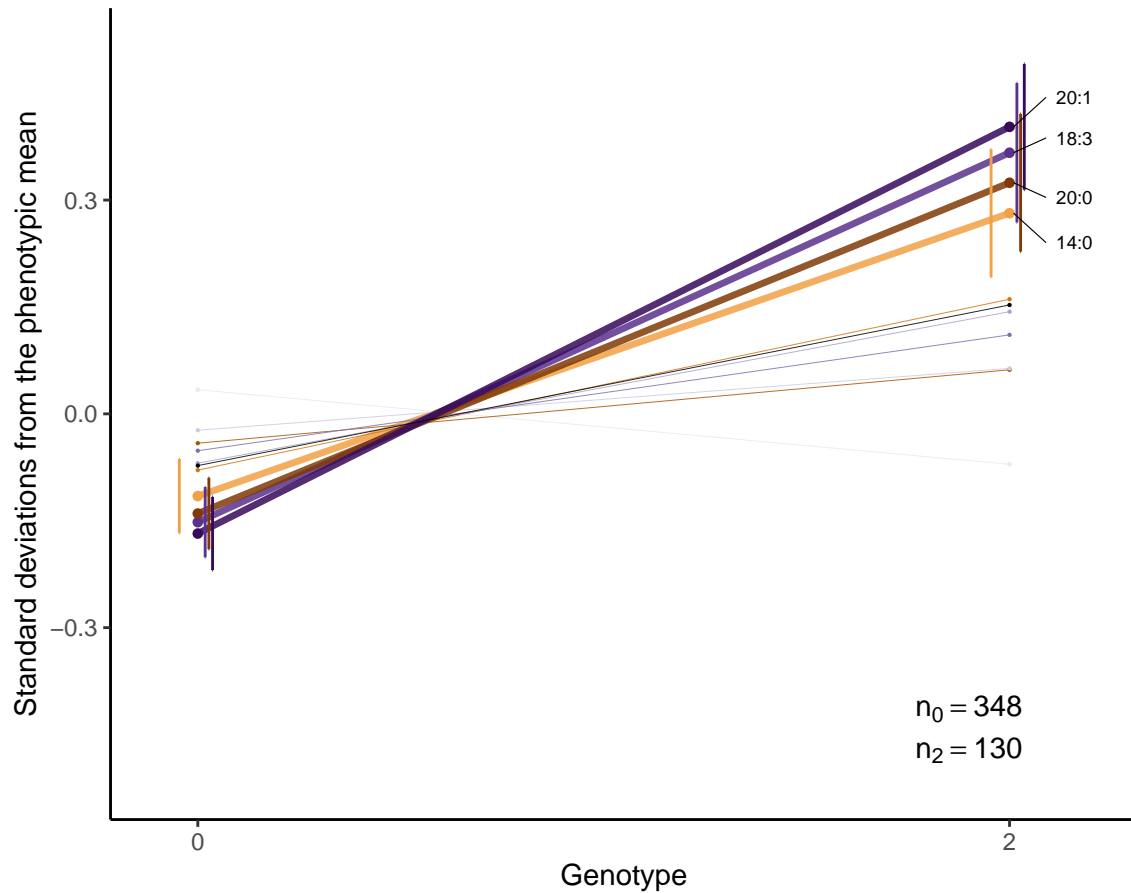

avgbs\_205702.1.11 – Mrg02

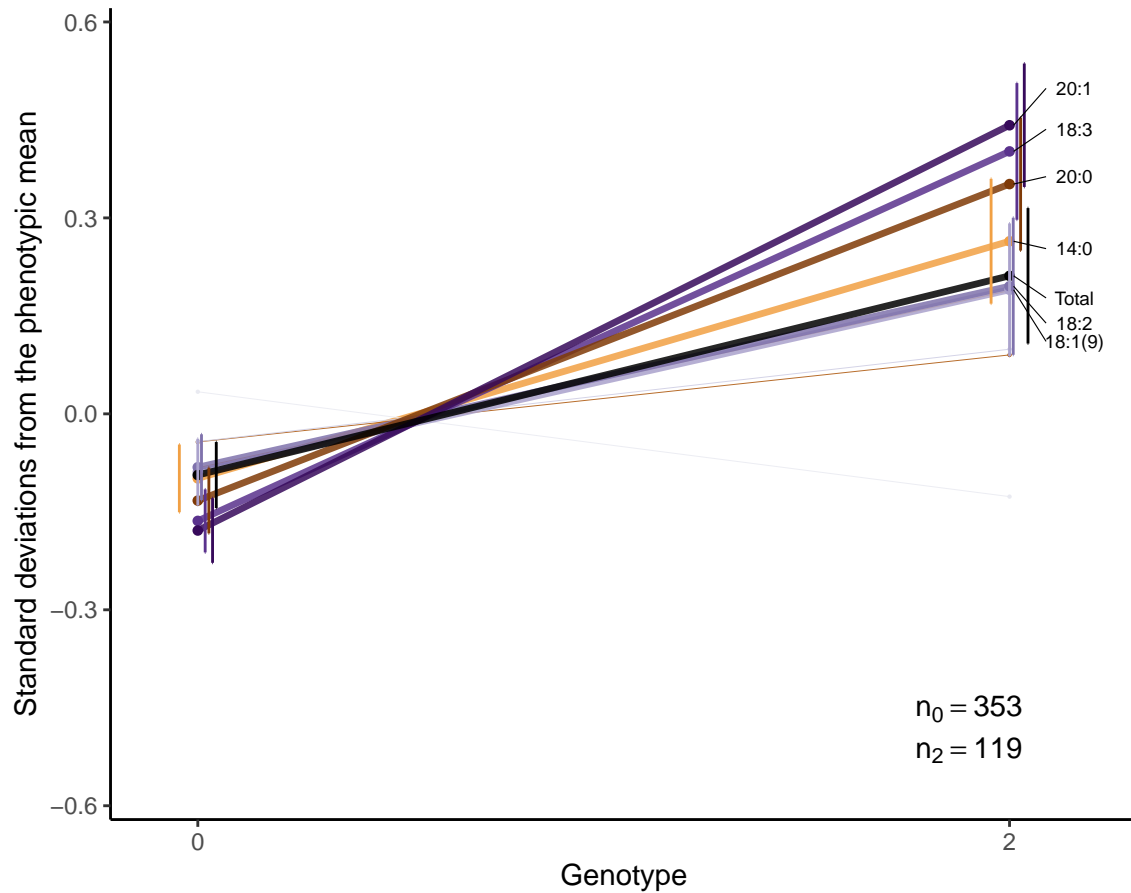

avgbs2\_63578.1.48 – Mrg02

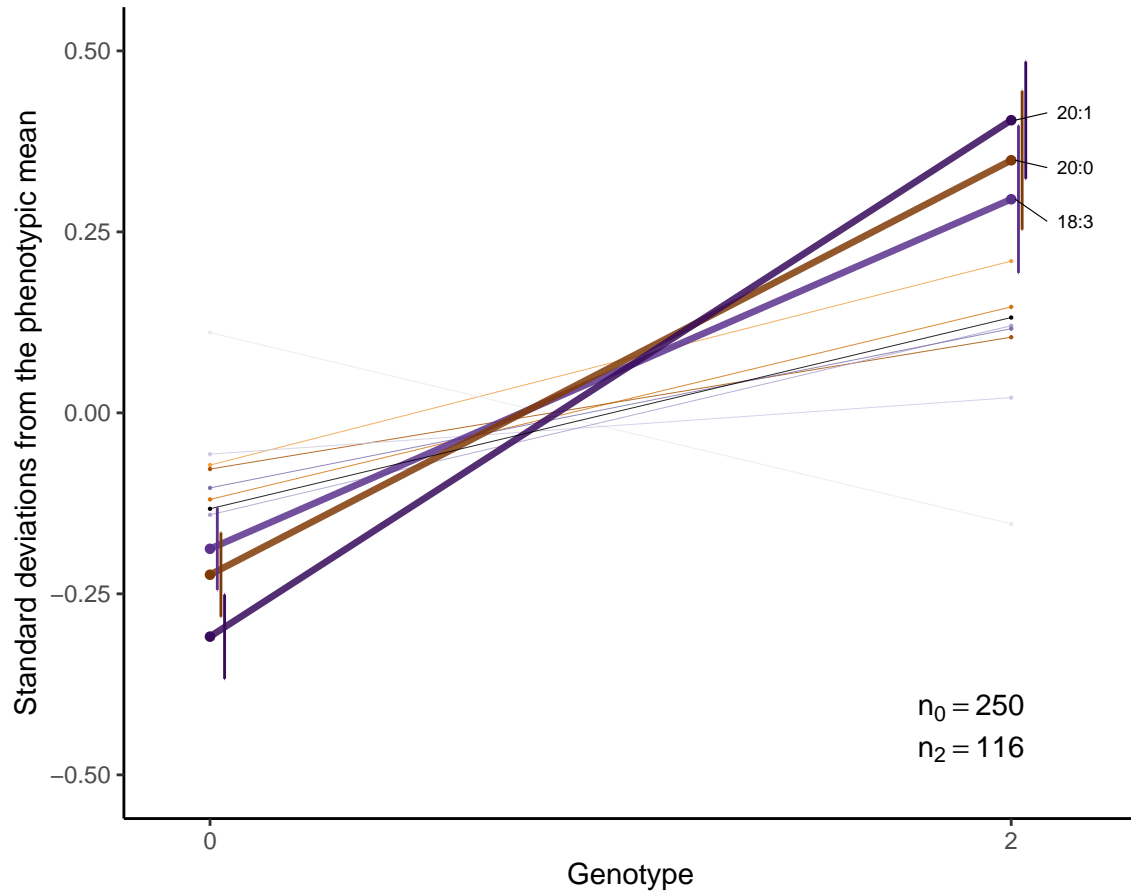

avgbs2\_108825.1.15 – MrgNA

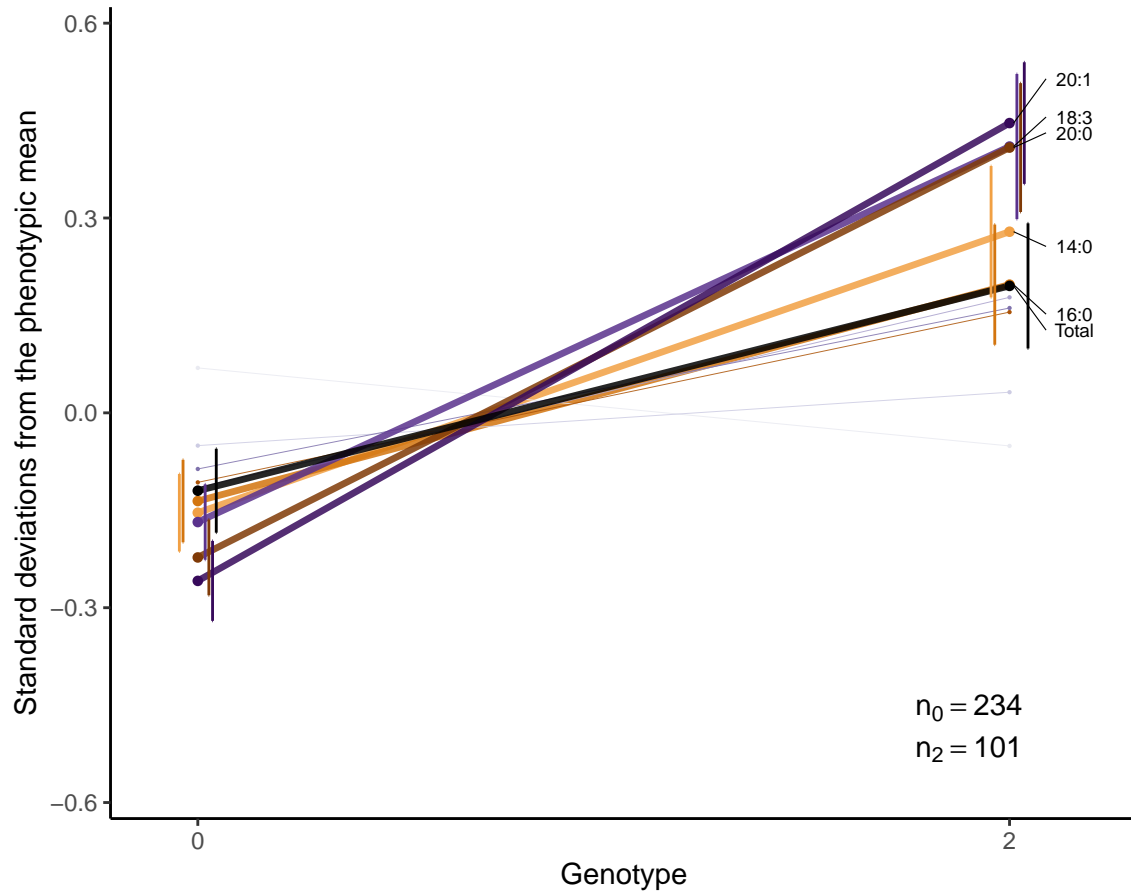

avgbs2\_4147.1.26 – Mrg02

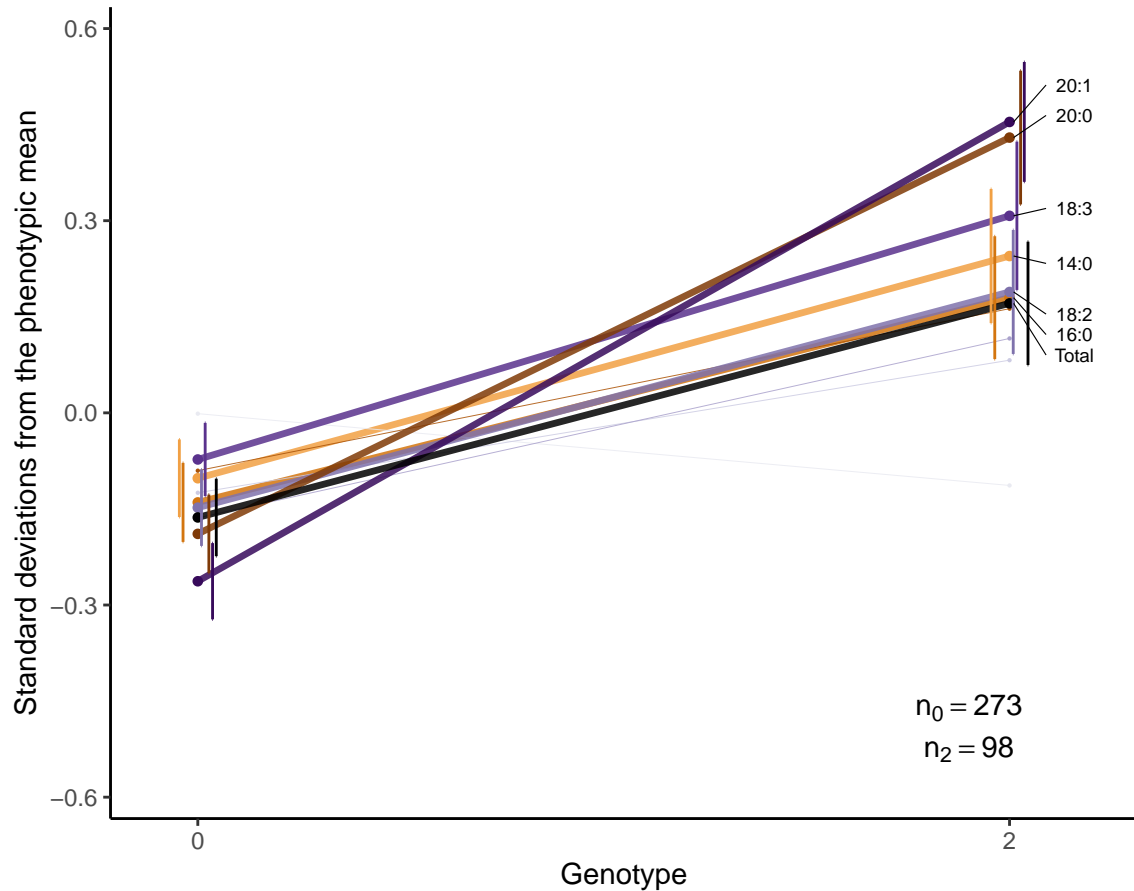

avgbs\_cluster\_7160.1.40 – Mrg02

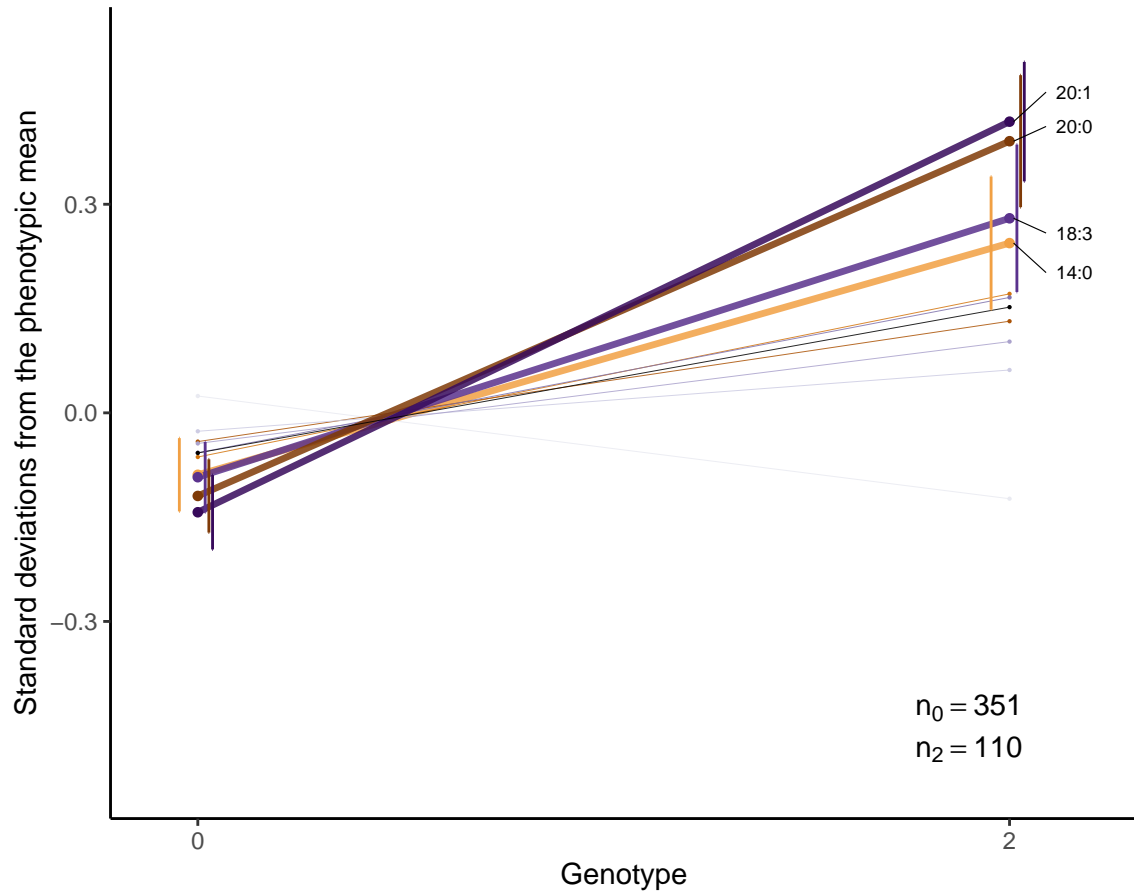

avgbs\_cluster\_9869.1.33 – Mrg02

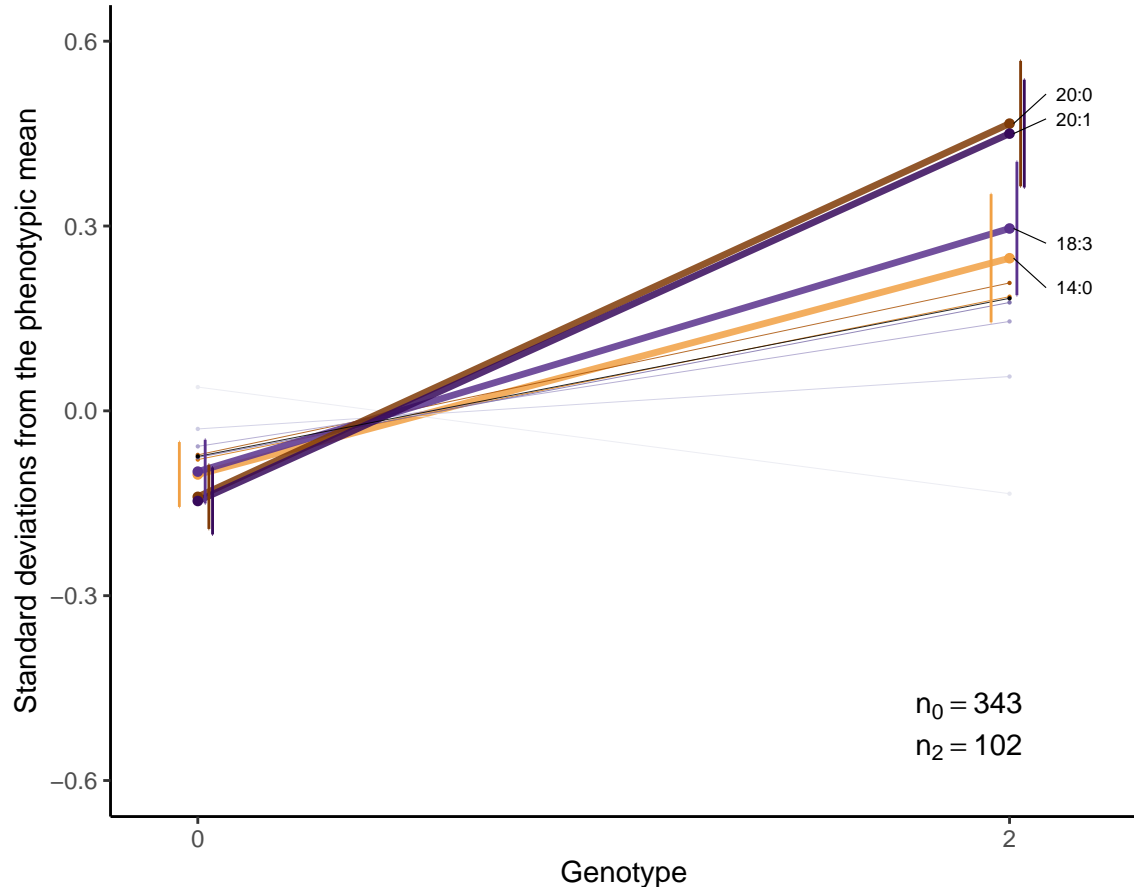

avgbs\_cluster\_13781.1.49 – Mrg02

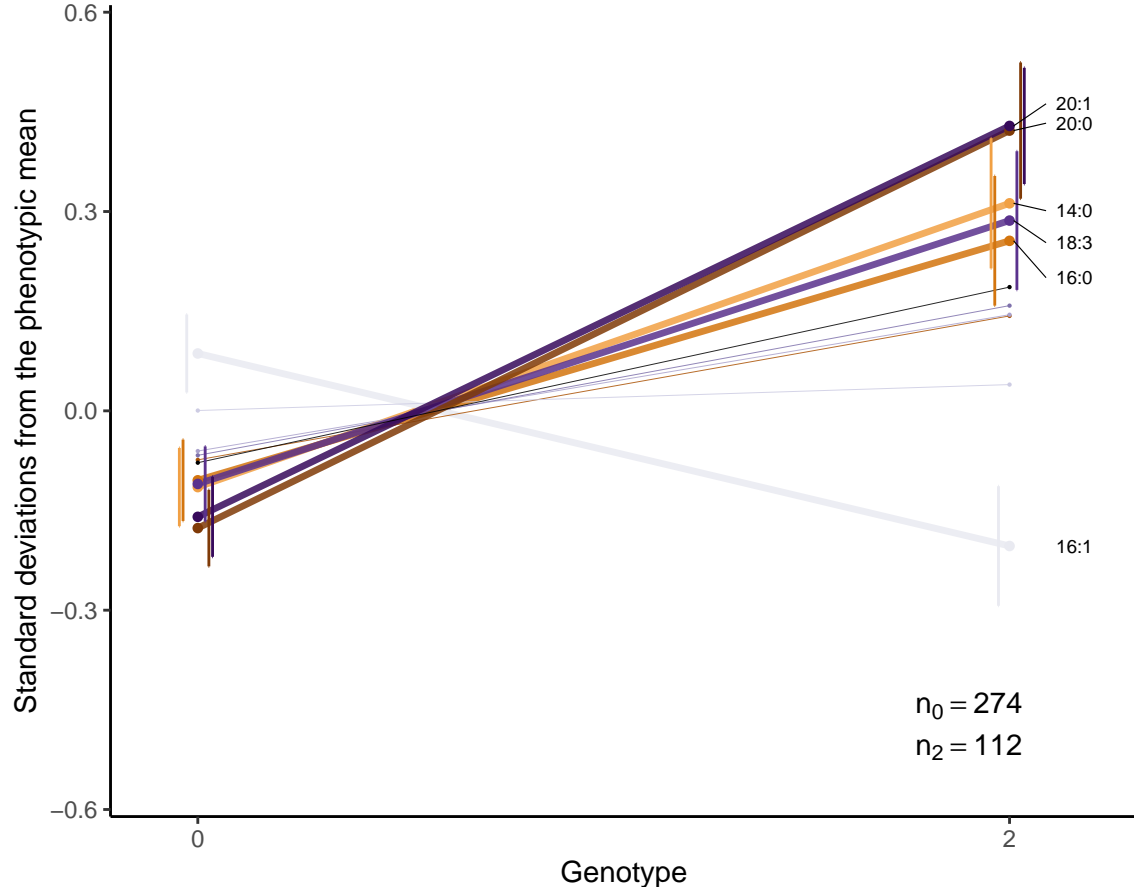

avgbs\_cluster\_29560.1.50 – Mrg02

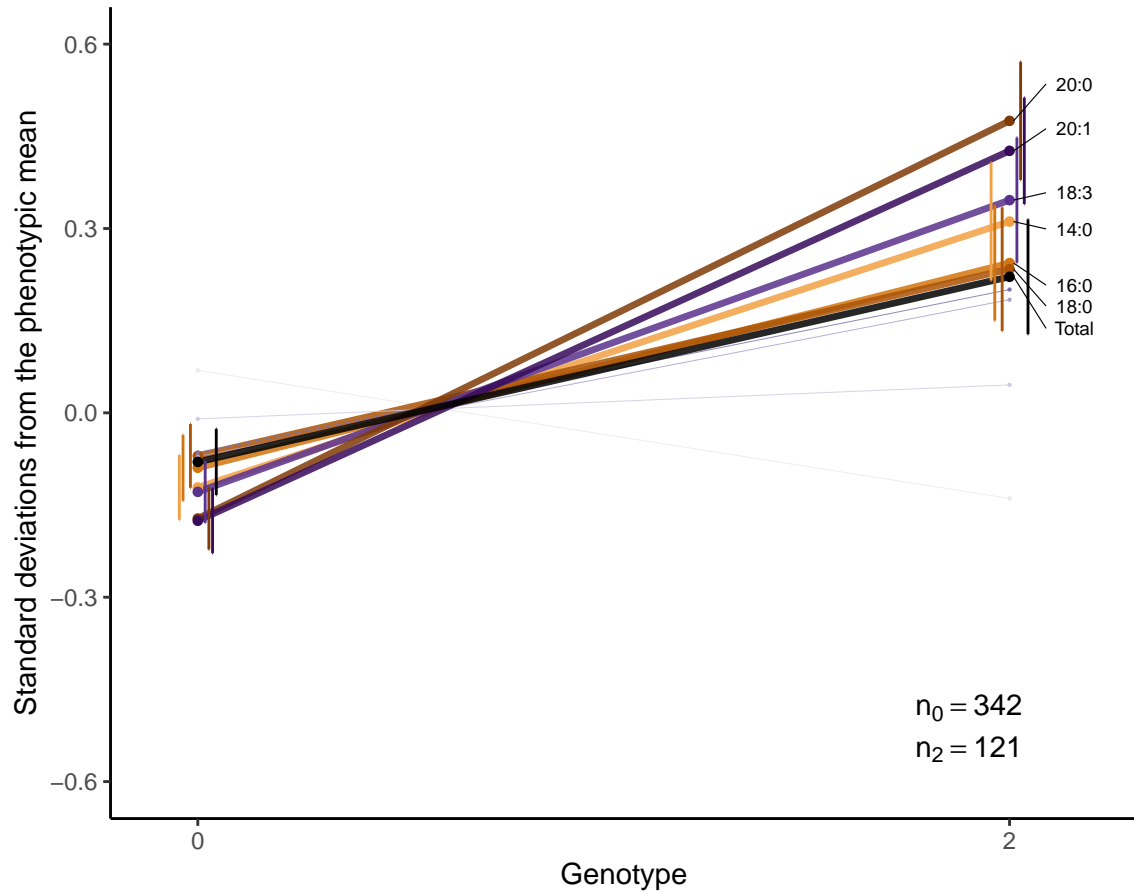

avgbs\_280364.1.12 – Mrg02

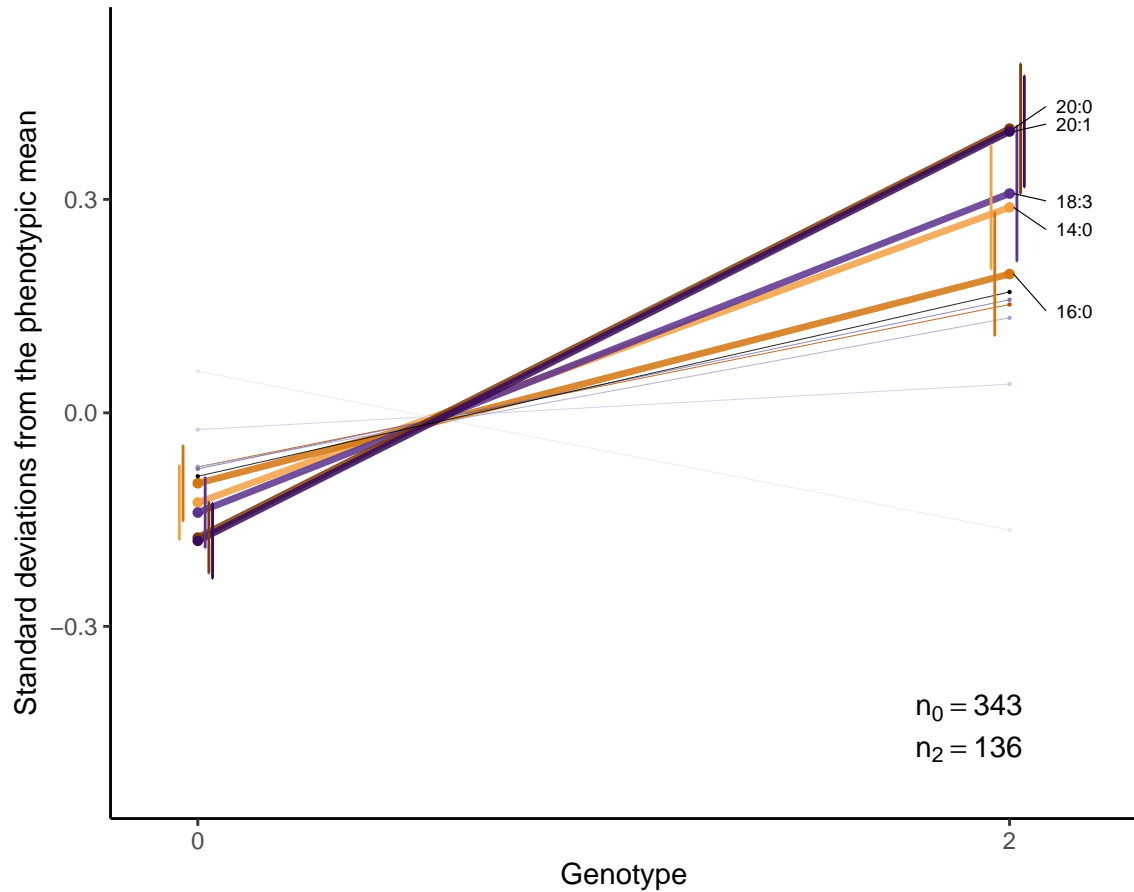

avgbs\_cluster\_35209.1.34 – Mrg02

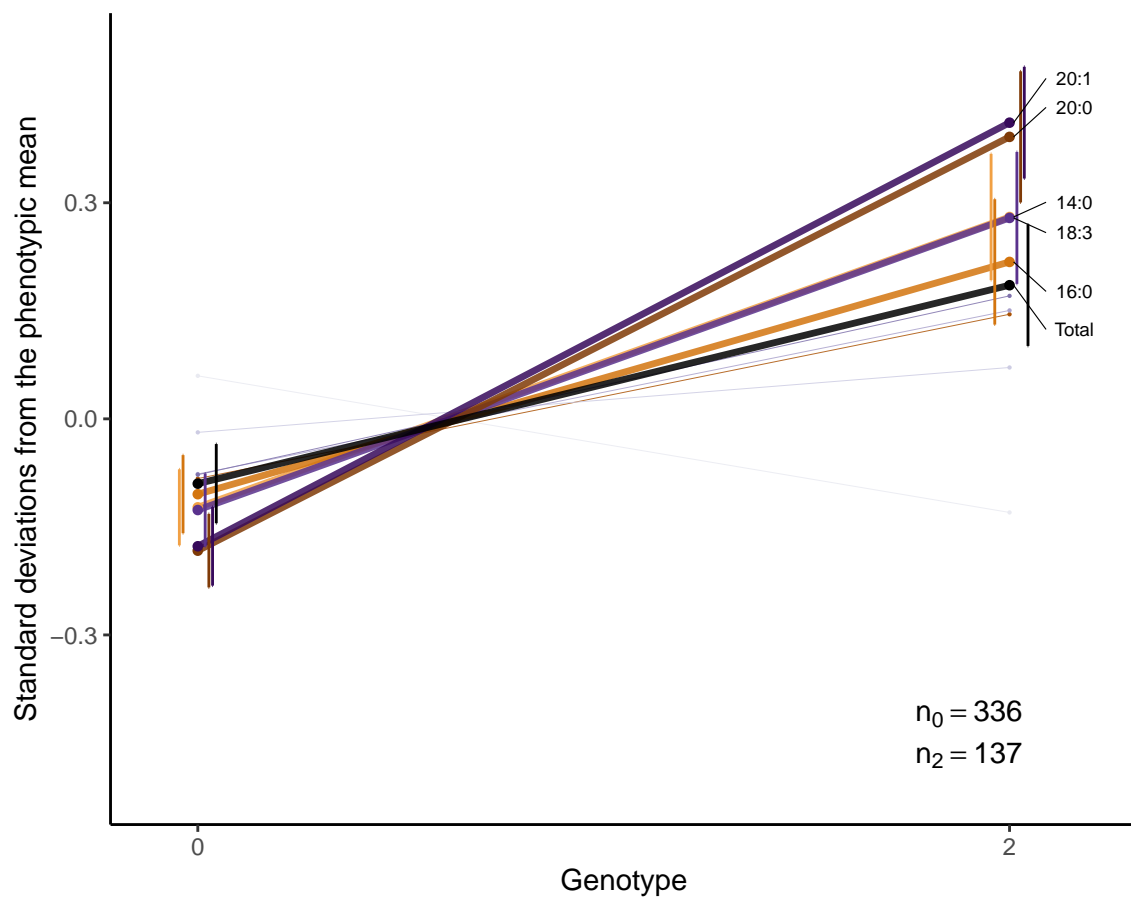

avgbs2\_43618.1.53 – Mrg02

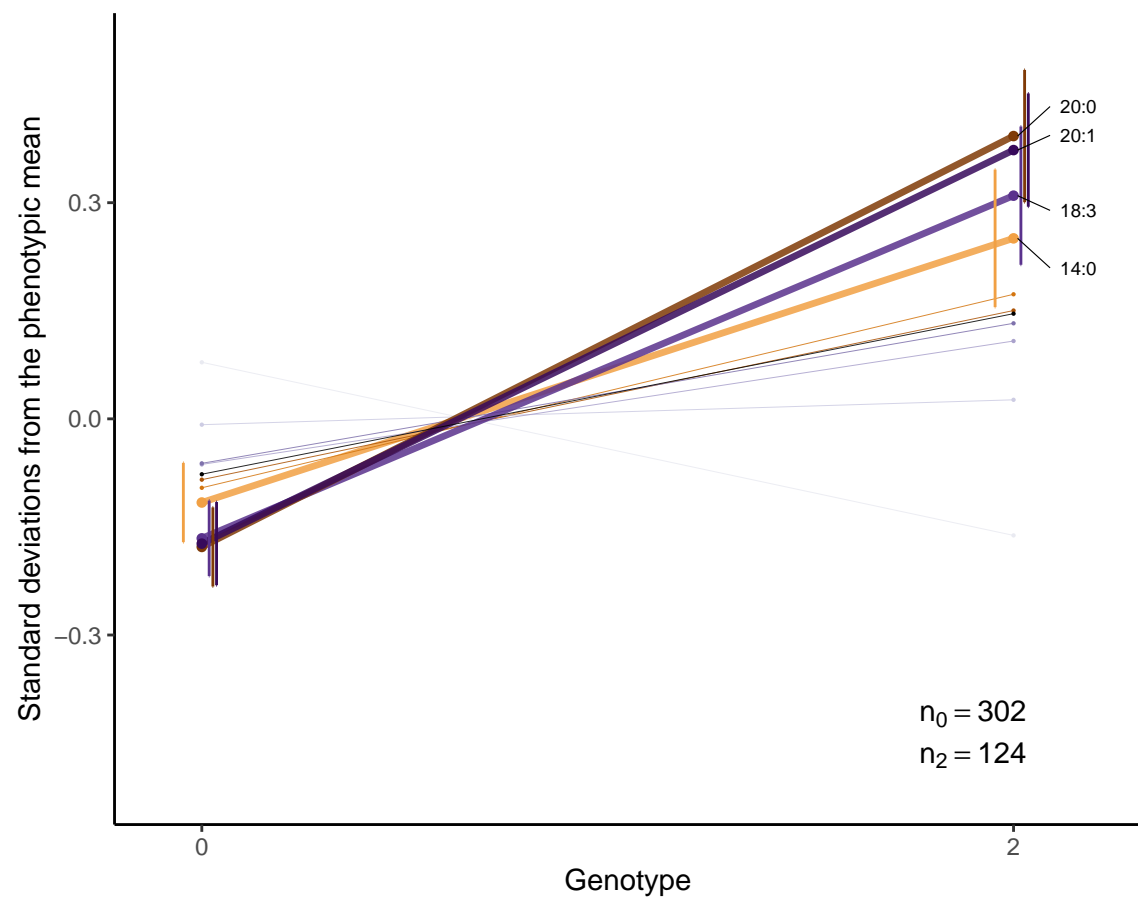

avgbs\_cluster\_2275.1.22 – Mrg02

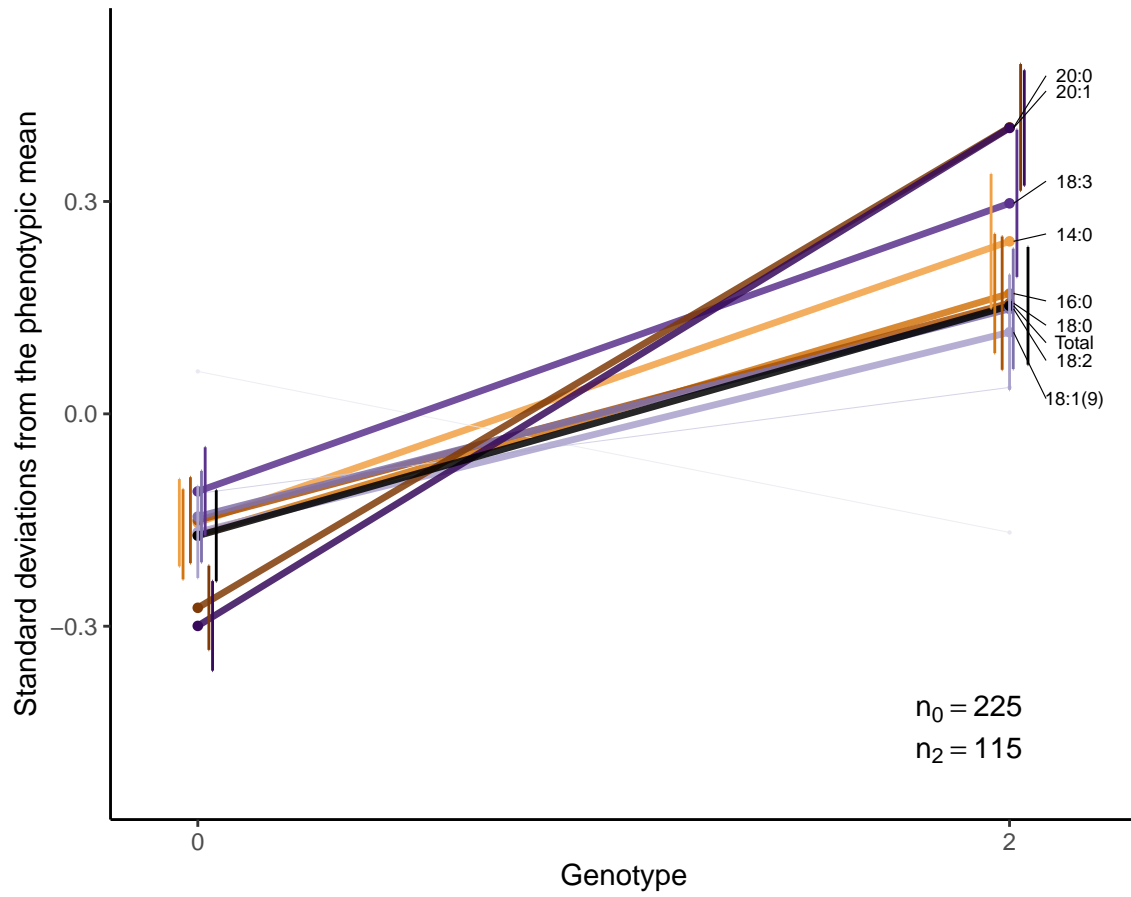

avgbs\_cluster\_30345.1.13 – Mrg02

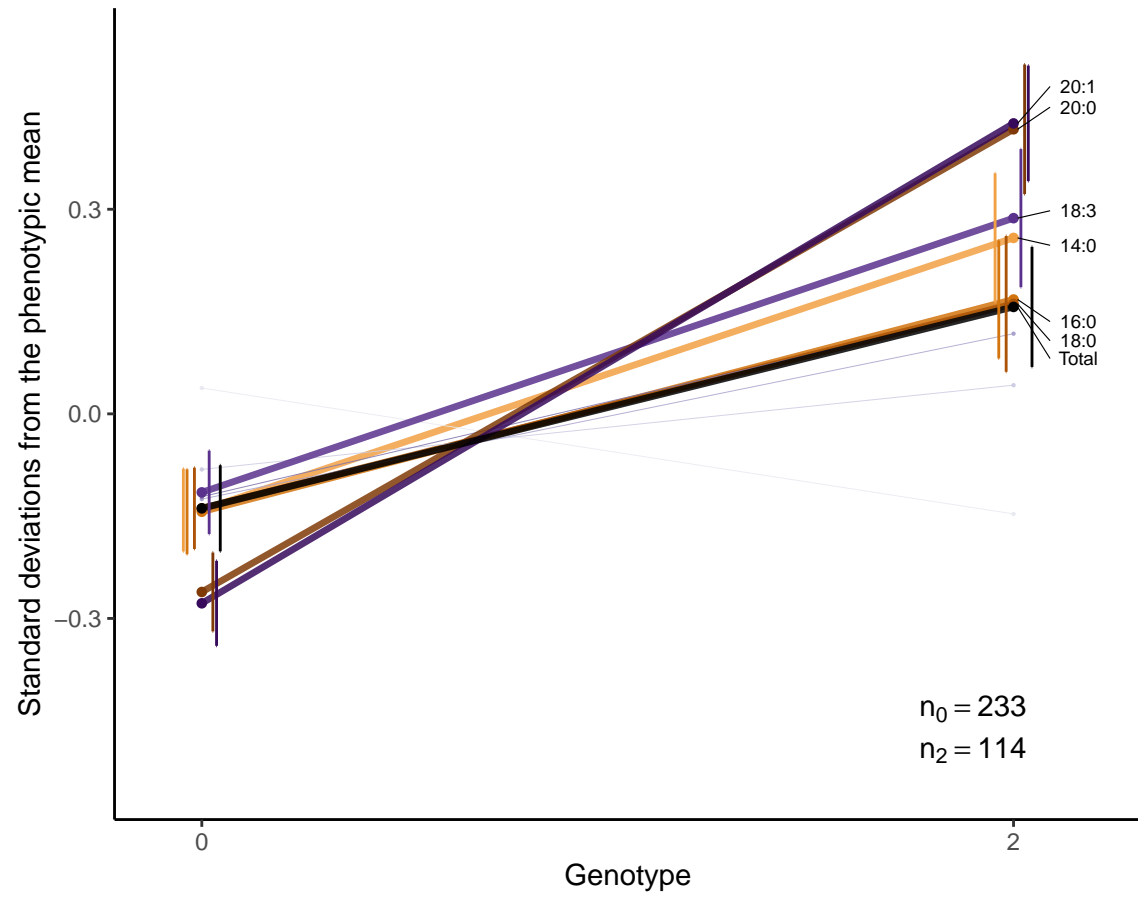

avgbs\_224766.1.54 – Mrg02

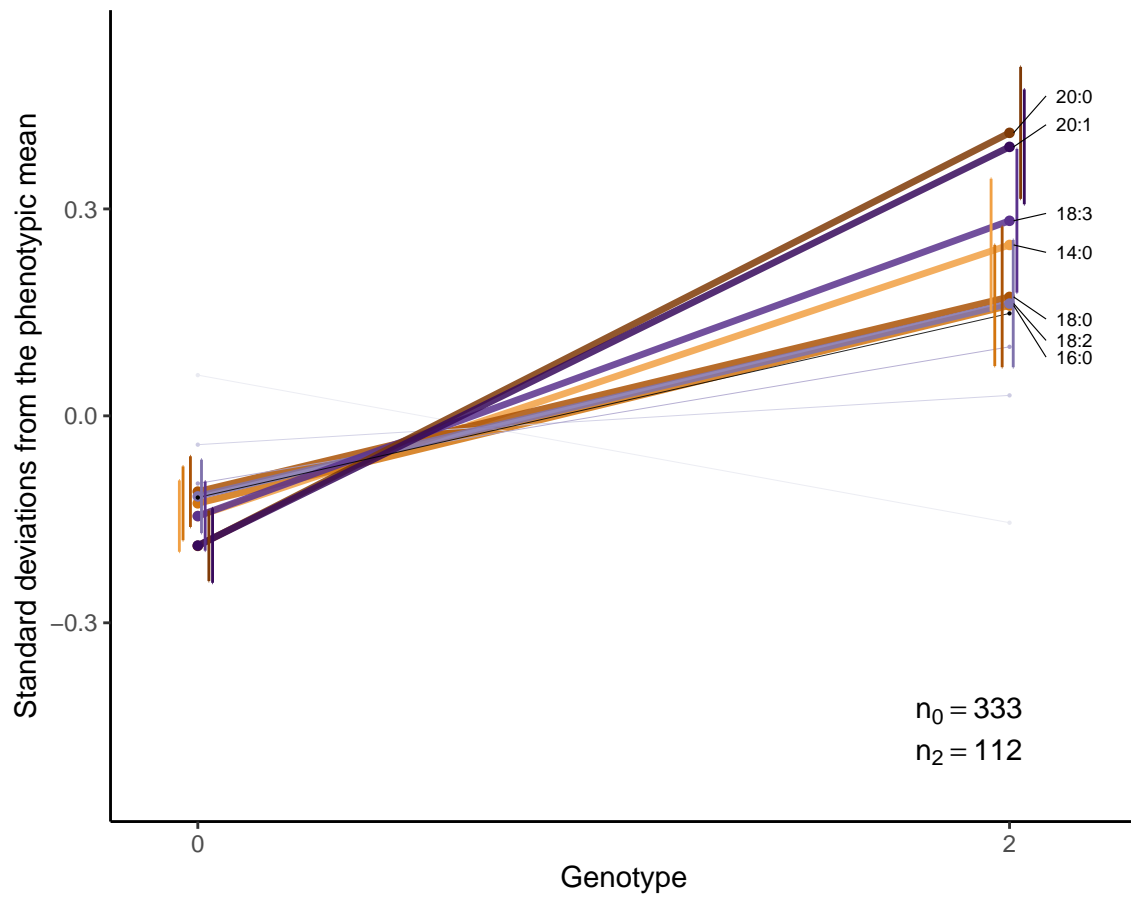

avgbs2\_91977.1.39 – Mrg02

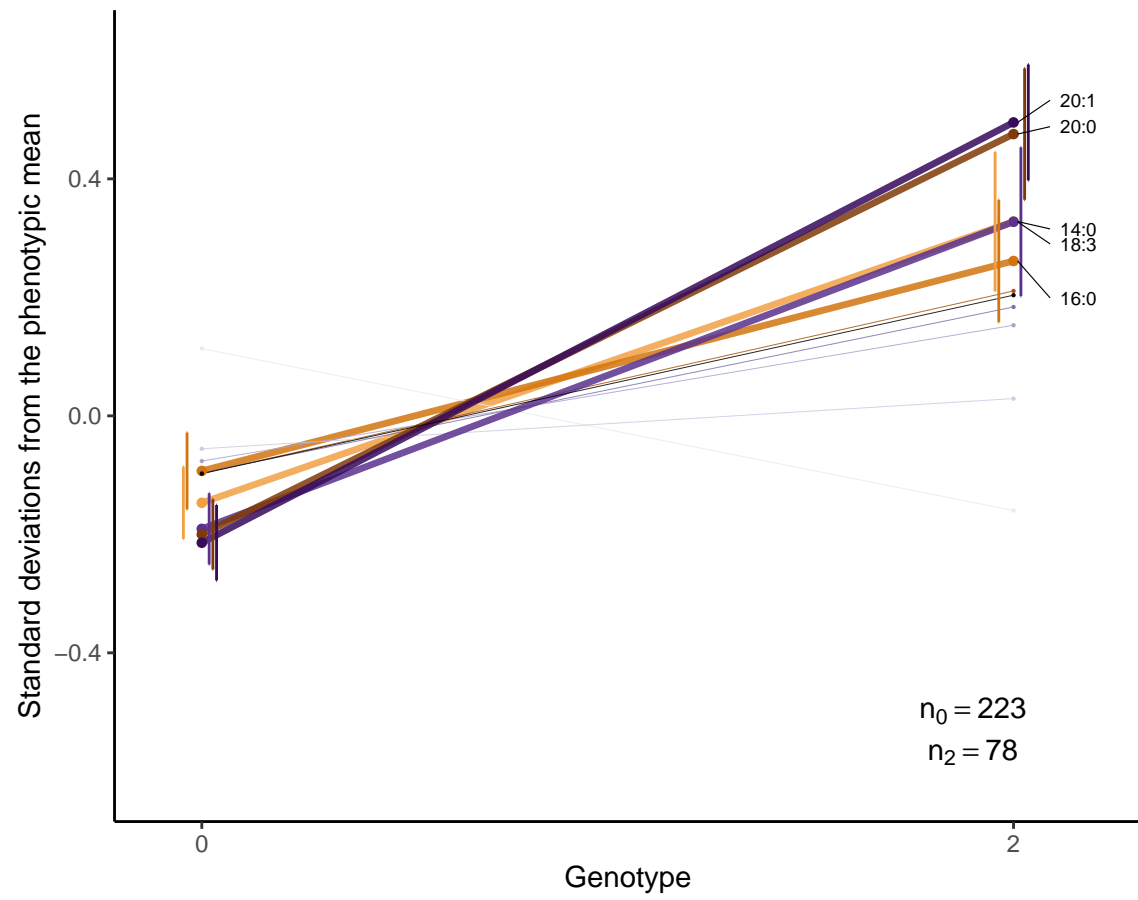



avgbs\_111199.1.14 – Mrg02

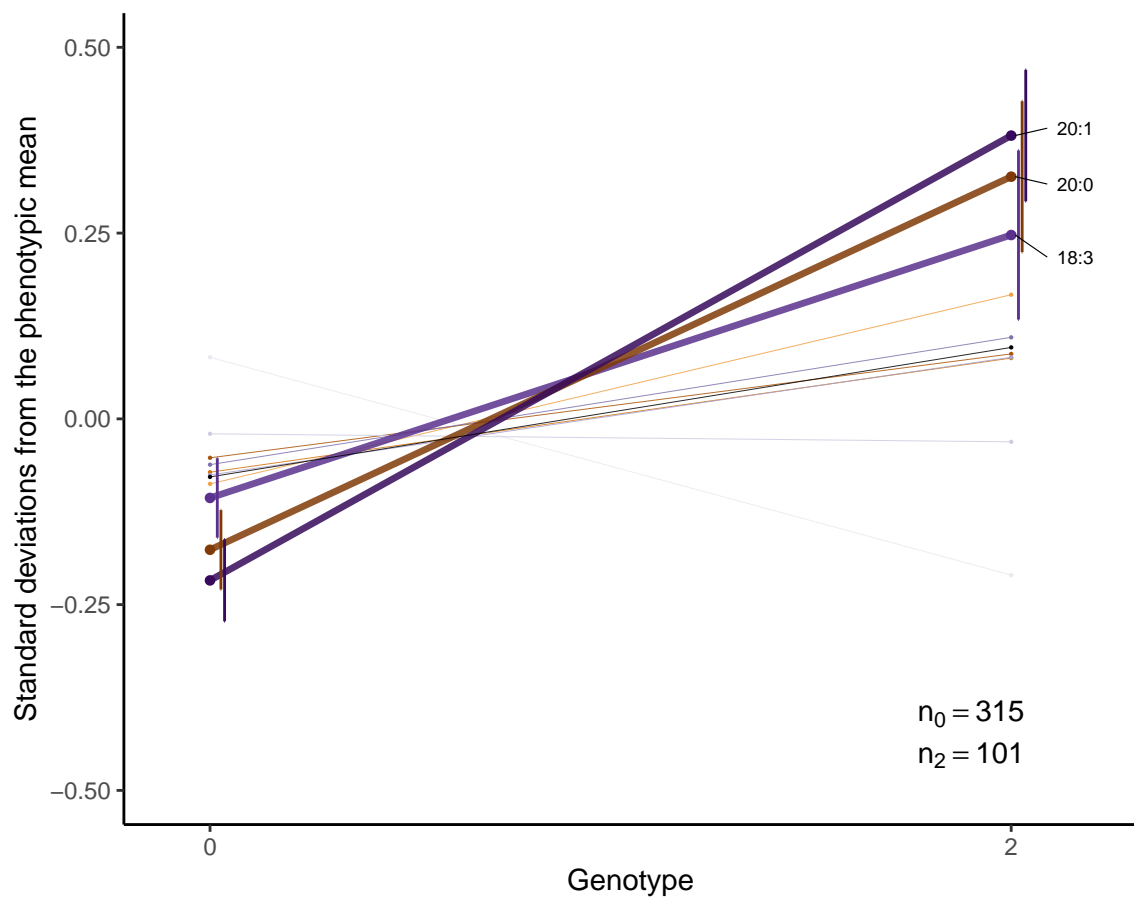

avgbs\_cluster\_26270.1.32 – Mrg02

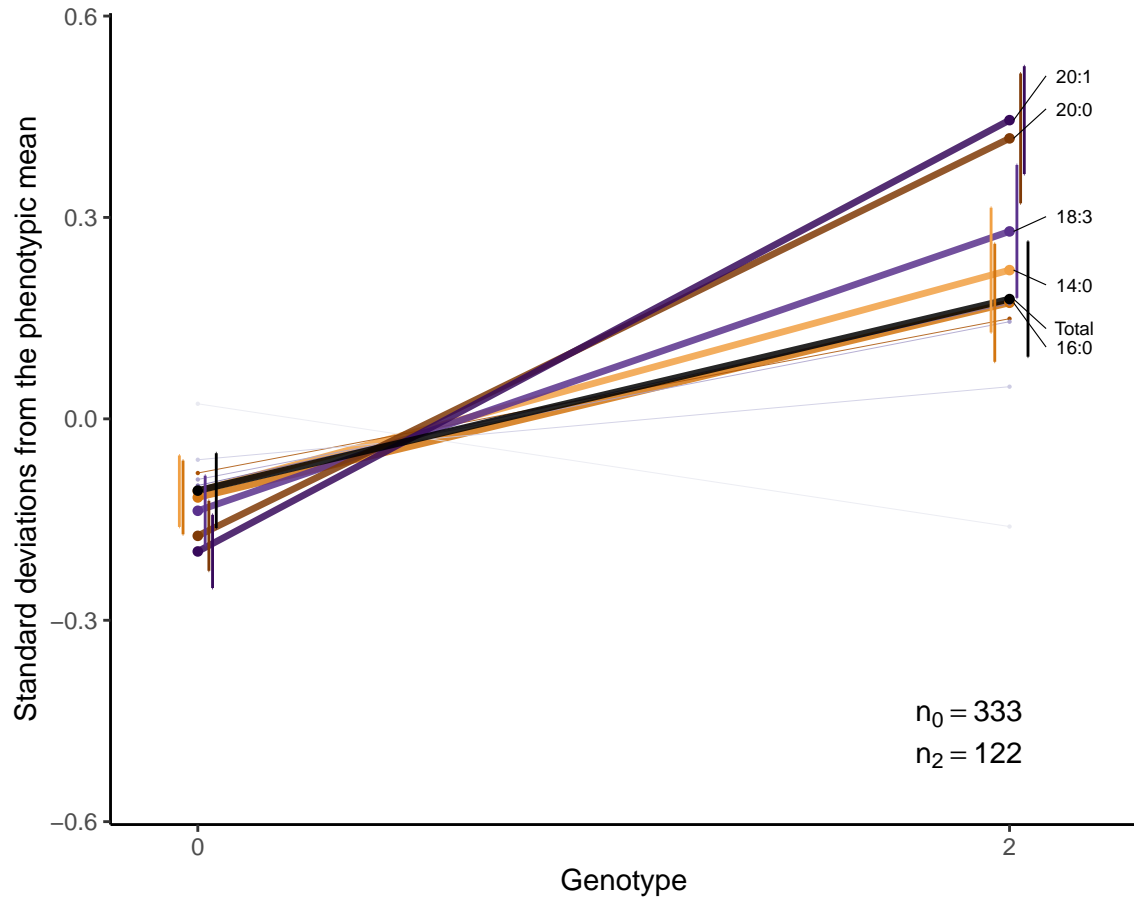

avgbs\_279289.1.33 – Mrg02

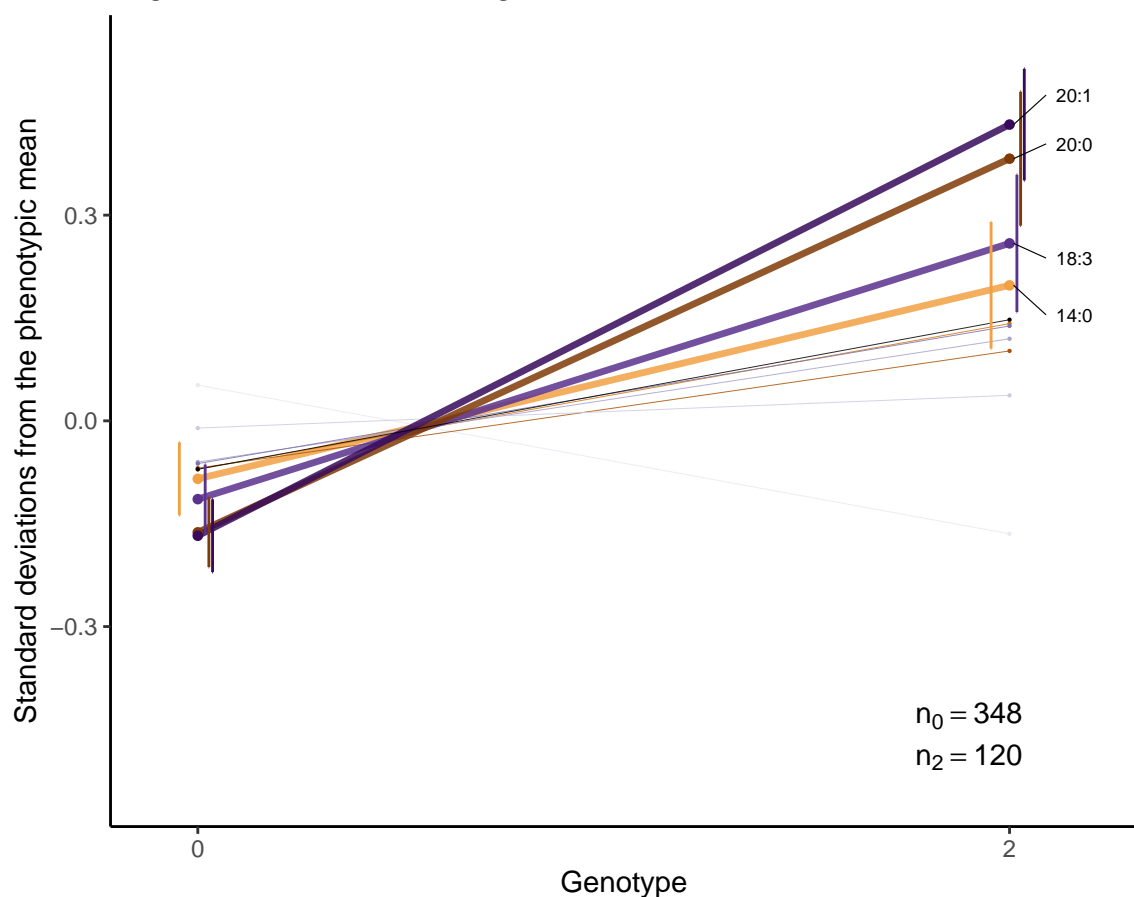

avgbs\_cluster\_8090.1.59 – Mrg02

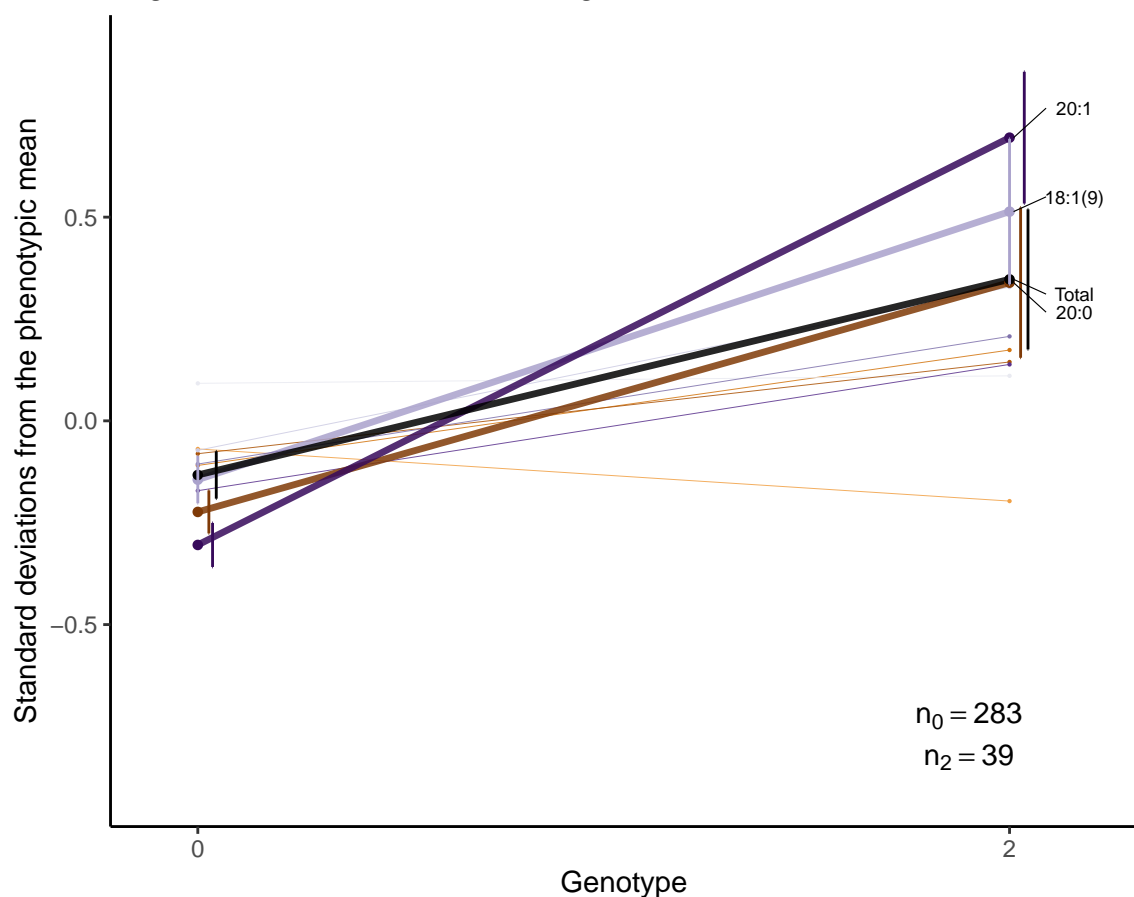

avgbs\_120631.1.44 – Mrg02

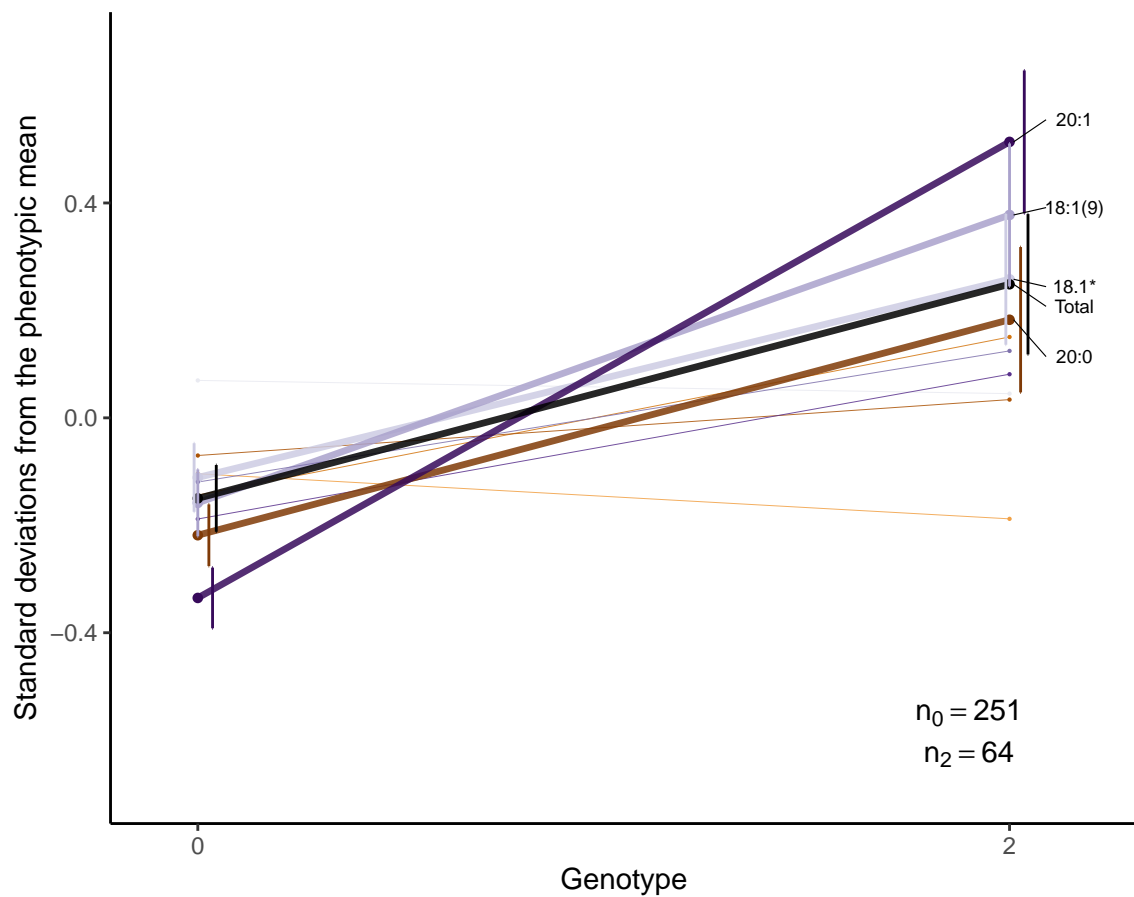

avgbs2\_173463.1.14 – Mrg02

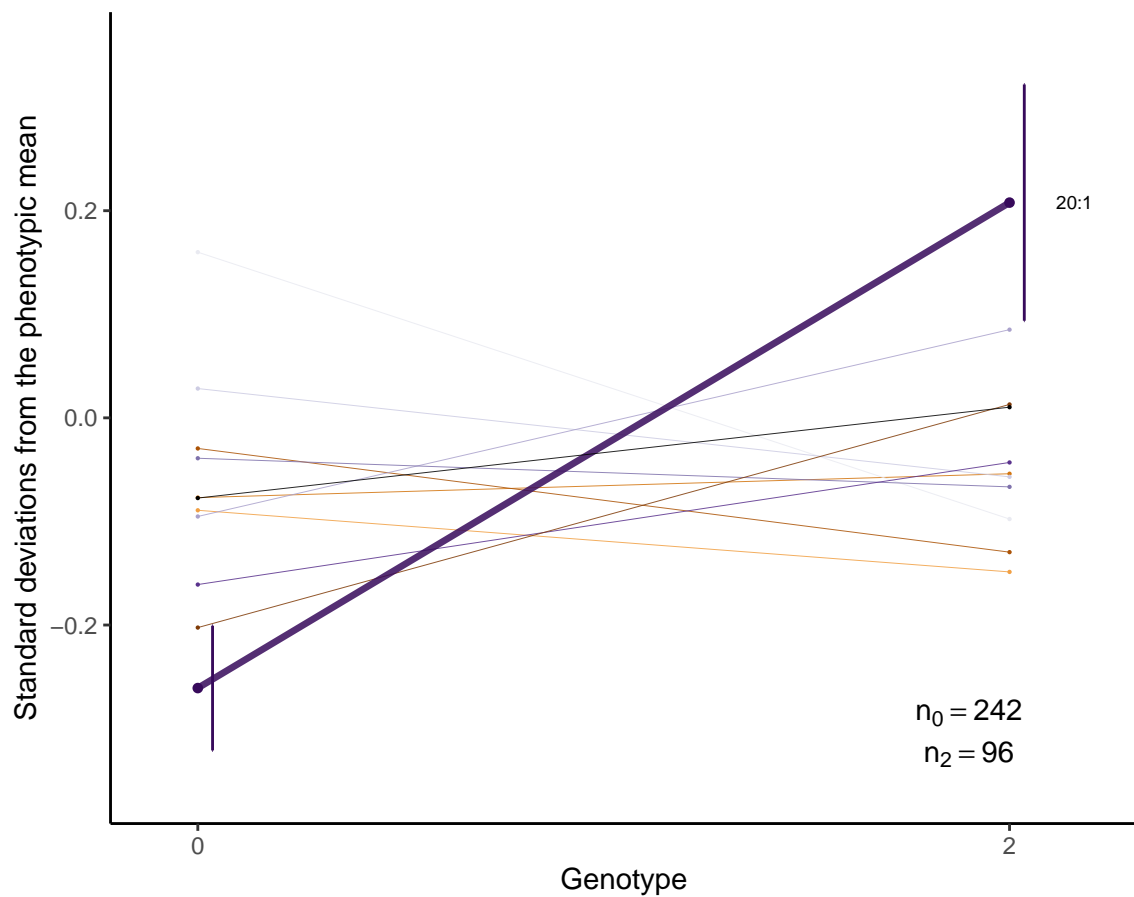

avgbs\_cluster\_6215.1.10 – Mrg02

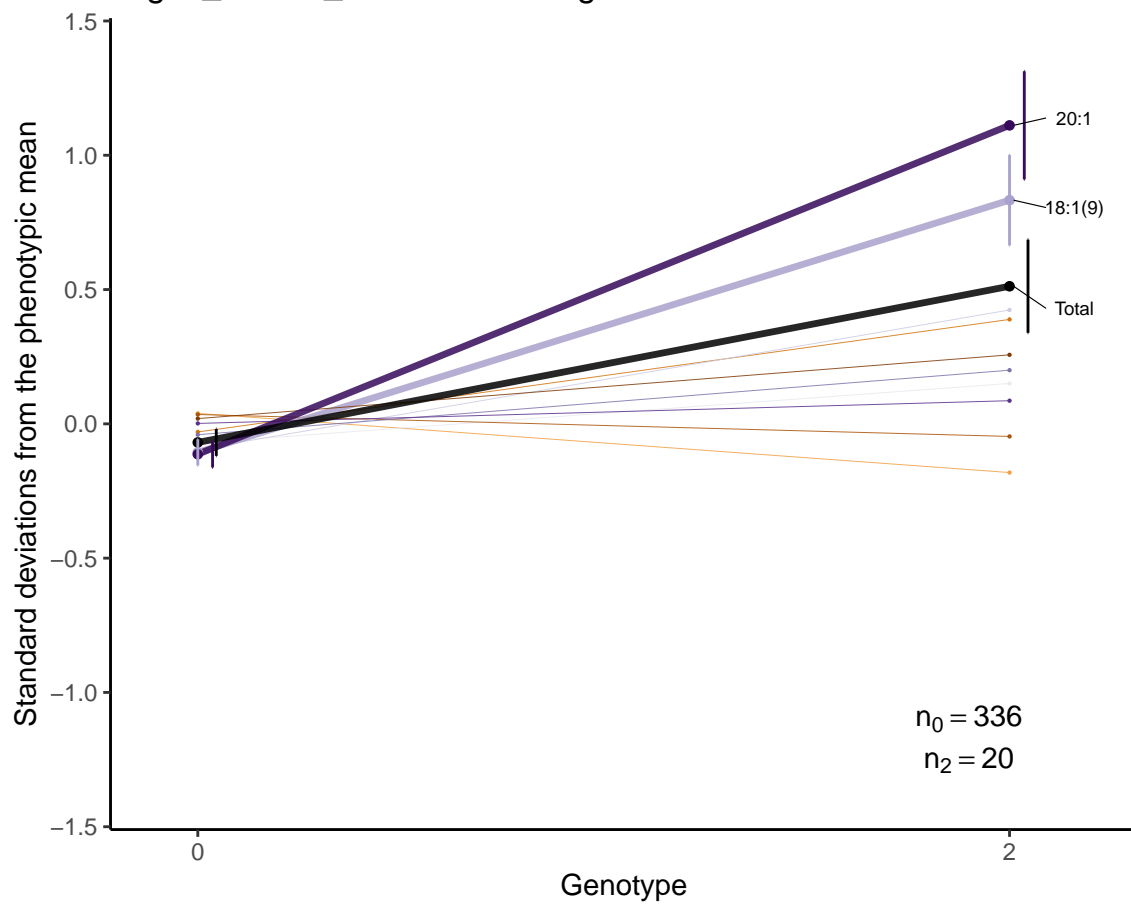

avgbs2\_191527.1.17 – Mrg02

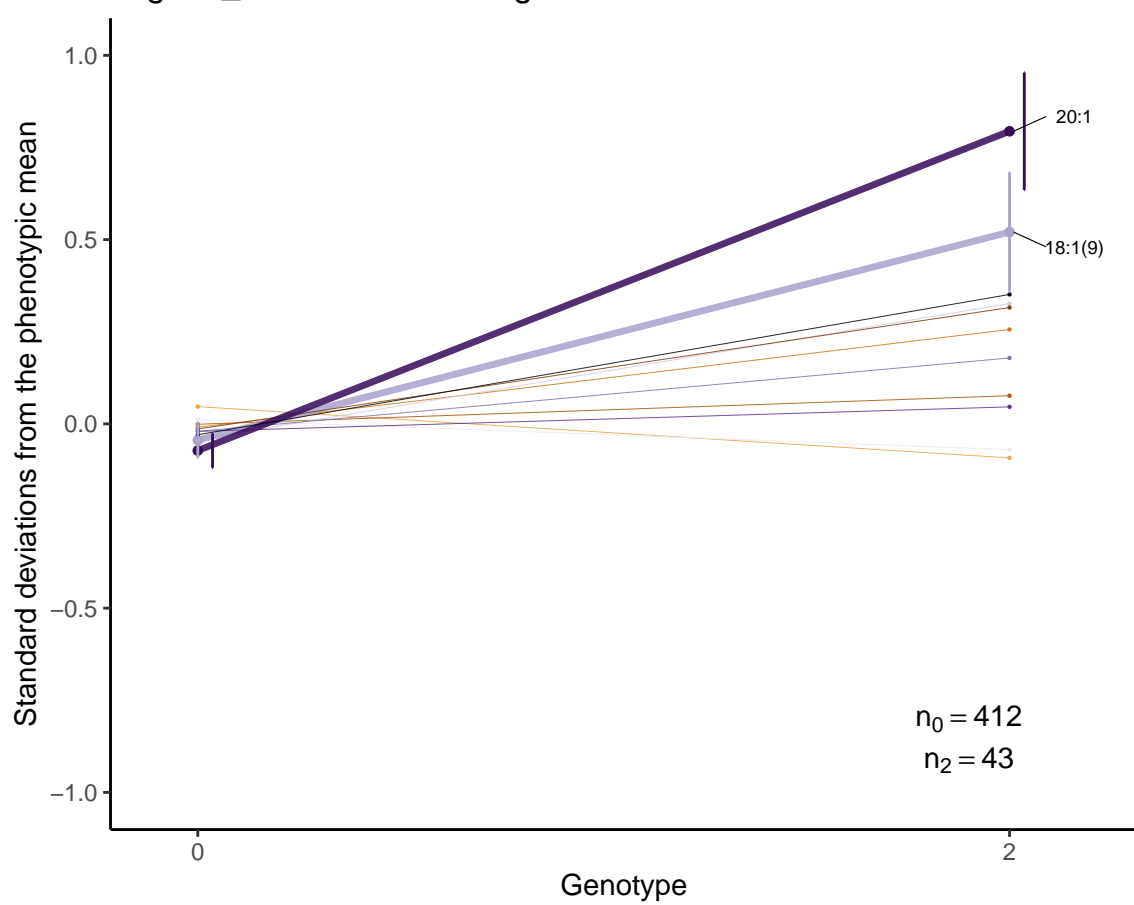

avgbs\_83462.1.34 – Mrg02

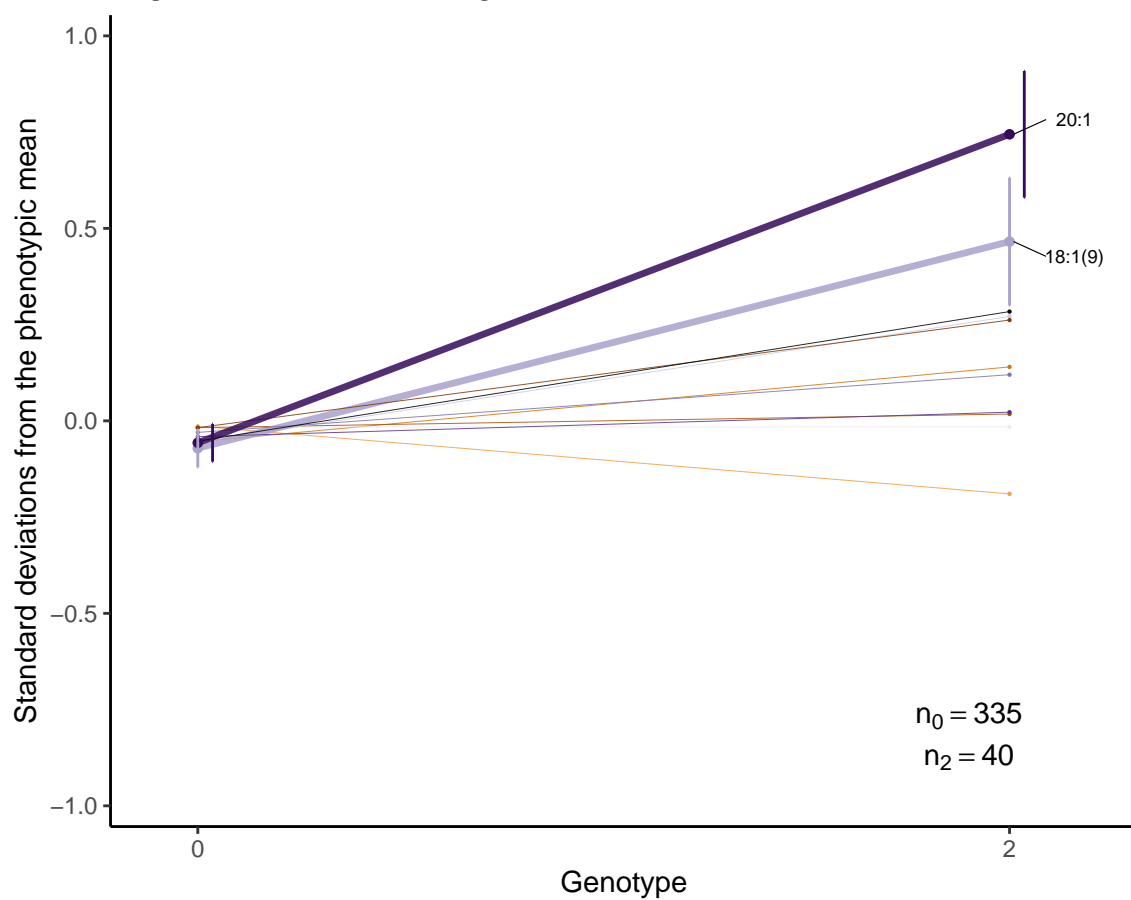

avgbs\_83414.1.11 – Mrg02

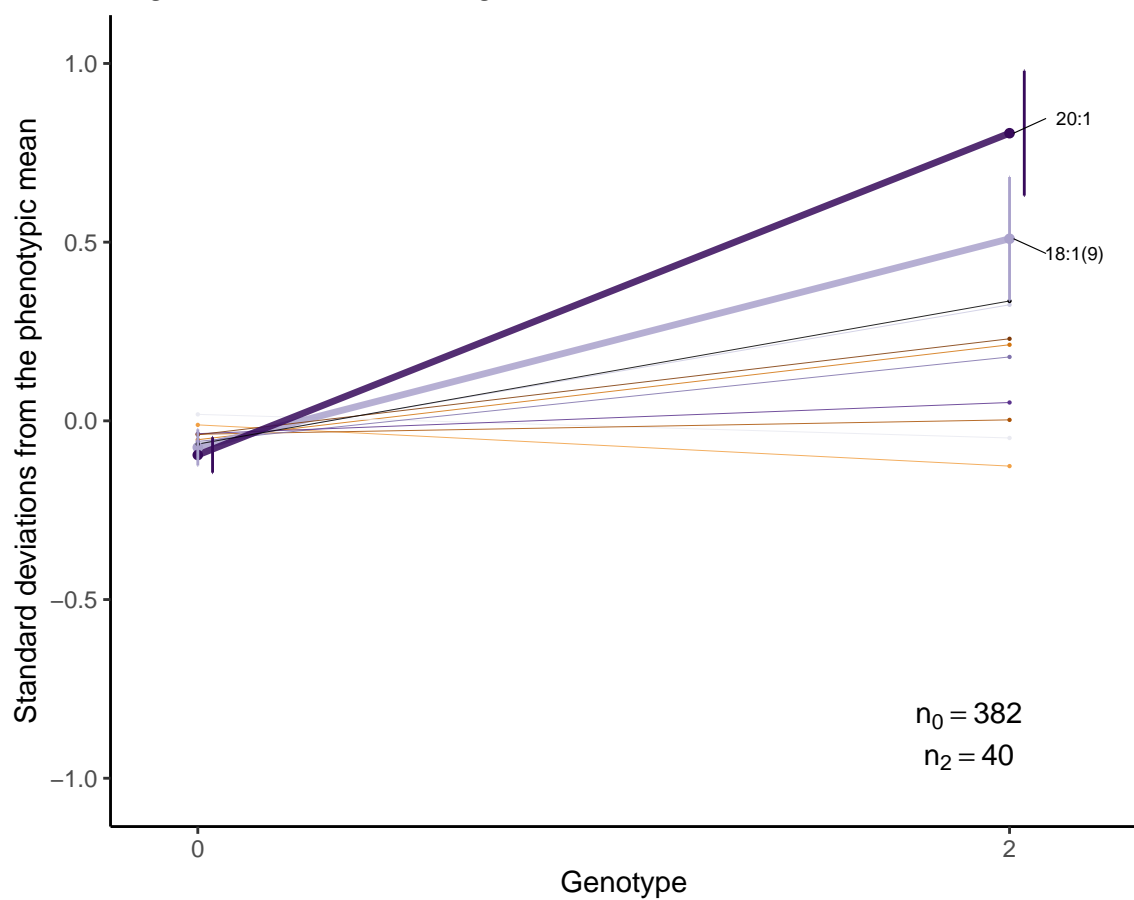

avgbs2\_115263.1.37 – Mrg02

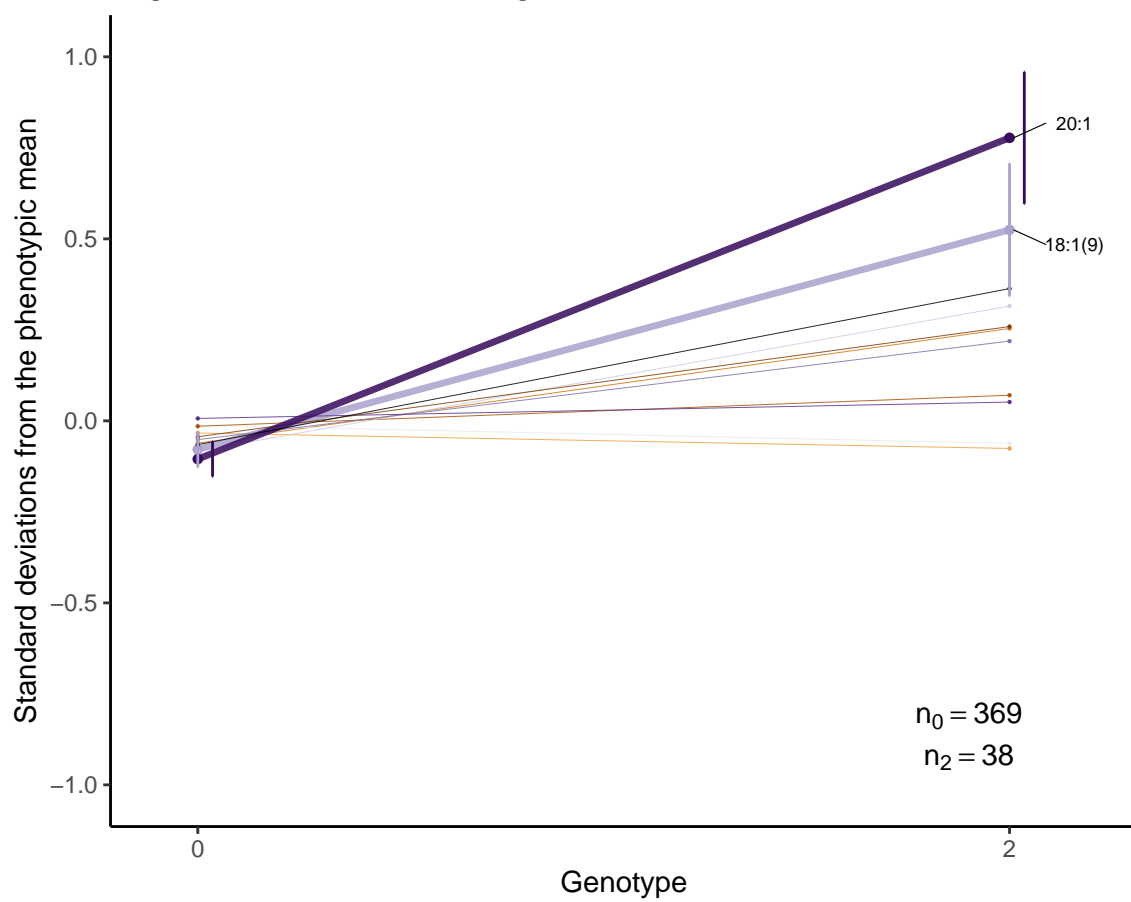

avgbs\_cluster\_22256.1.52 – Mrg02

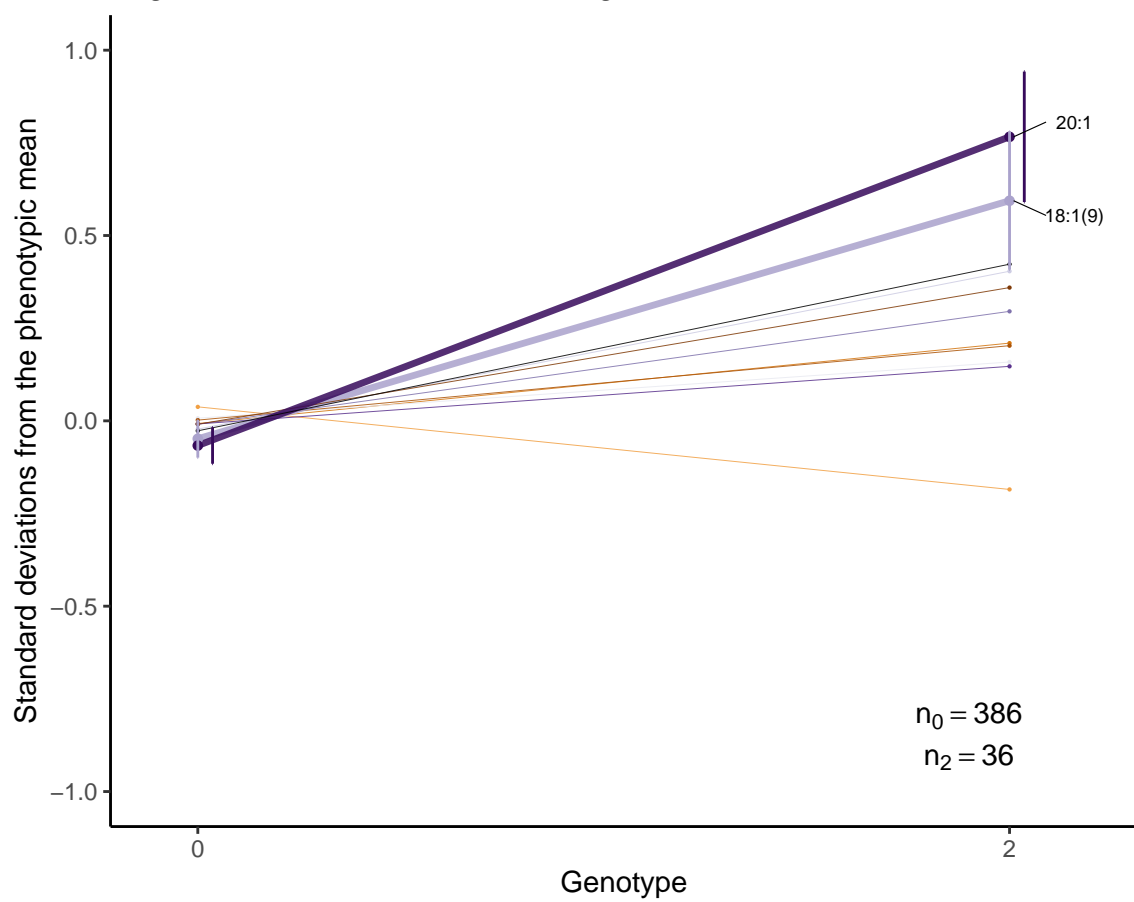



avgbs\_22604.1.53 – Mrg02

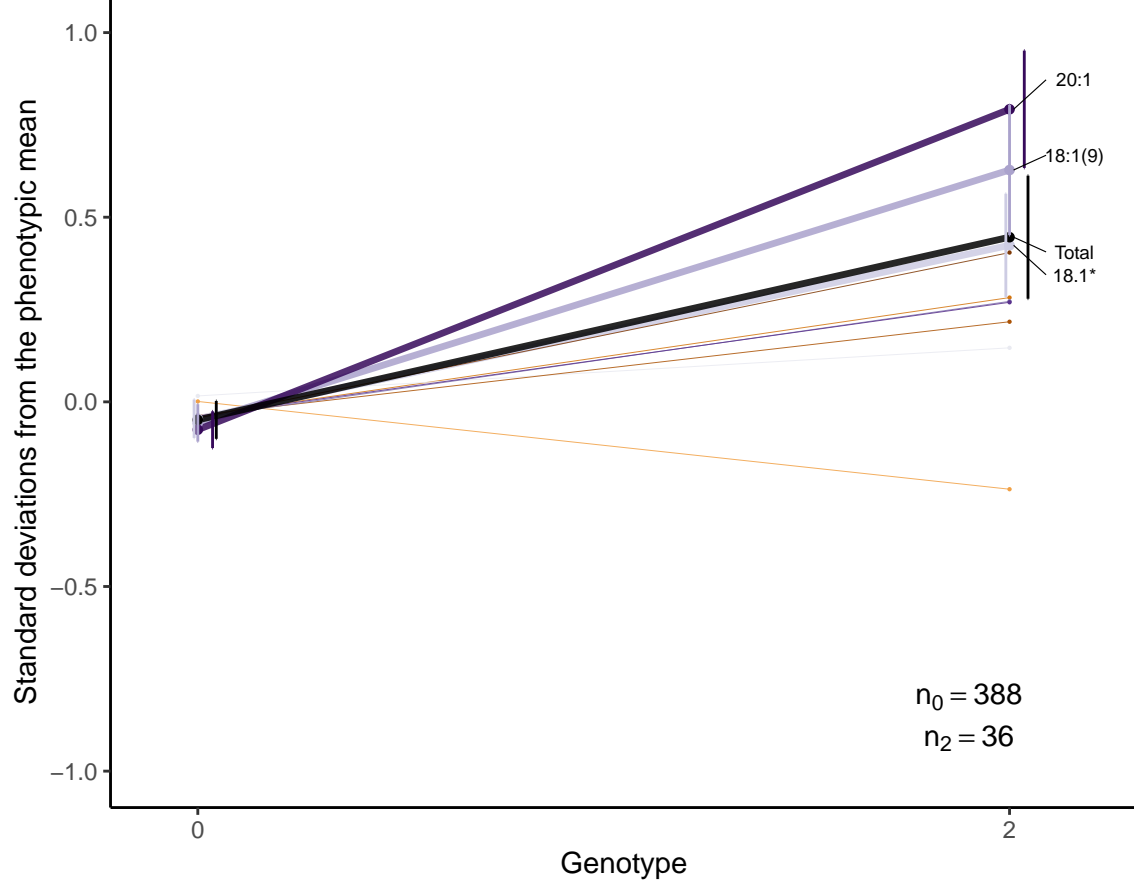

avgbs\_cluster\_30072.1.31 – Mrg02

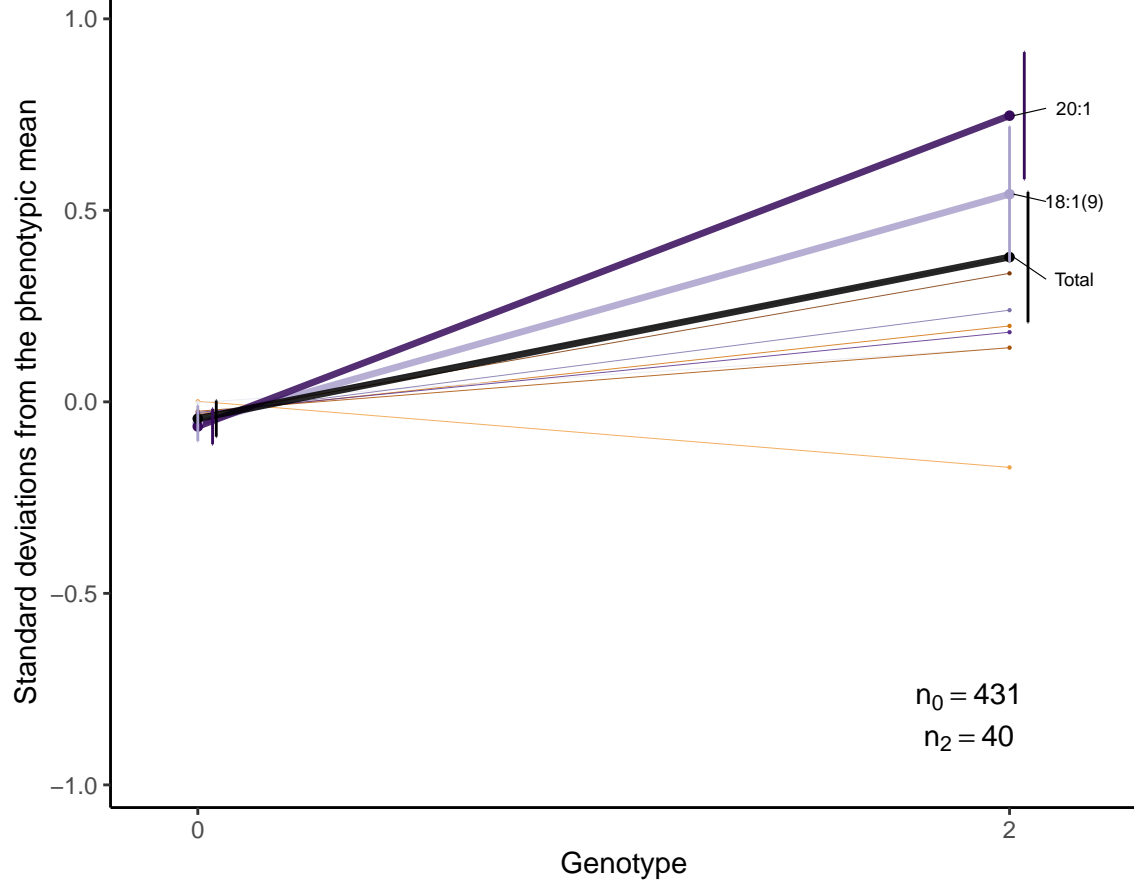

avgbs\_206300.1.28 – Mrg02

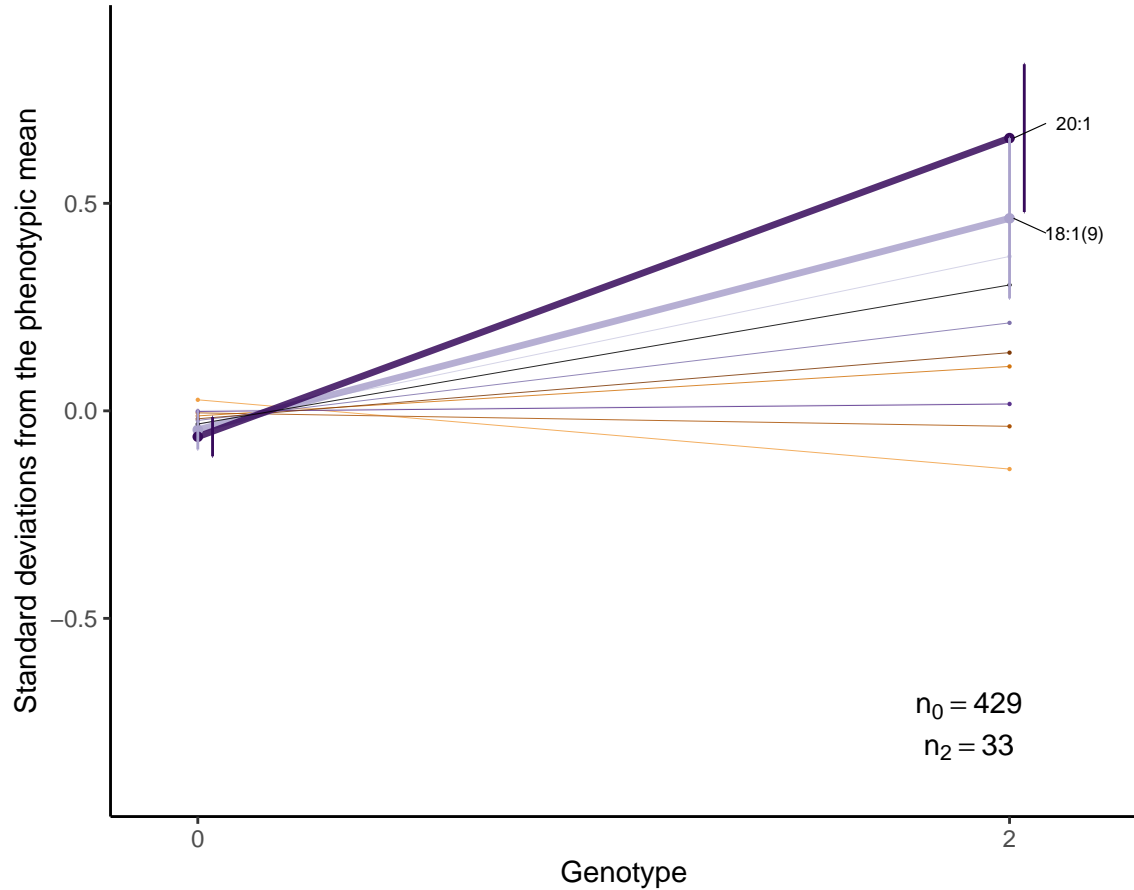

avgbs2\_15391.1.24 – Mrg02

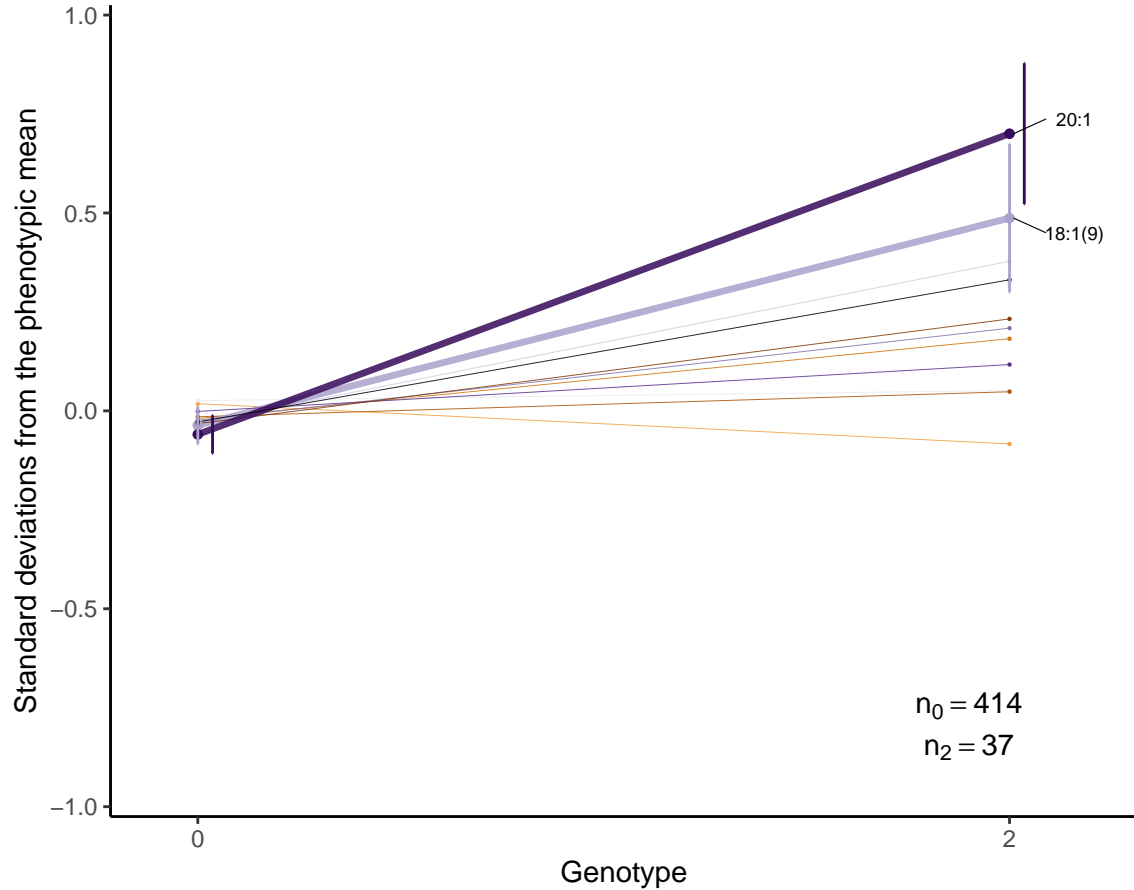

avgbs\_cluster\_35269.1.9 – Mrg02

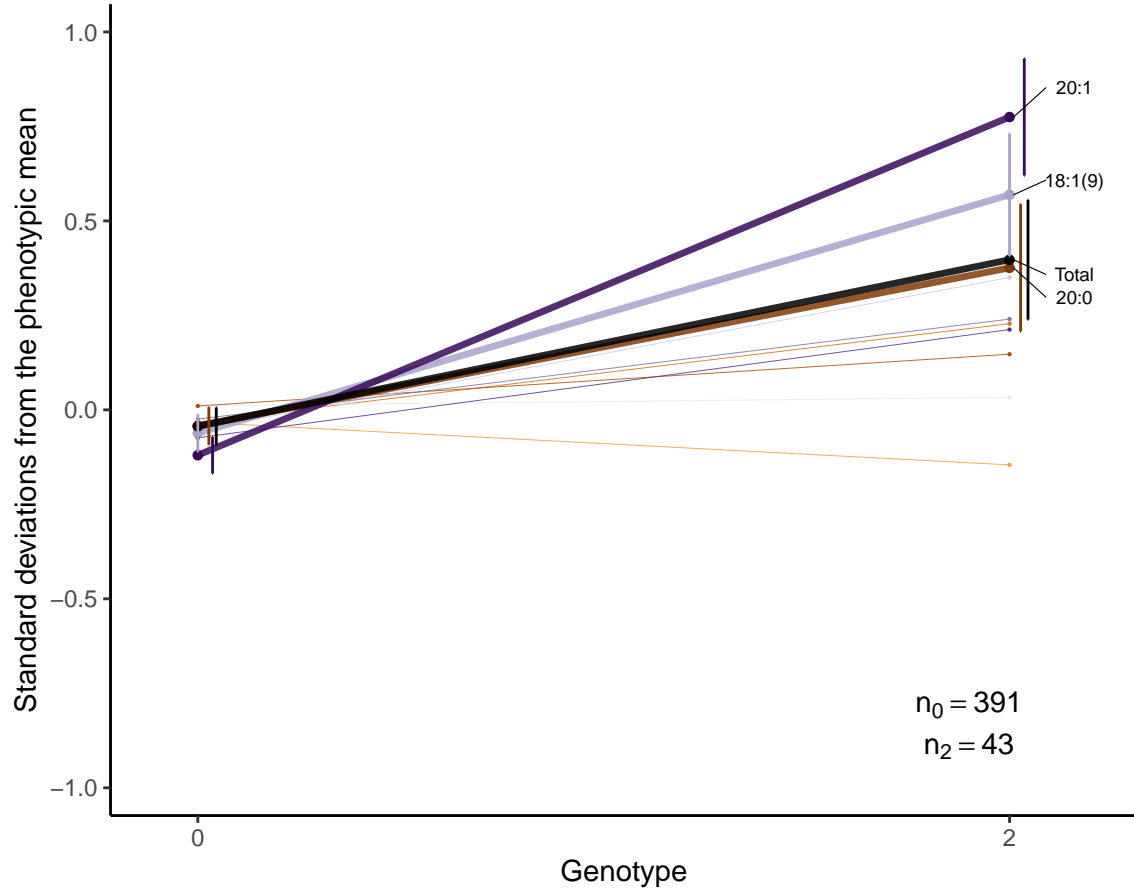

avgbs2\_168358.1.58 – Mrg02

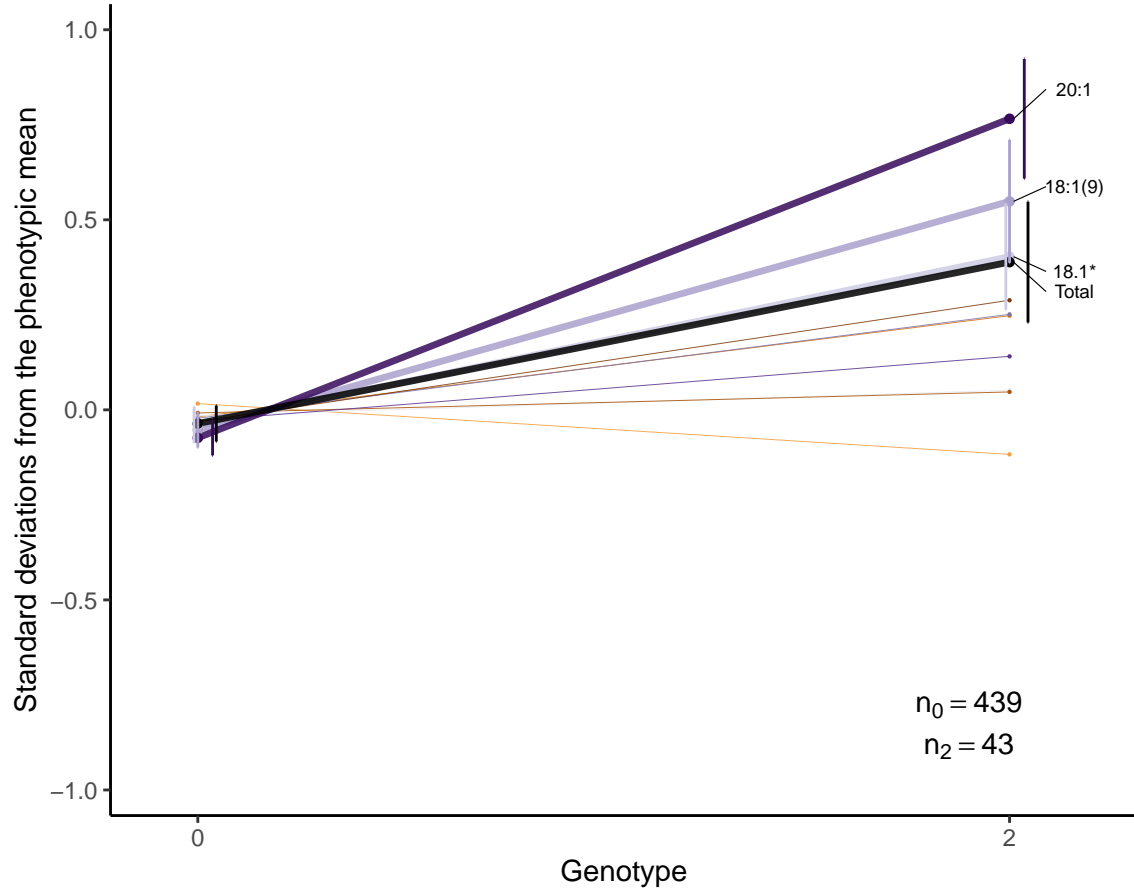

avgbs2\_169277.1.46 – Mrg02

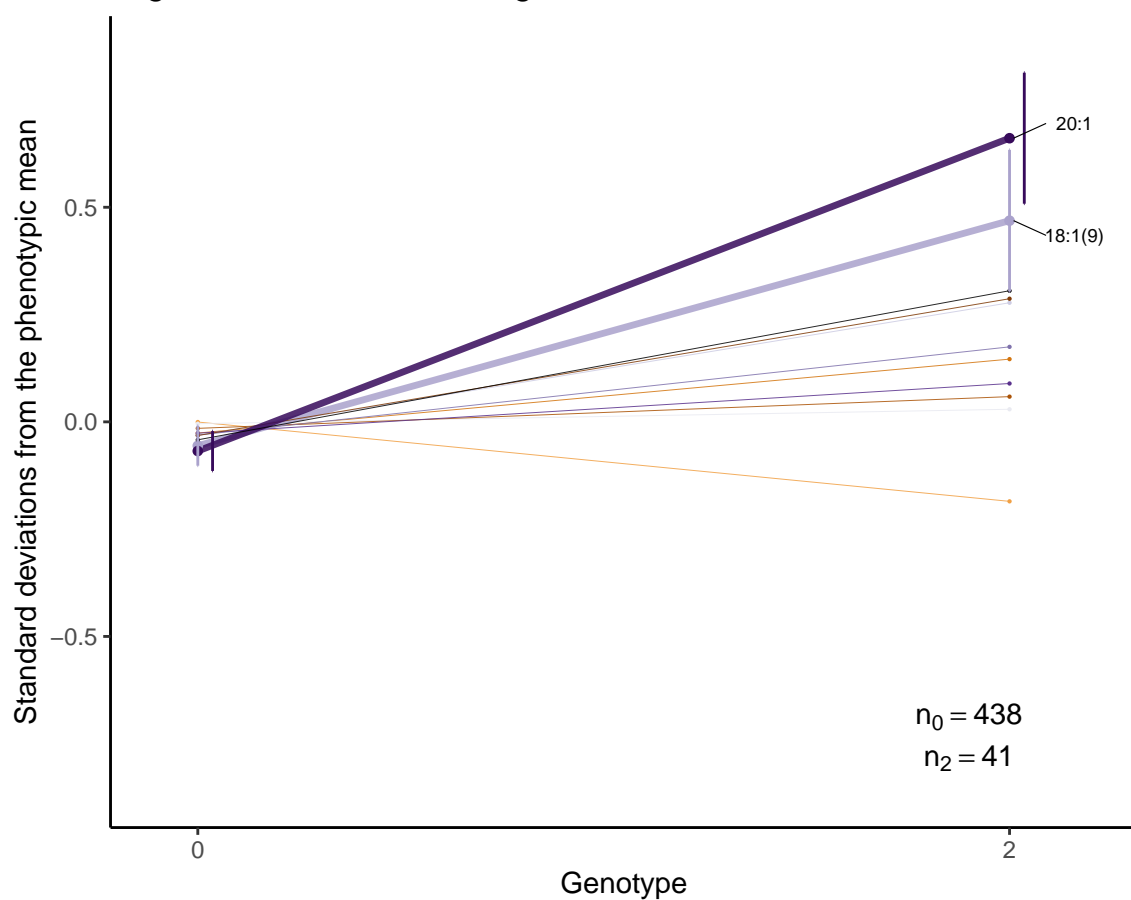

avgbs2\_154305.1.43 – Mrg05

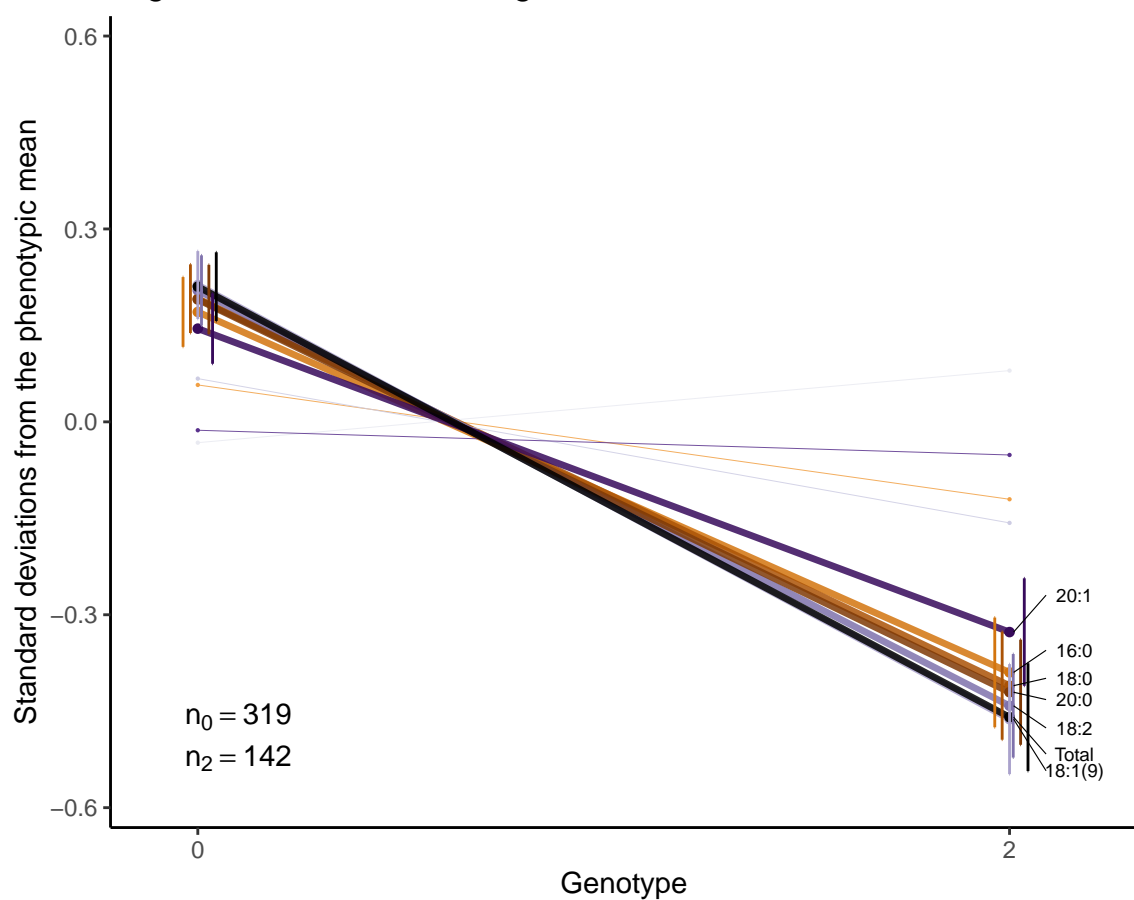

avgbs\_cluster\_16649.1.40 – Mrg05

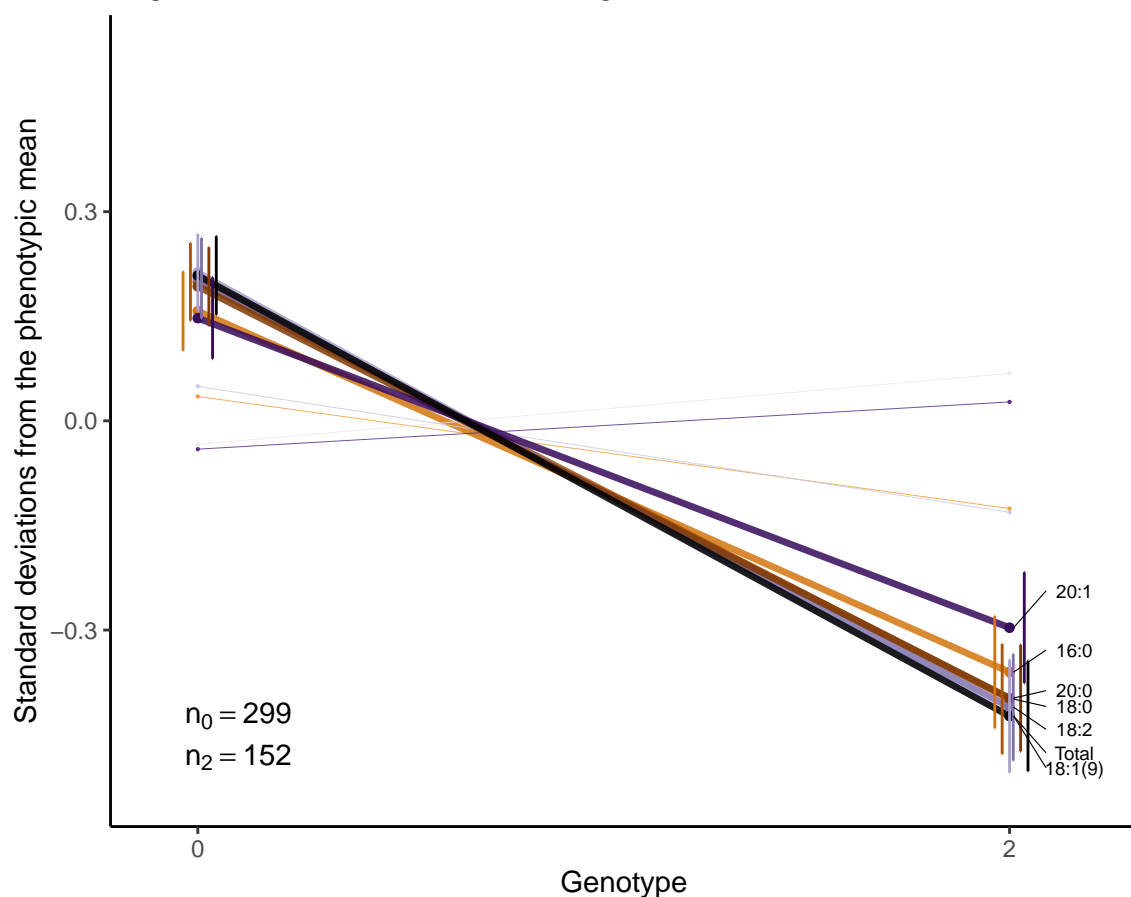

avgbs2\_7186.1.6 – Mrg05

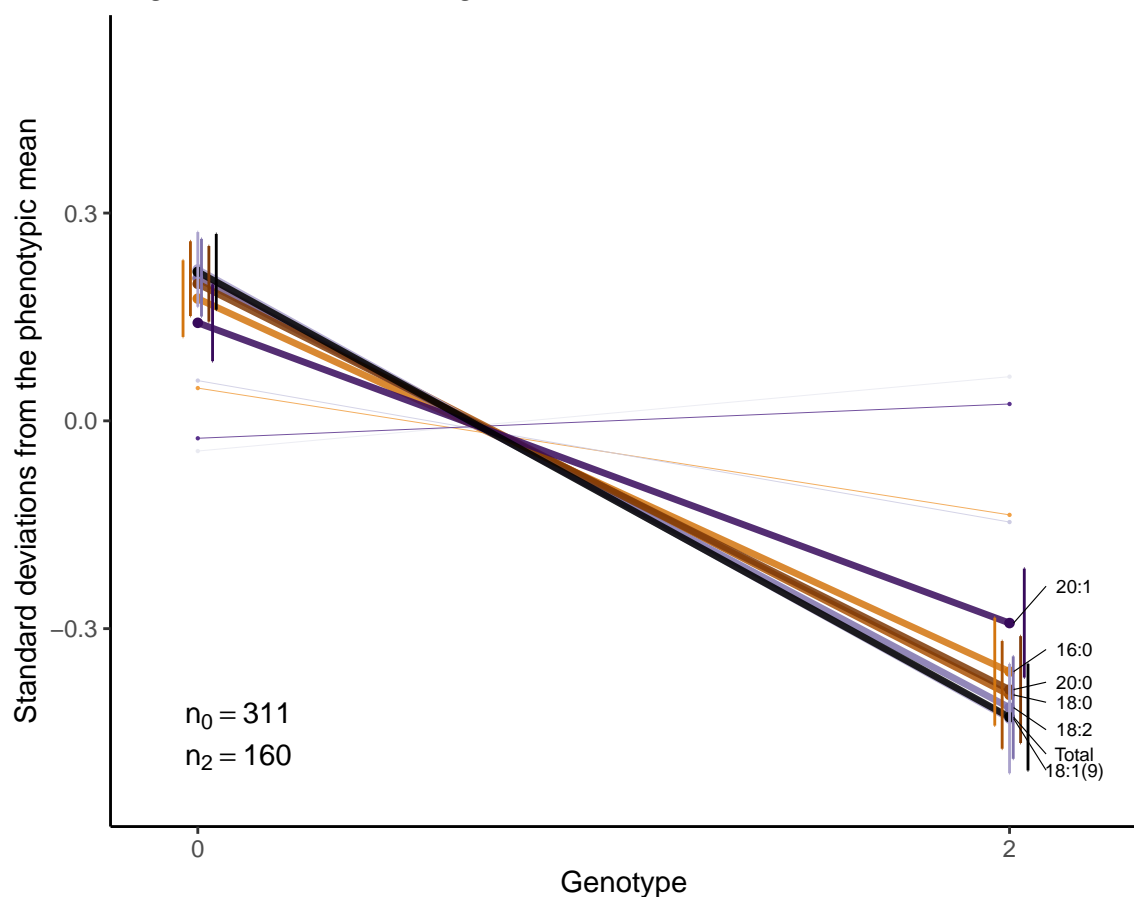

avgbs\_cluster\_1800.1.9 – Mrg05

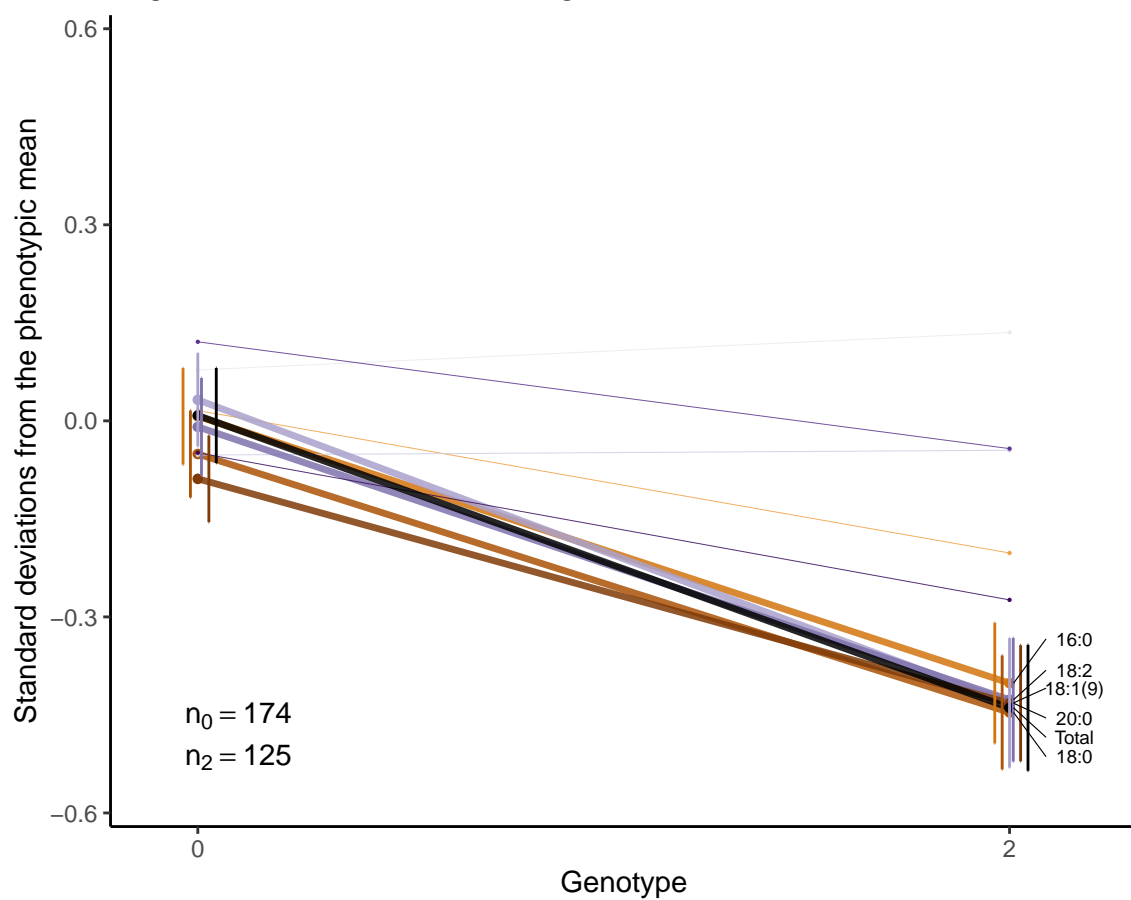

avgbs\_cluster\_11676.1.9 – Mrg05

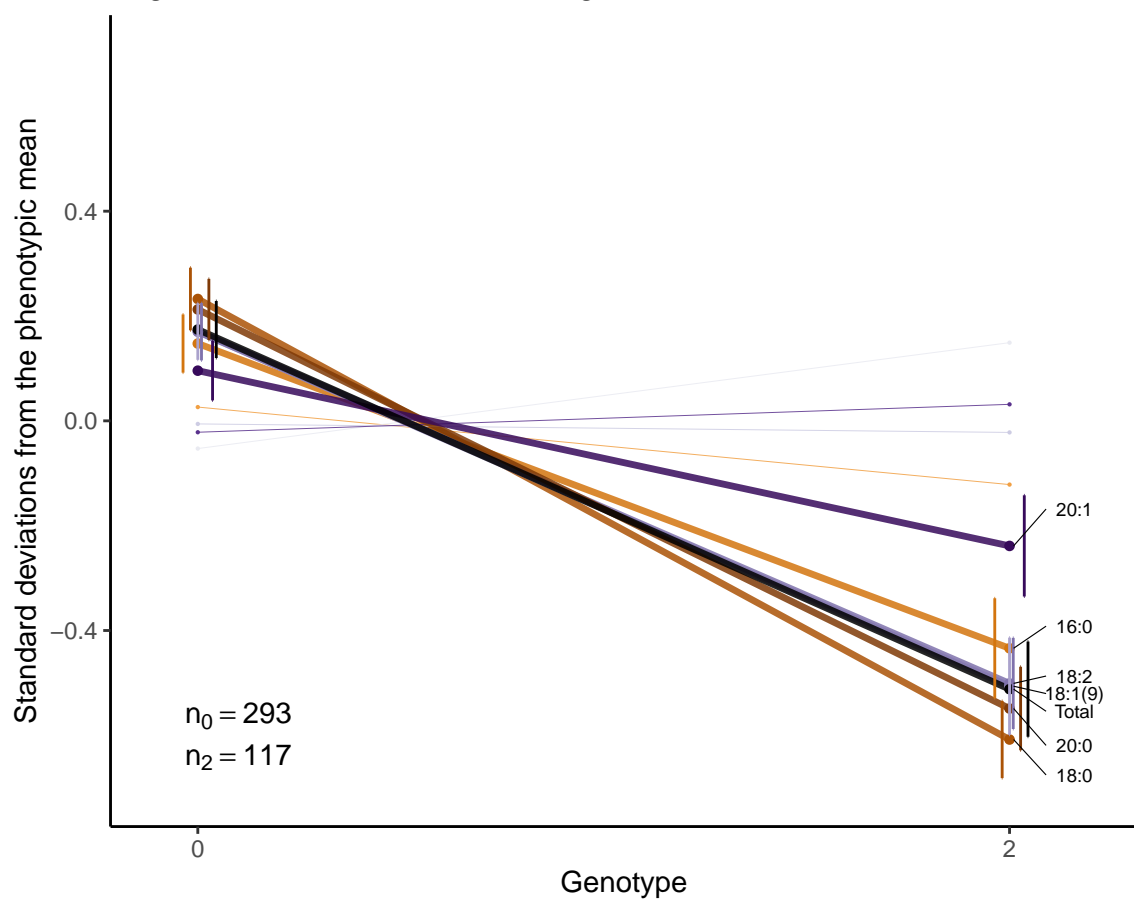

avgbs\_890.1.63 – Mrg05

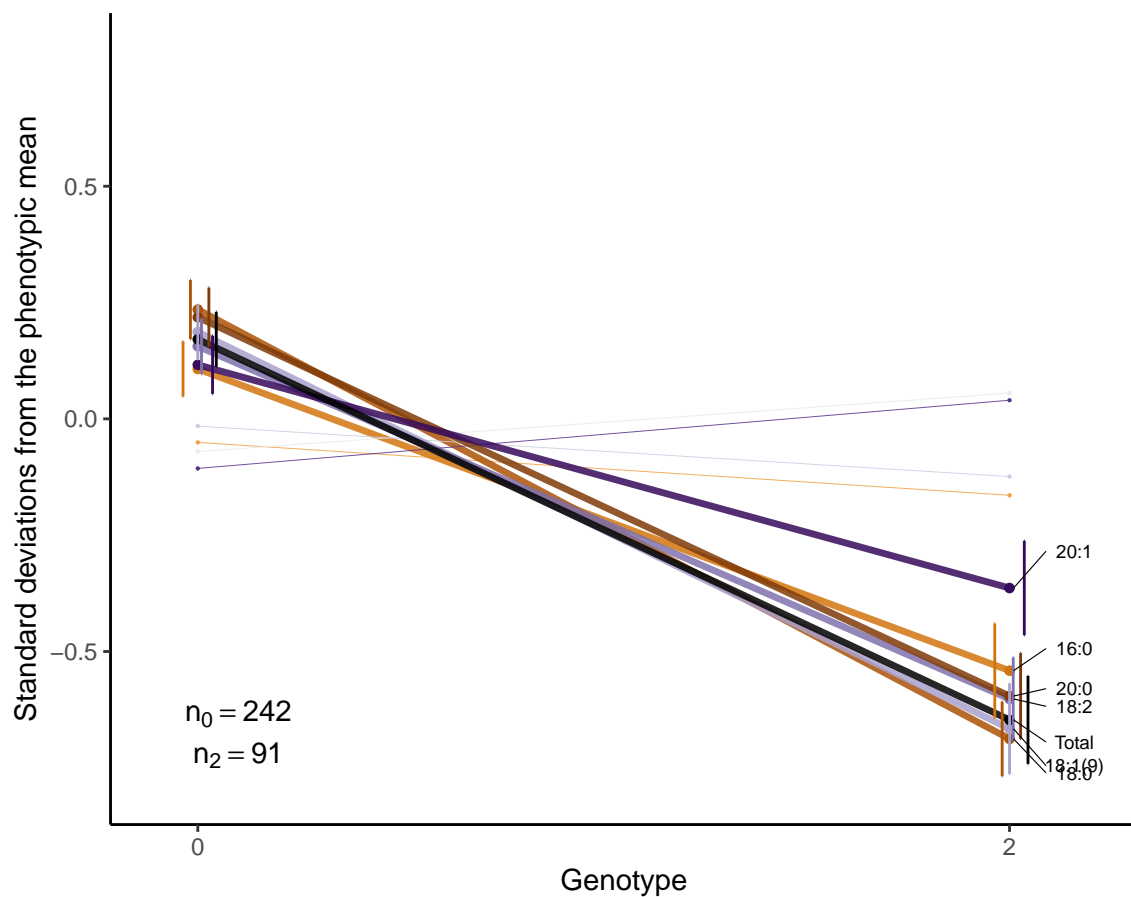

avgbs\_cluster\_11400.1.20 – Mrg05

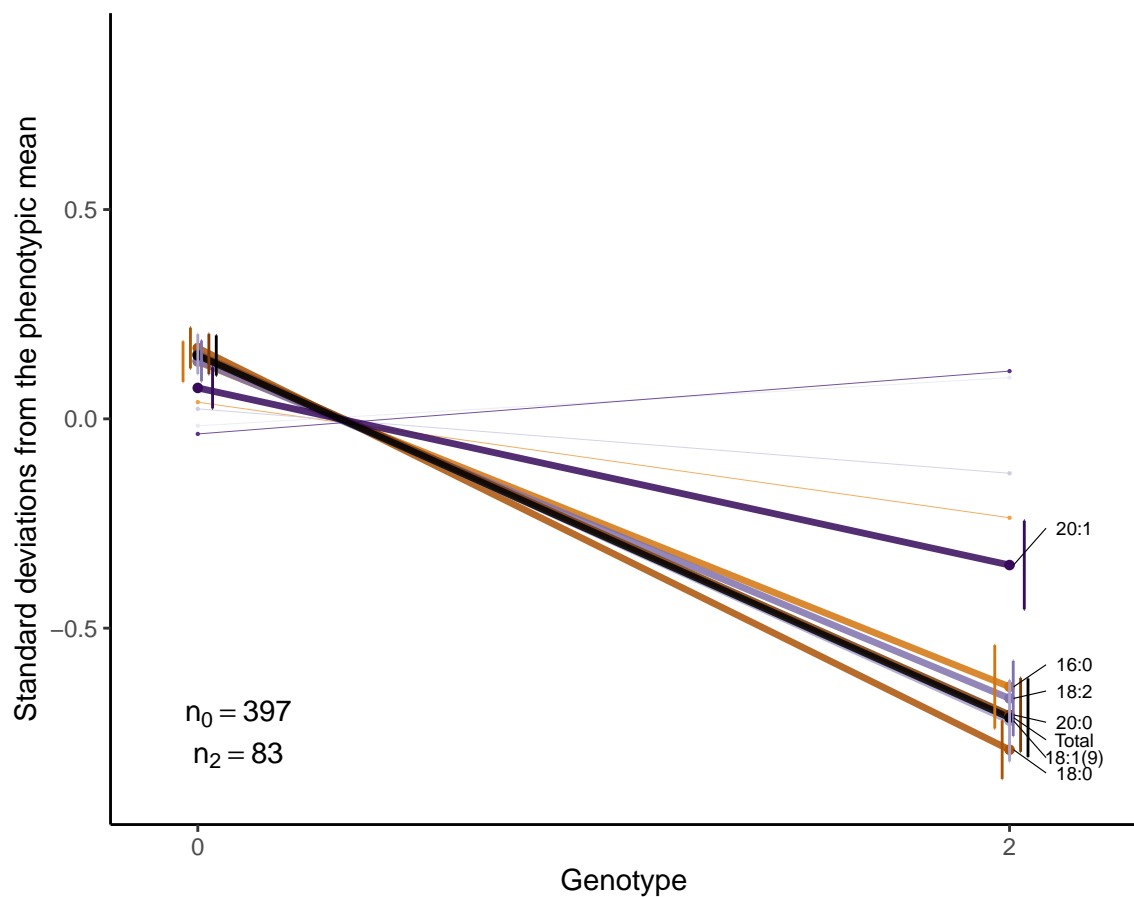

avgbs2\_116151.1.25 – Mrg05

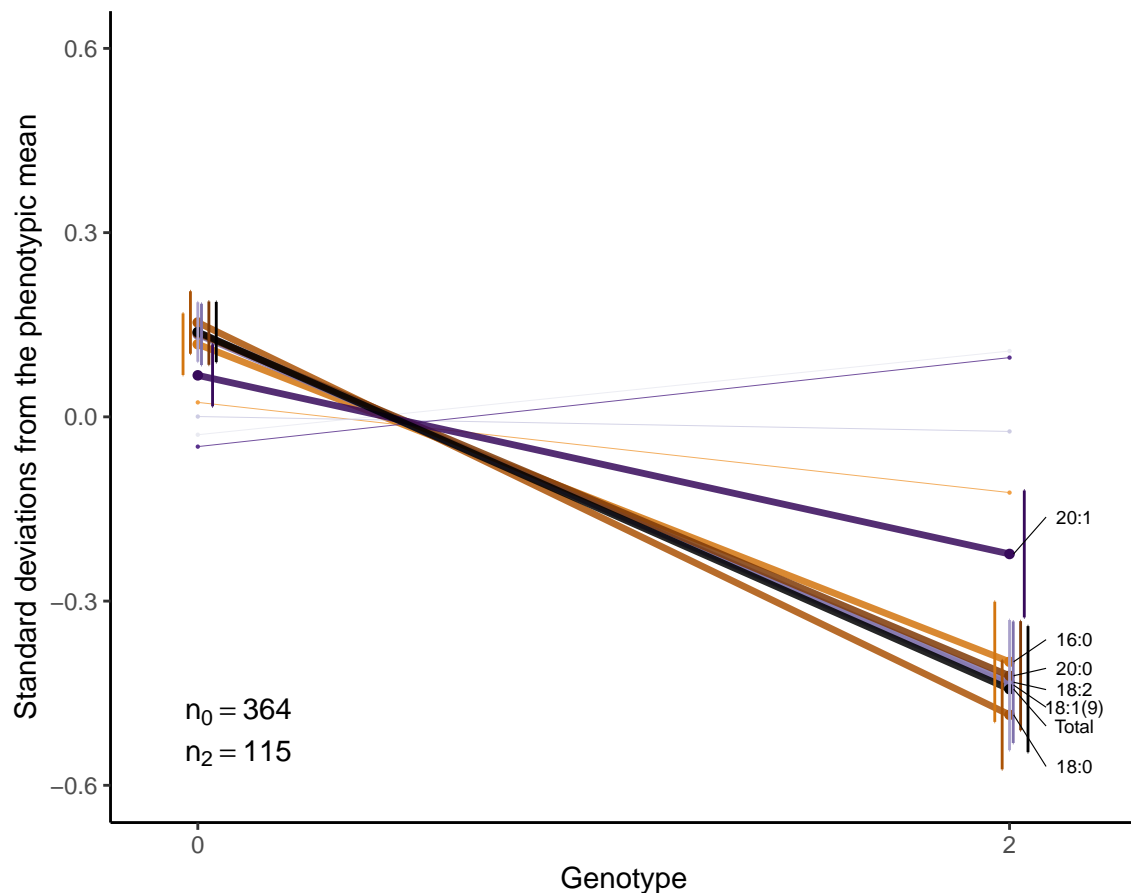

avgbs\_cluster\_31908.1.57 – Mrg05

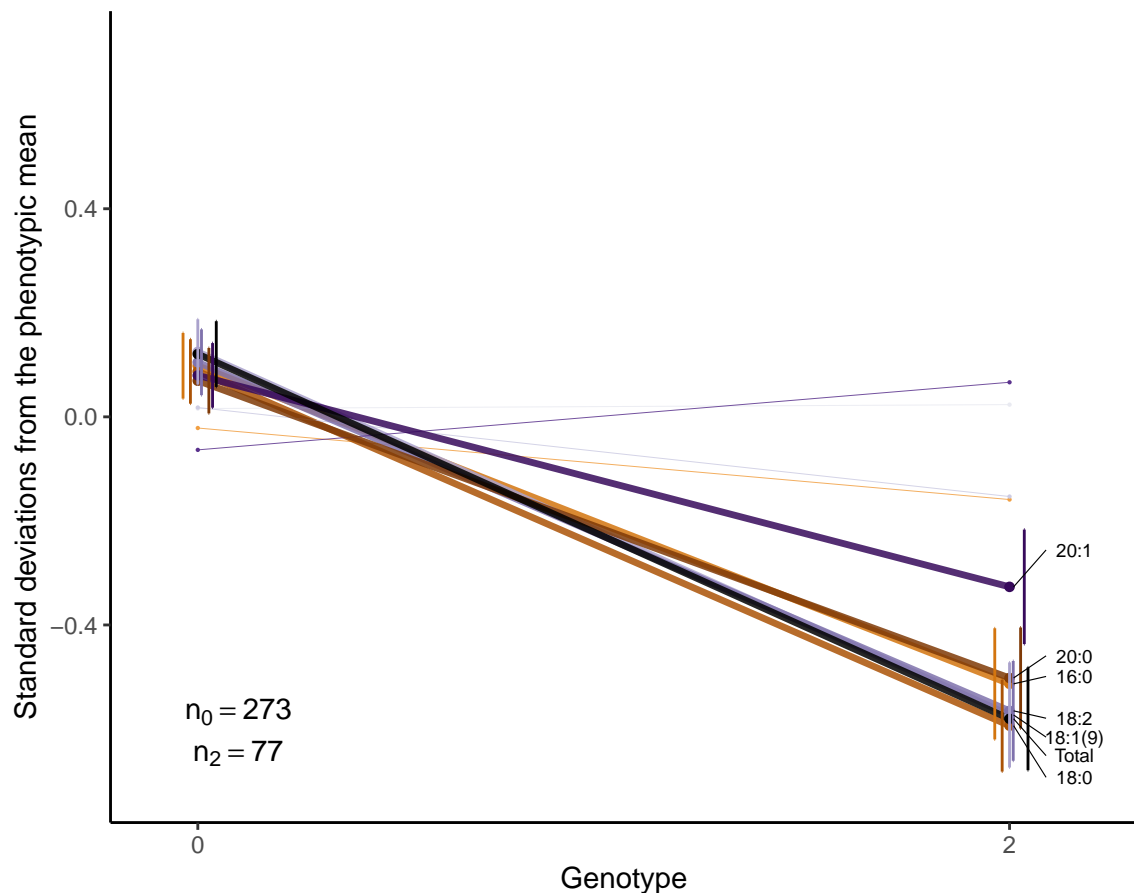

avgbs2\_187189.1.57 – Mrg05

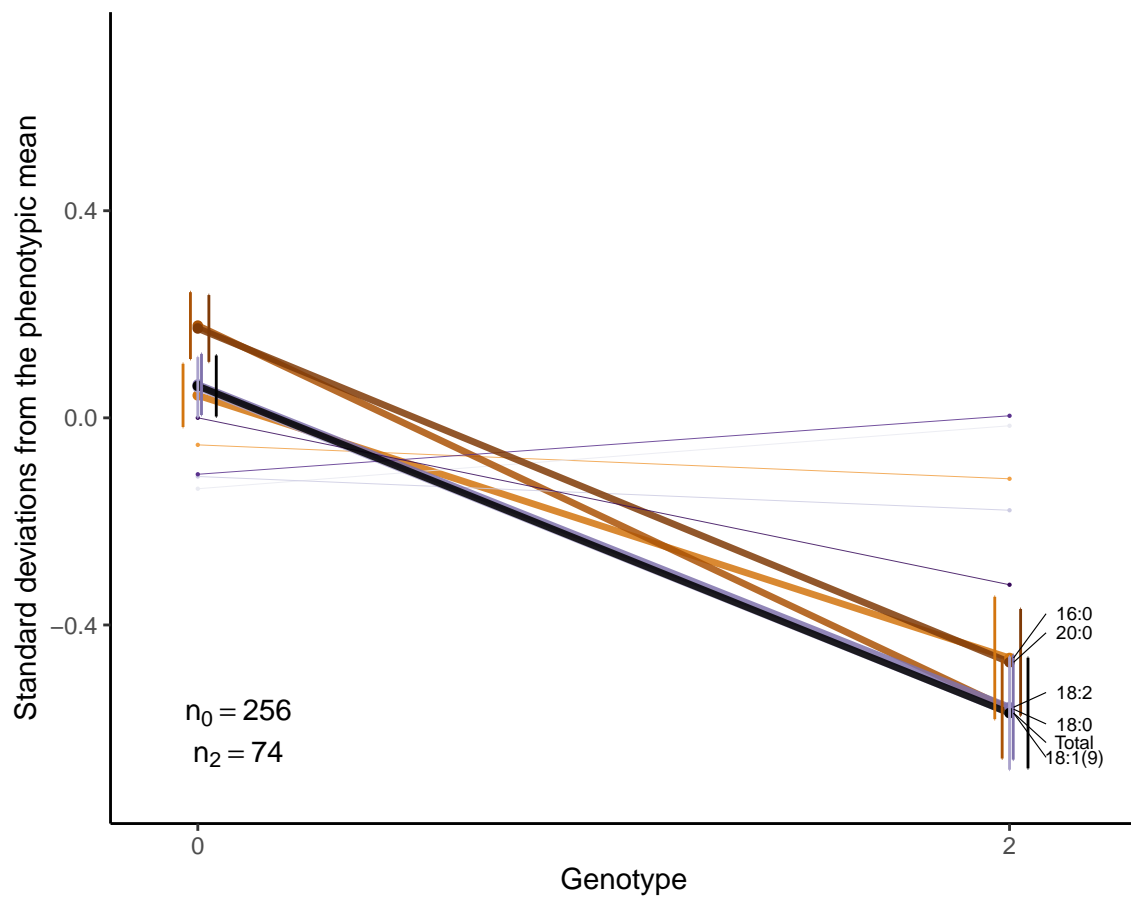

avgbs\_cluster\_1761.1.35 – Mrg05

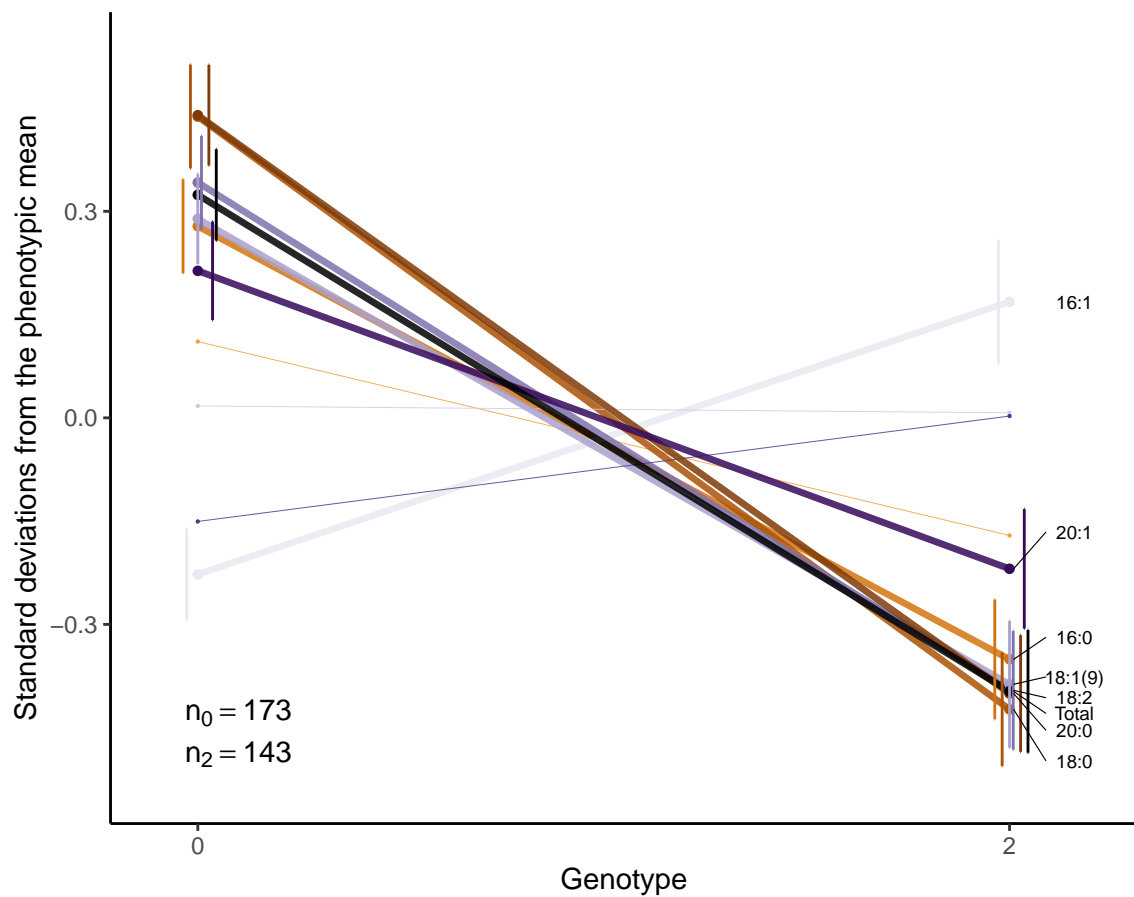

avgsb2\_187189.1.55 – Mrg05

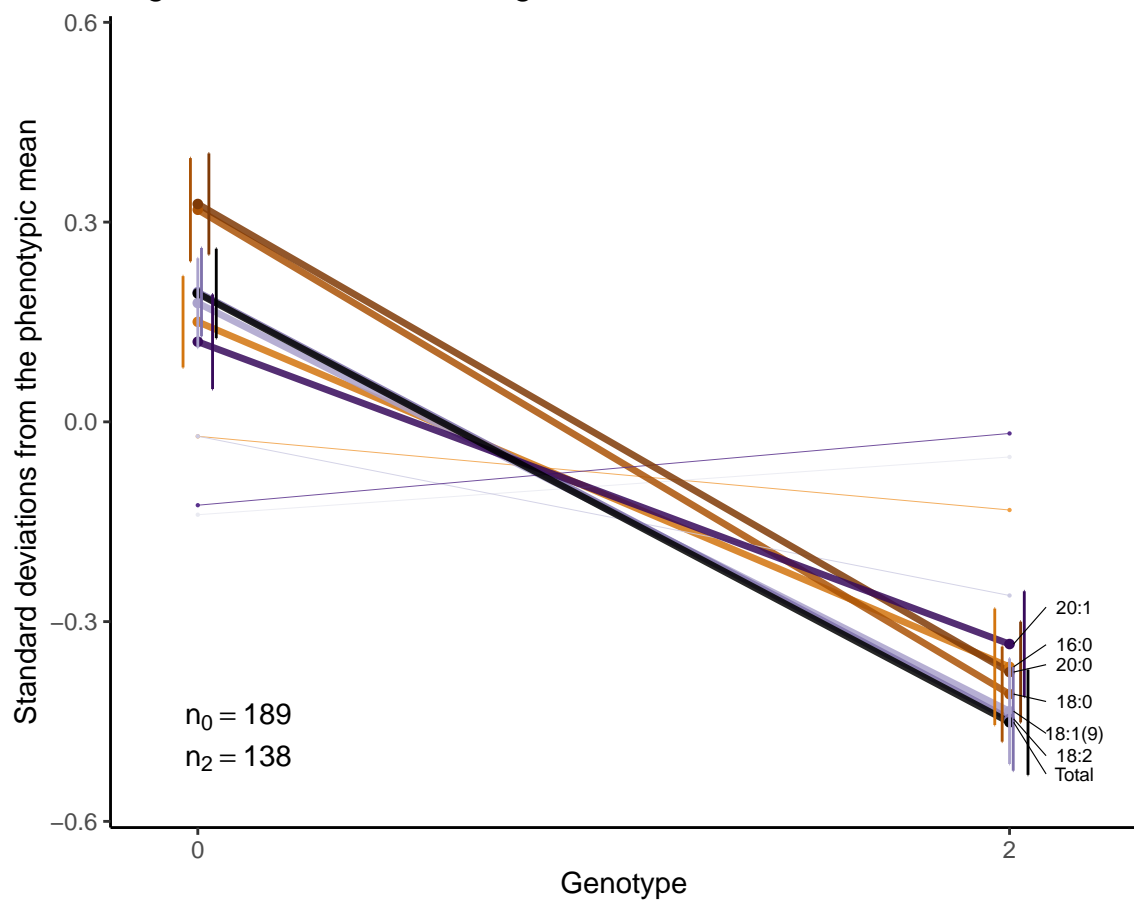

avgsb\_46950.1.50 – Mrg05

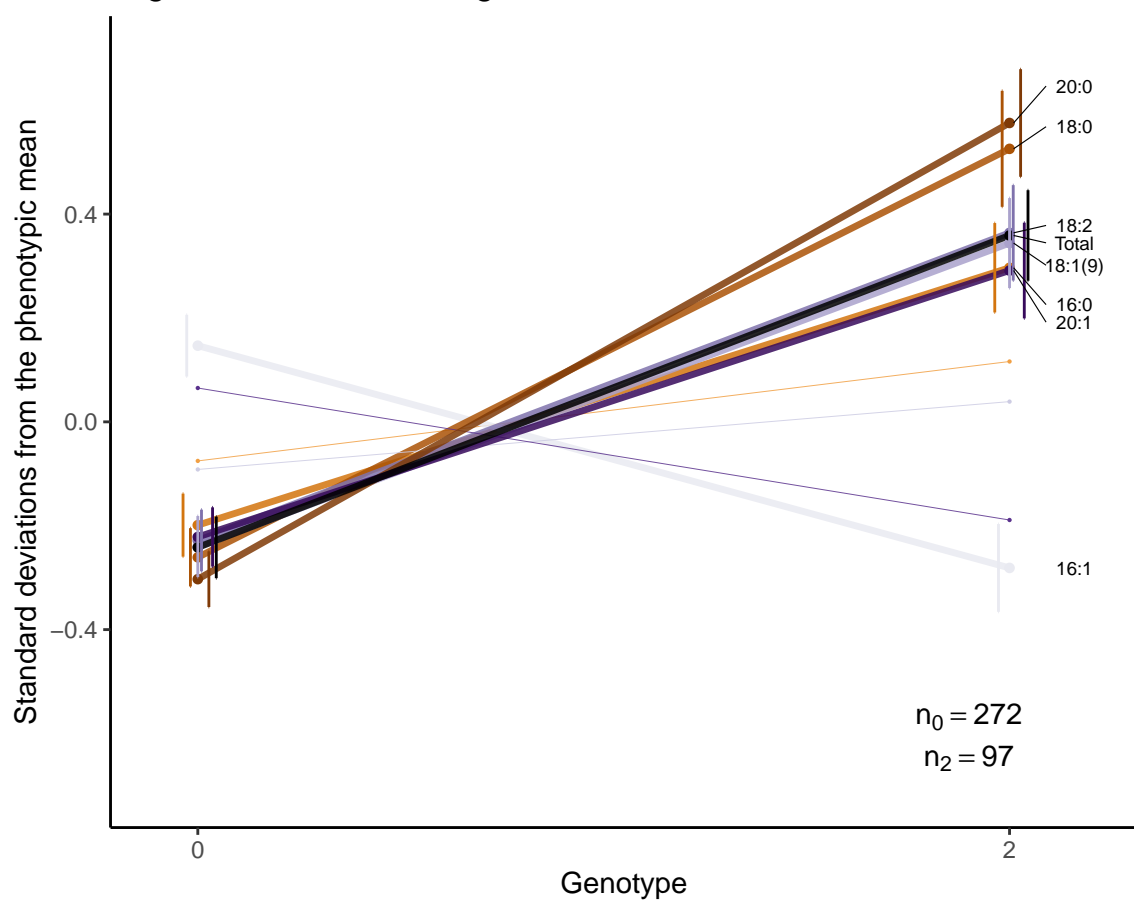

avgsb2\_2899.1.6 – Mrg05

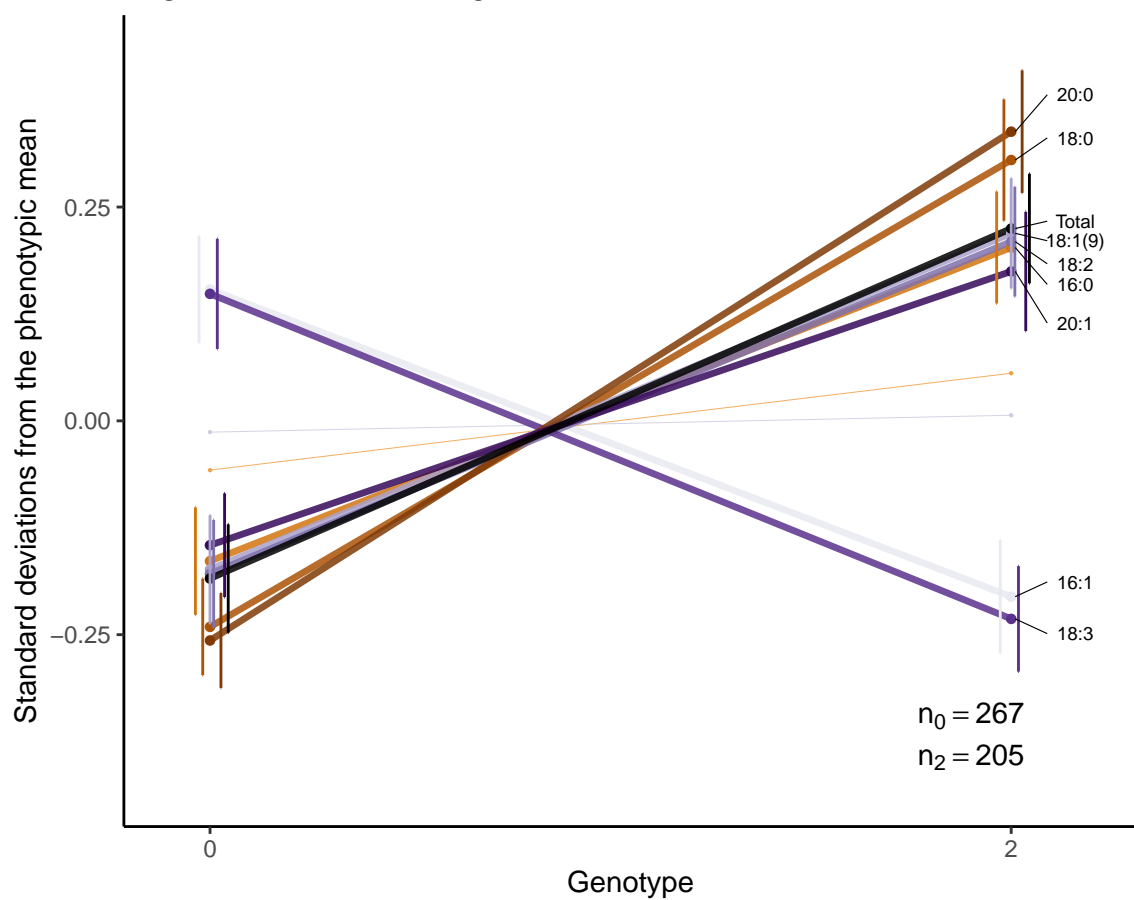

avgsb\_cluster\_39326.1.20 – Mrg05

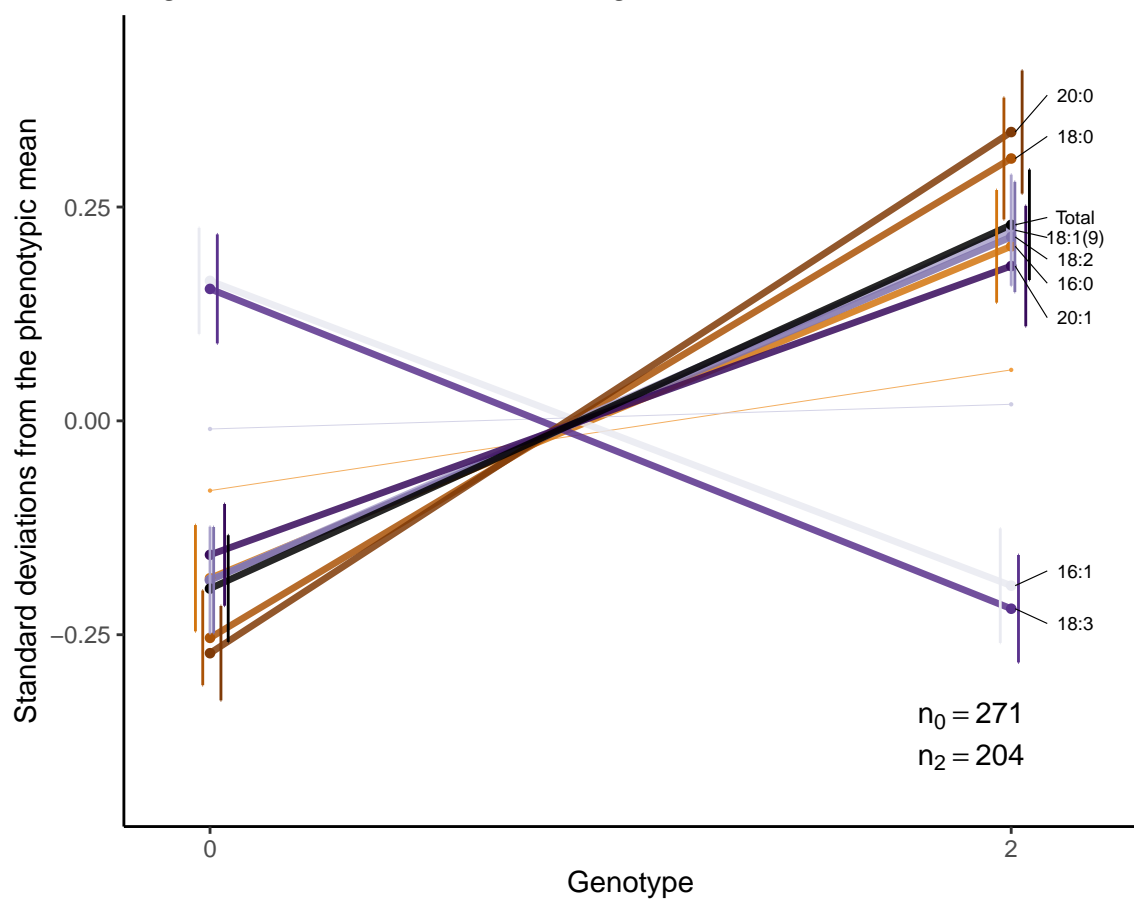

avgsb2\_164105.1.29 – Mrg05

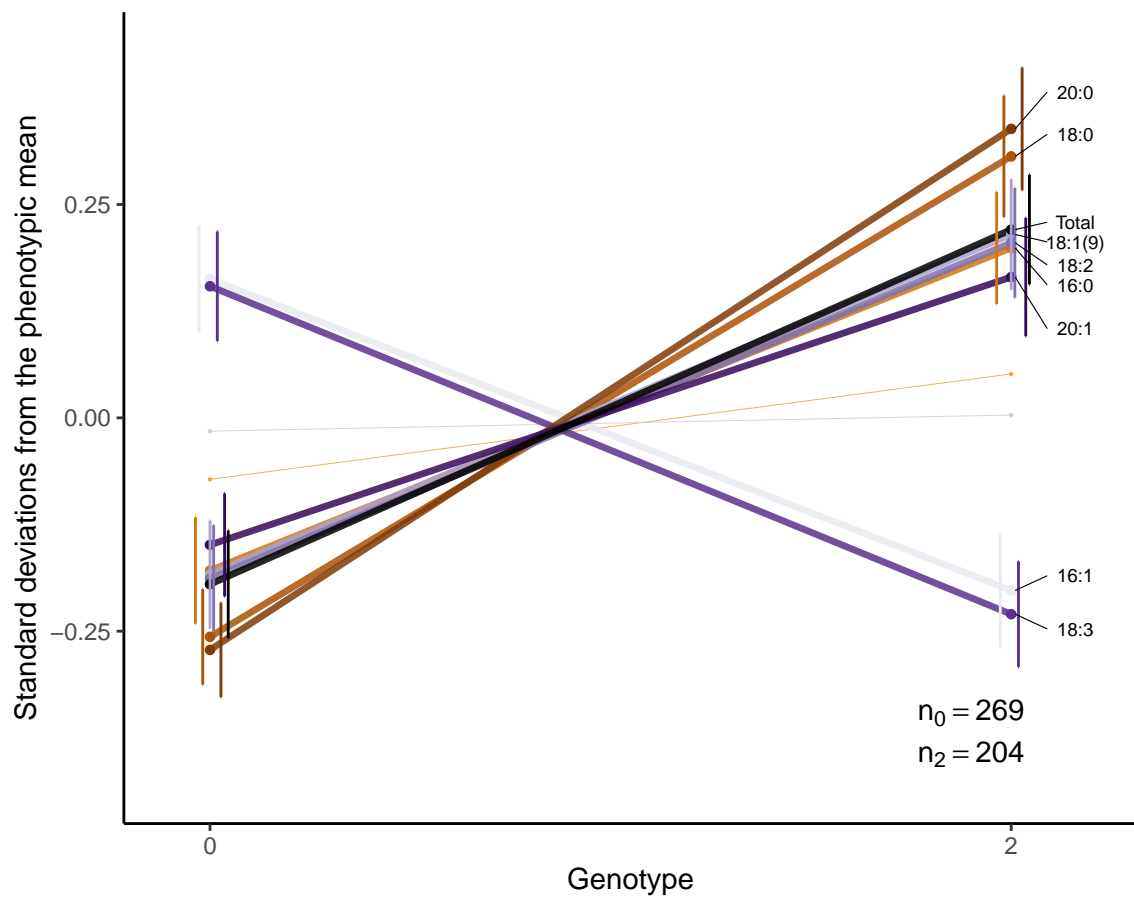

avgsb\_cluster\_355.1.16 – Mrg05

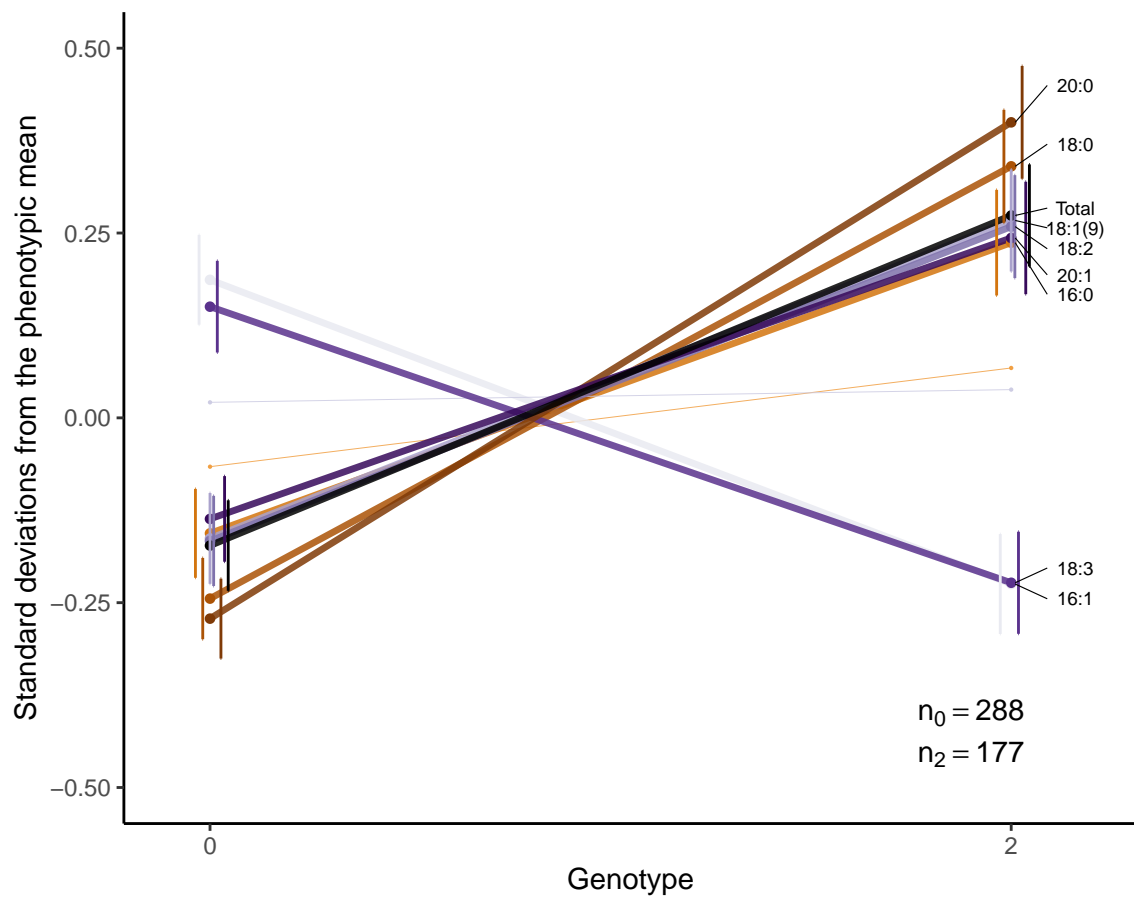

avgbs2\_146048.1.35 – Mrg05

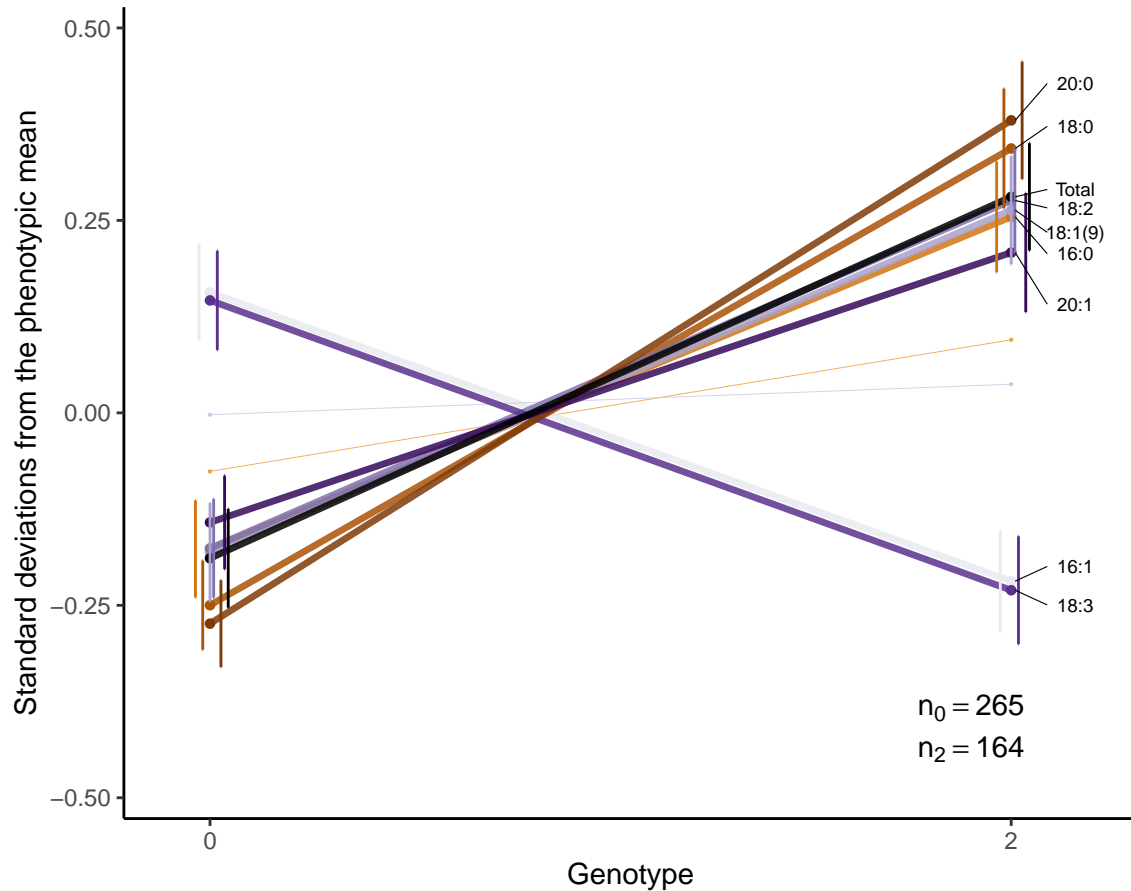

avgbs\_cluster\_43160.1.36 – Mrg05

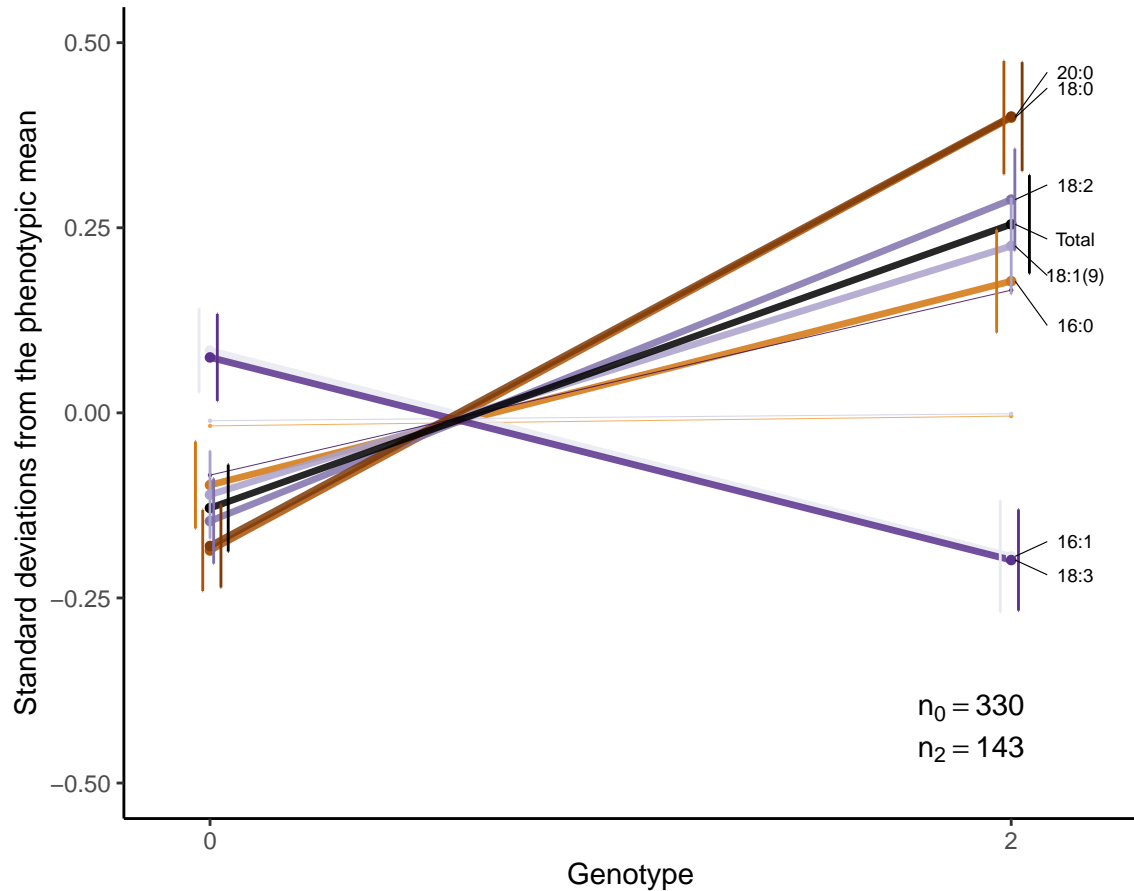

avgbs2\_57641.1.23 – MrgNA

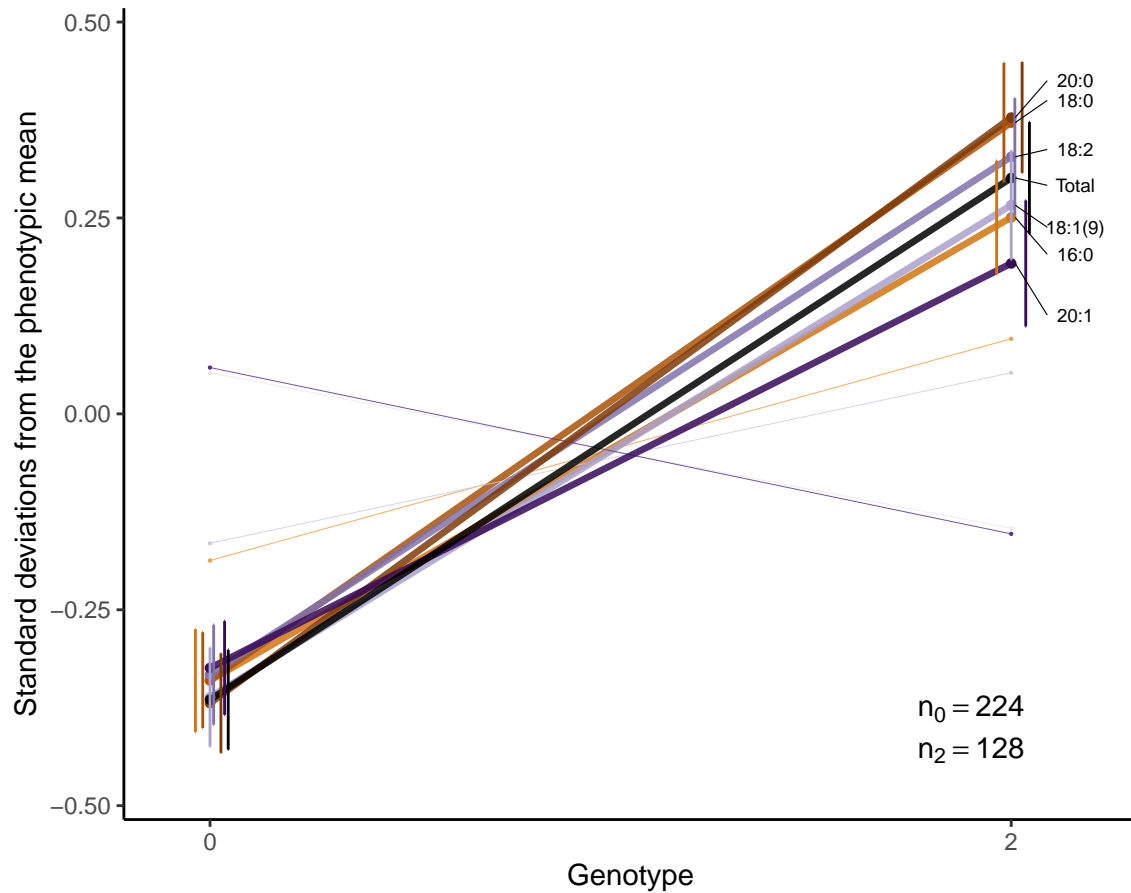

avgbs\_97451.1.11 – Mrg05

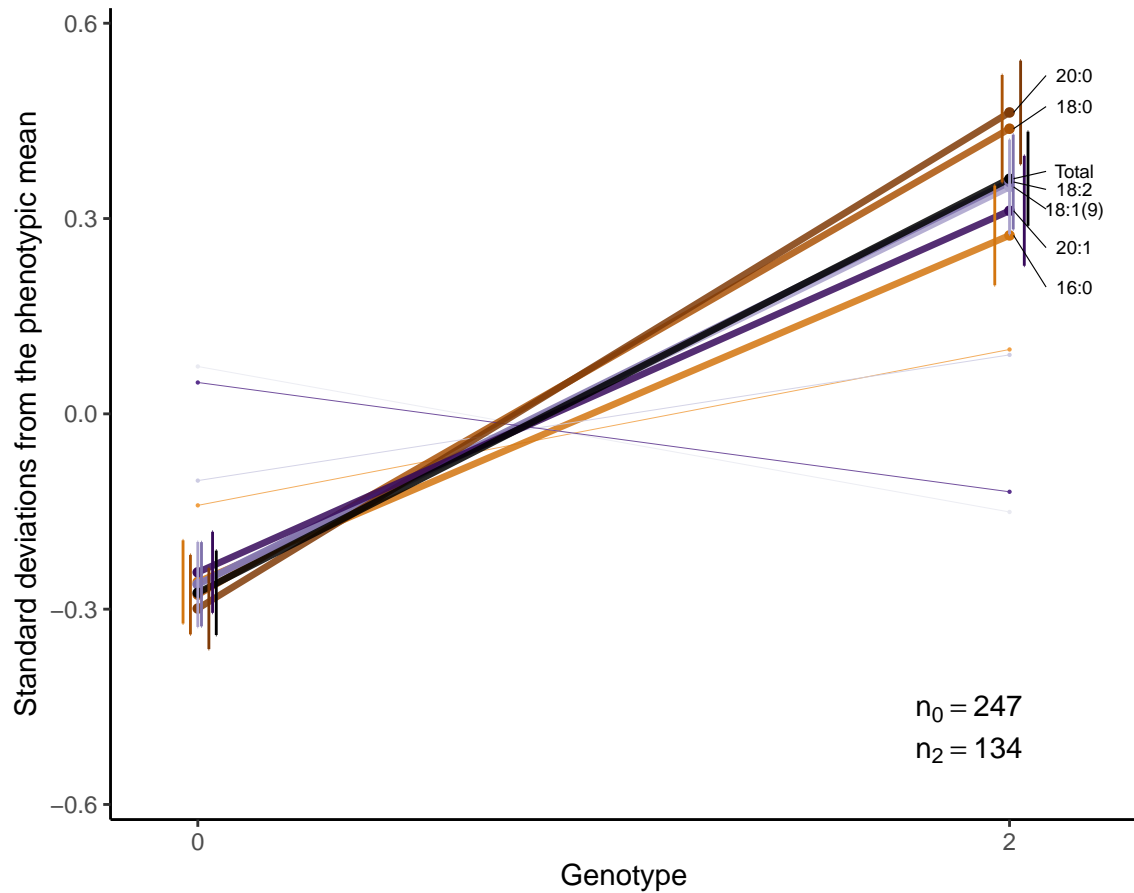

avgbs\_cluster\_62.1.60 – Mrg05

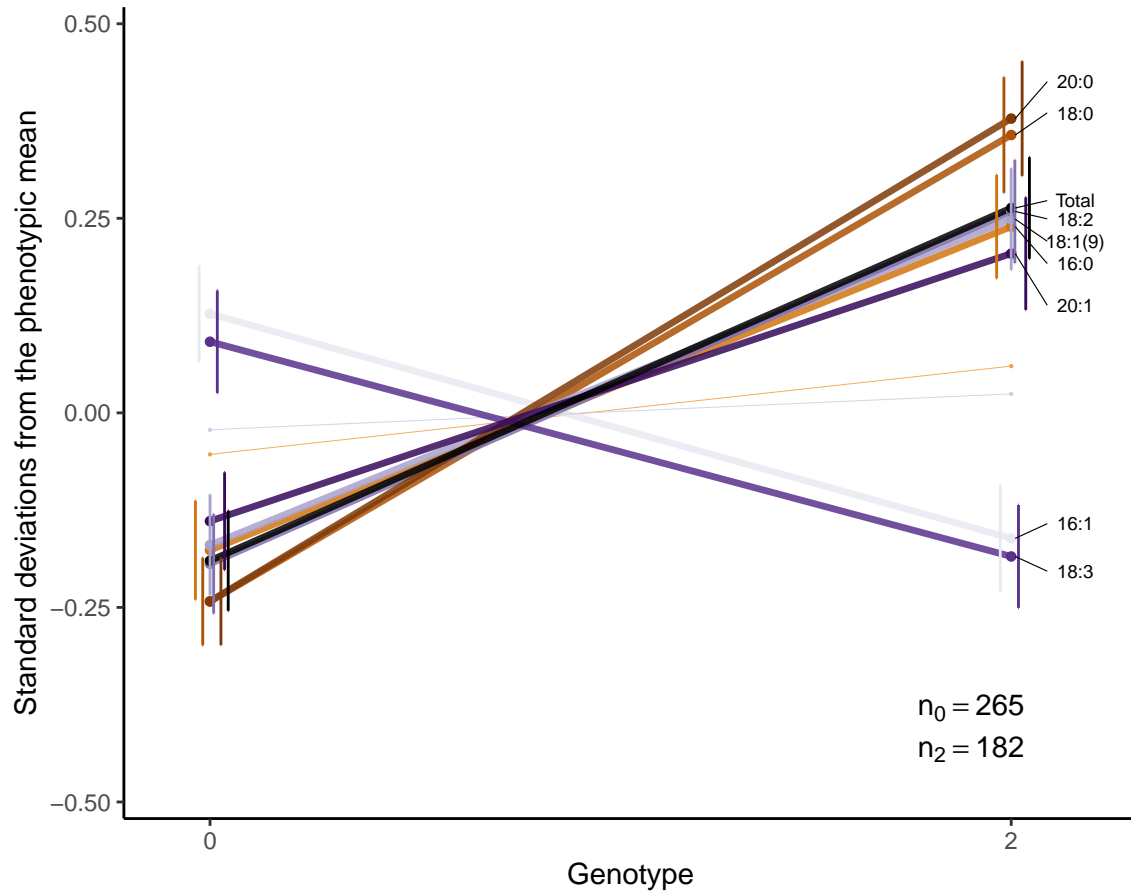

avgbs\_cluster\_23271.1.33 – Mrg05

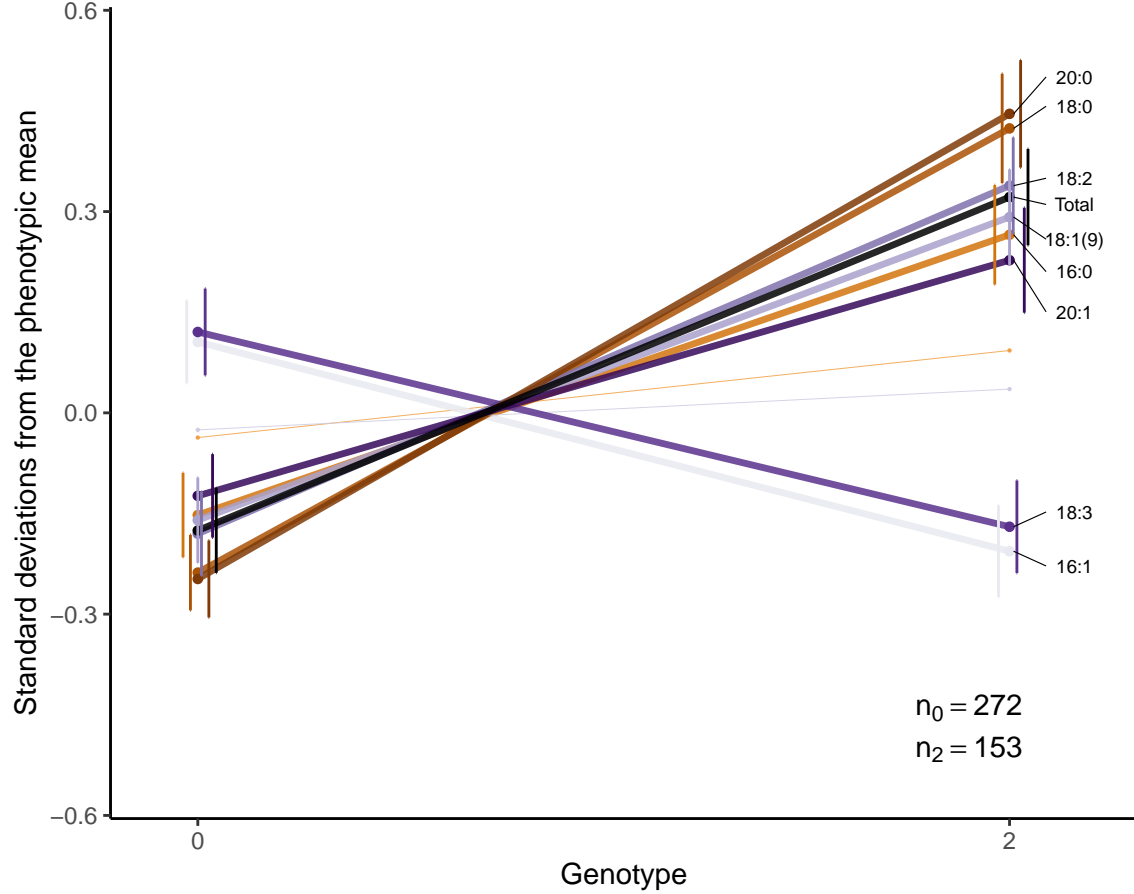

avgs2\_109044.1.33 – Mrg05

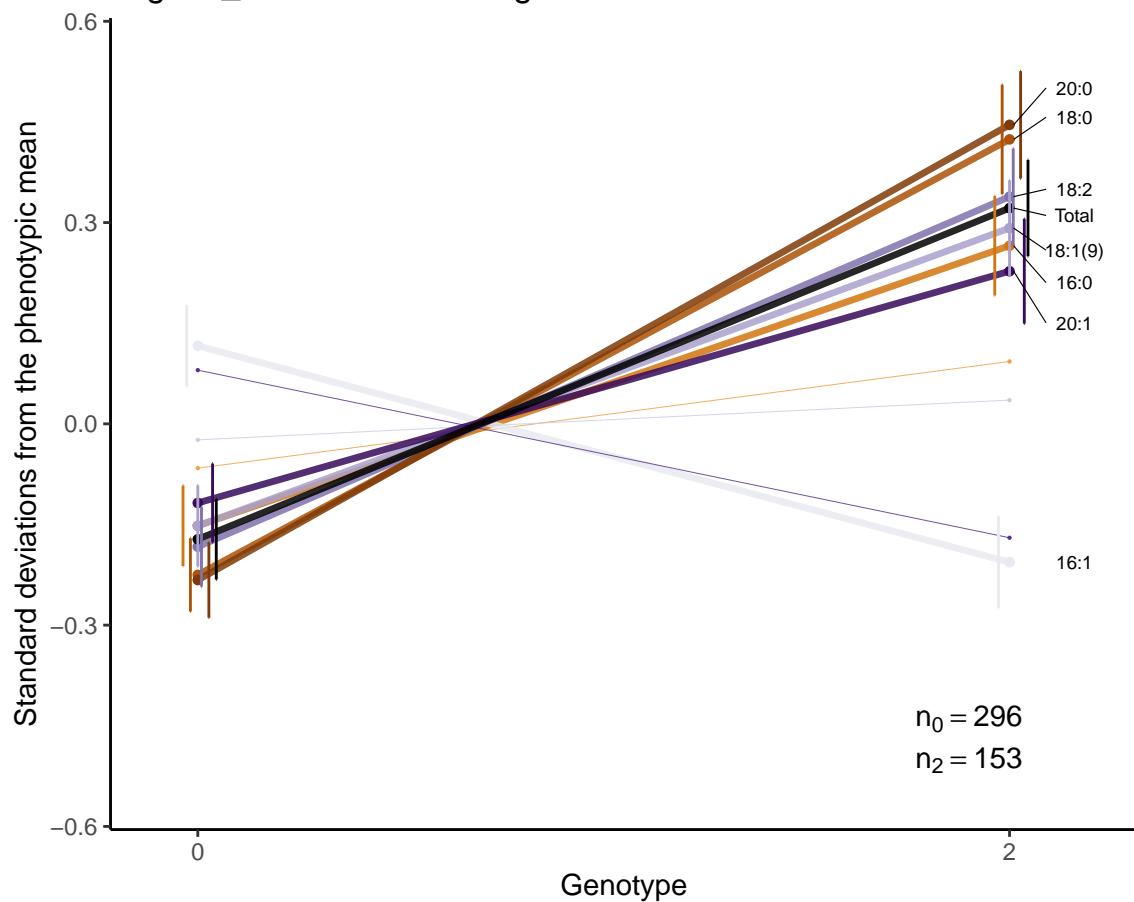

avgs2\_135653.1.33 – Mrg05

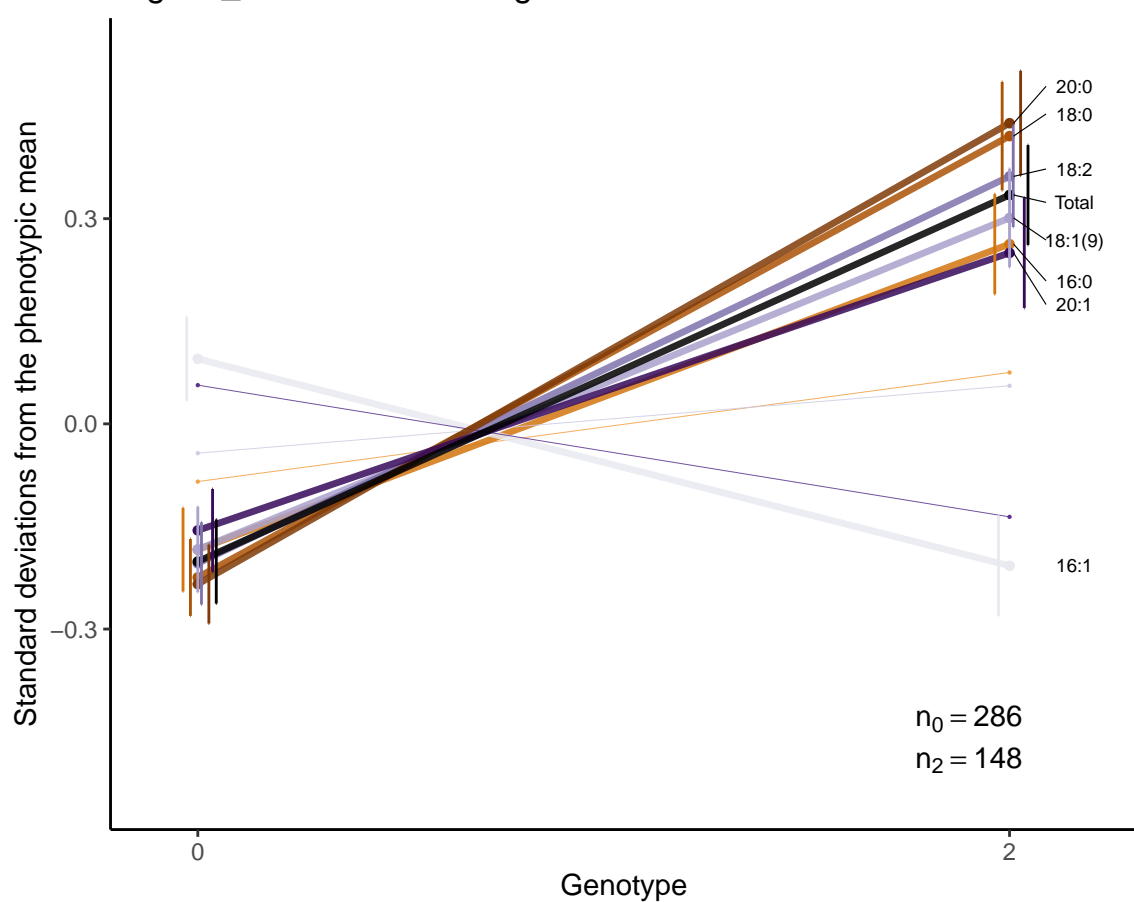

avgs\_cluster\_6260.1.61 – MrgNA

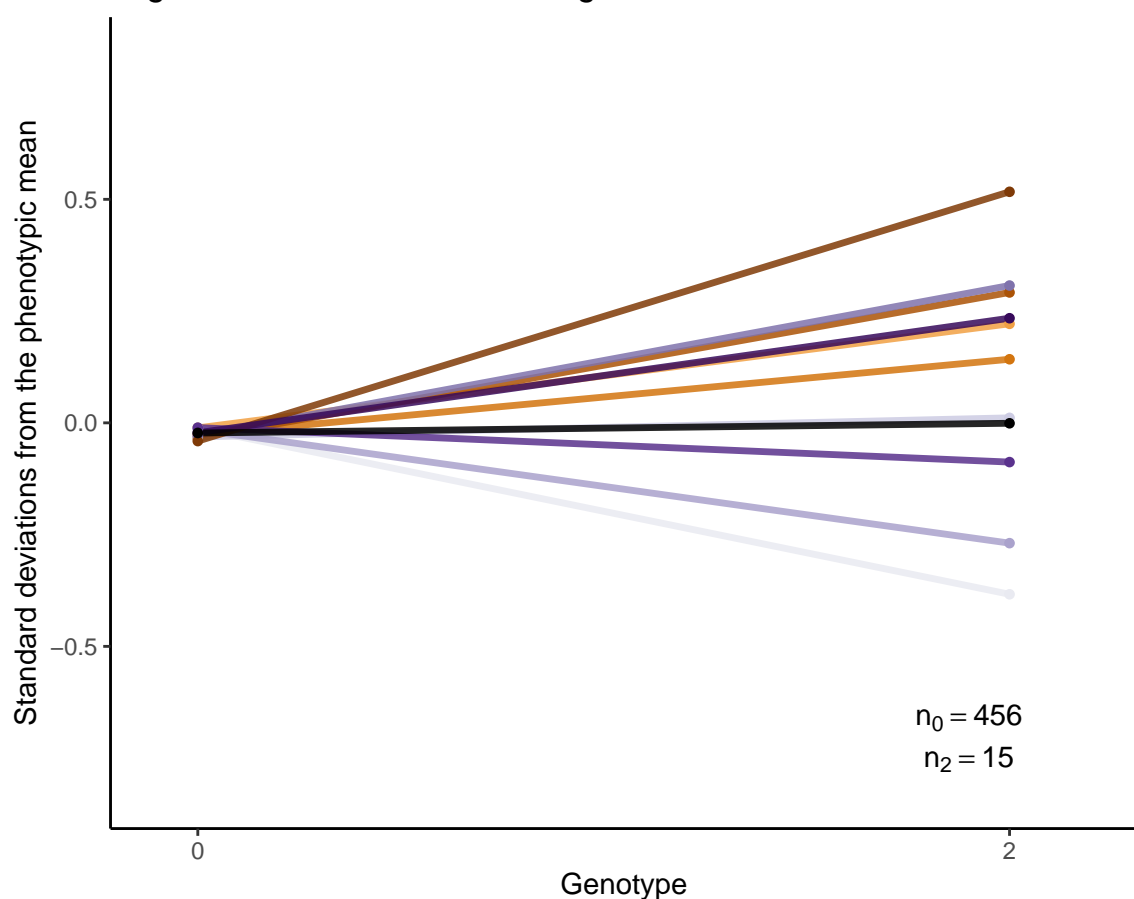

avgs\_cluster\_11939.1.53 – MrgNA

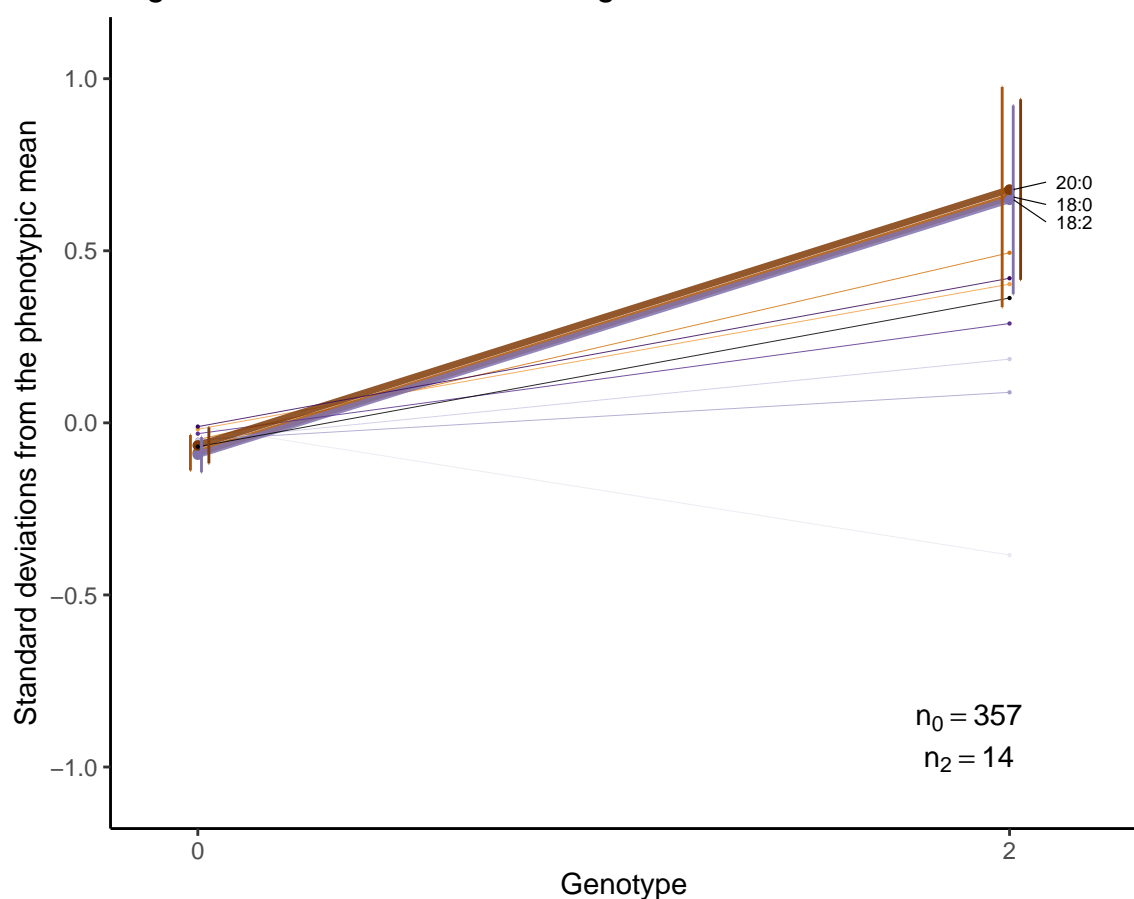

avgs\_cluster\_37648.1.27 – MrgNA

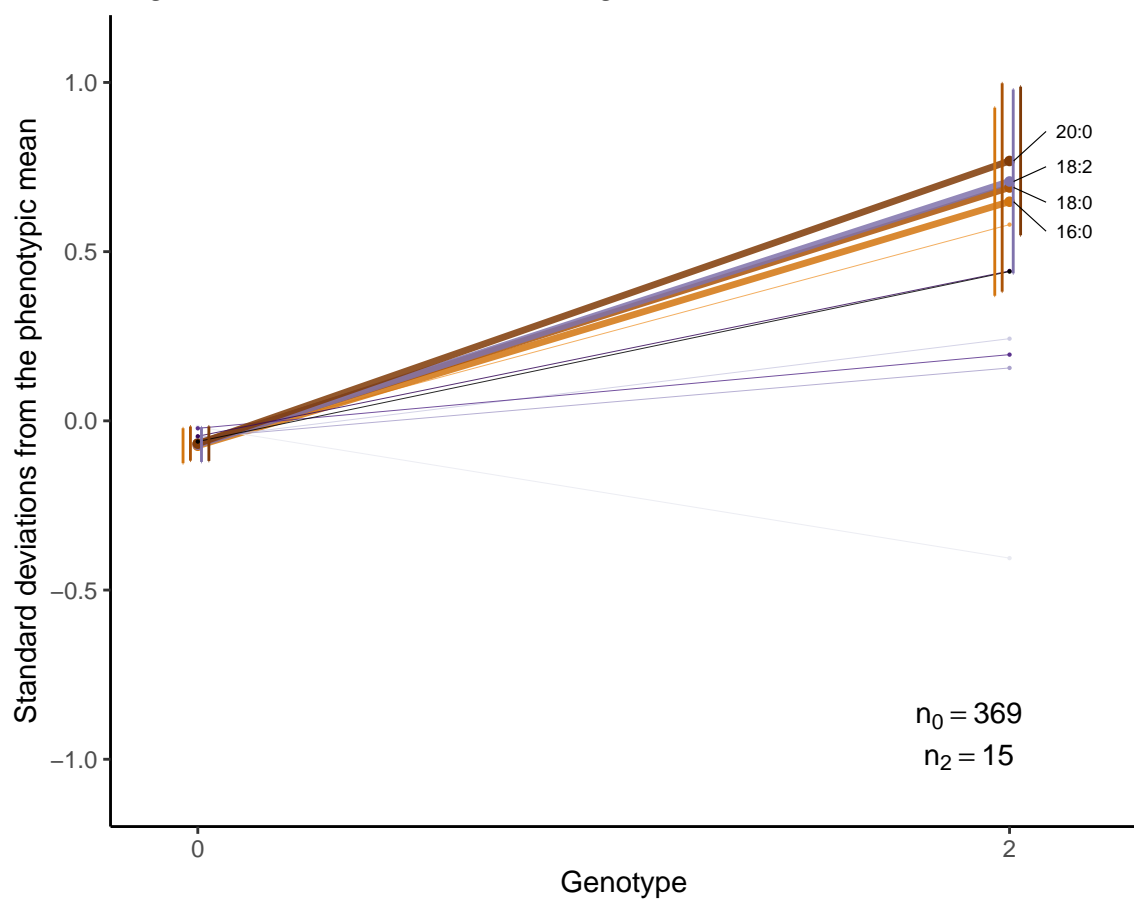

avgs\_cluster\_16599.1.46 – MrgNA

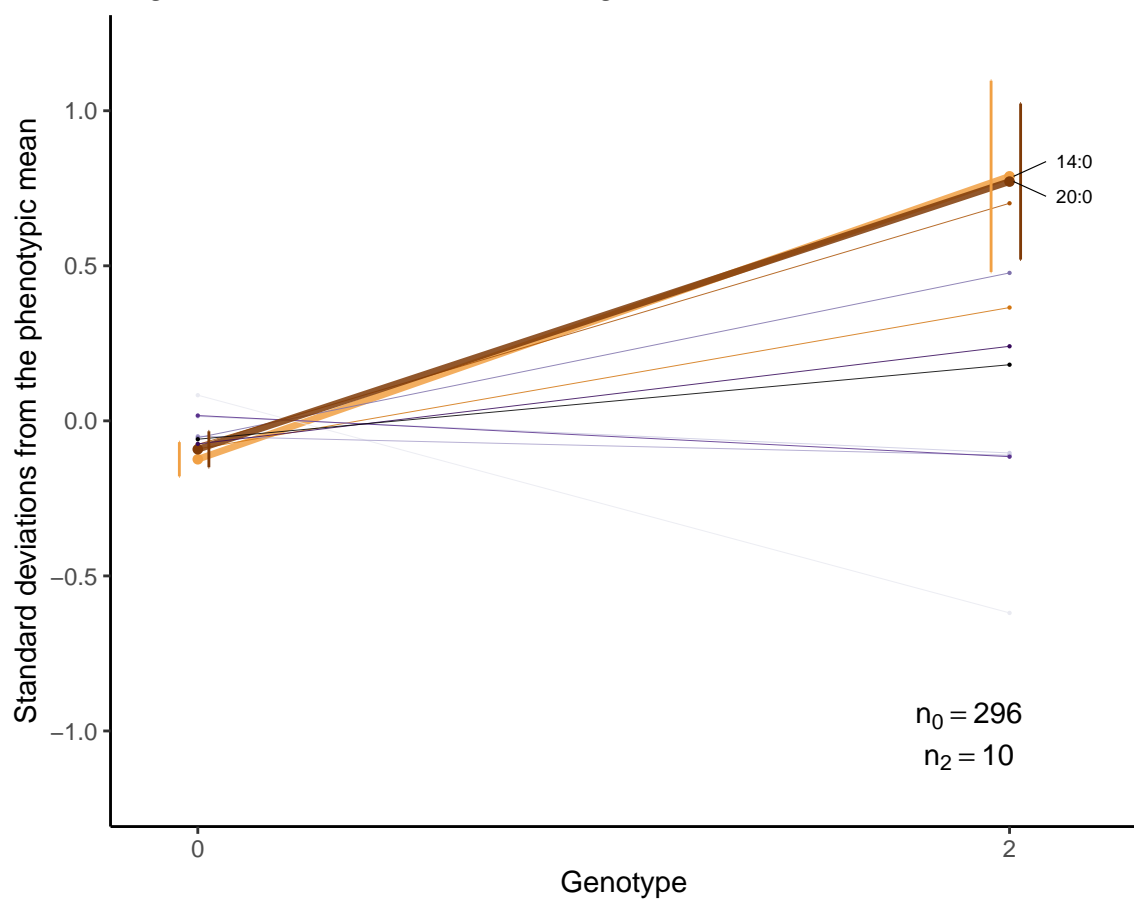



avgbs\_309890.1.57 – MrgNA

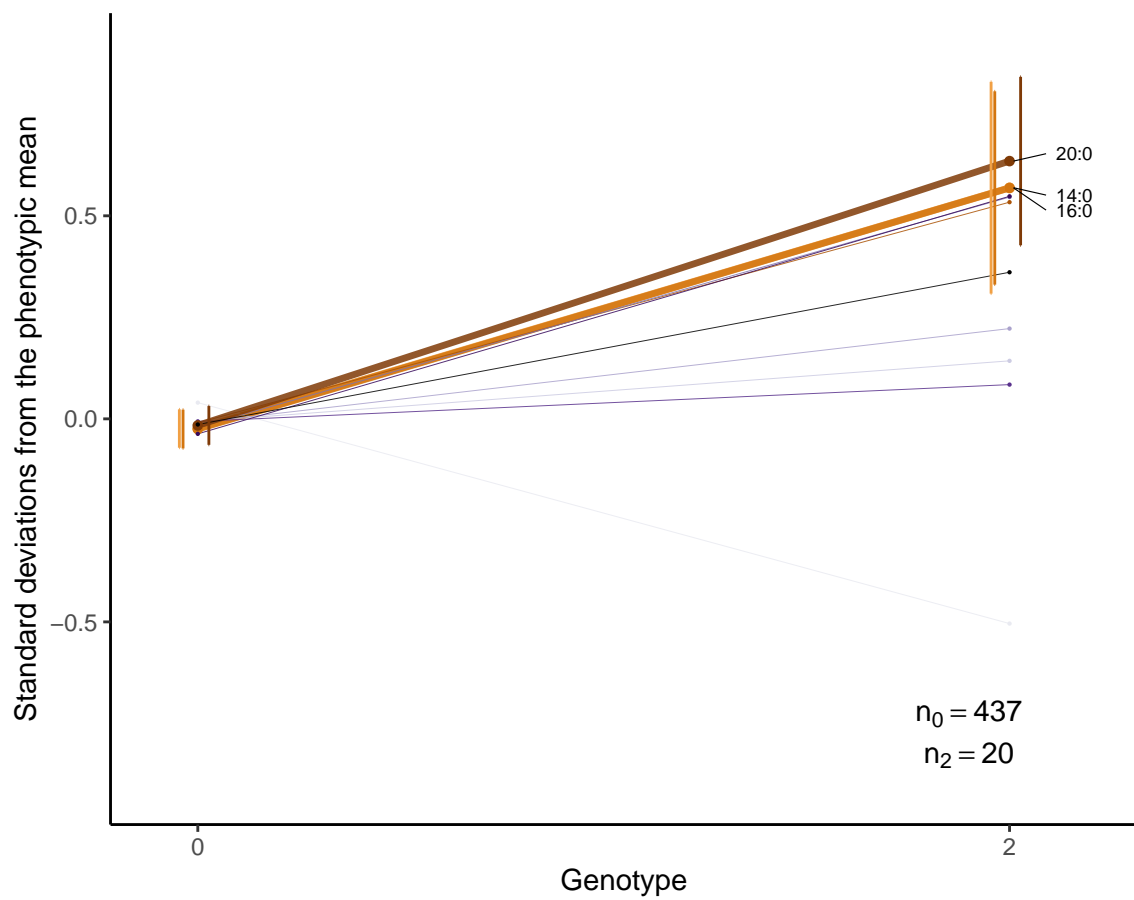

avgbs\_106254.1.18 – MrgNA

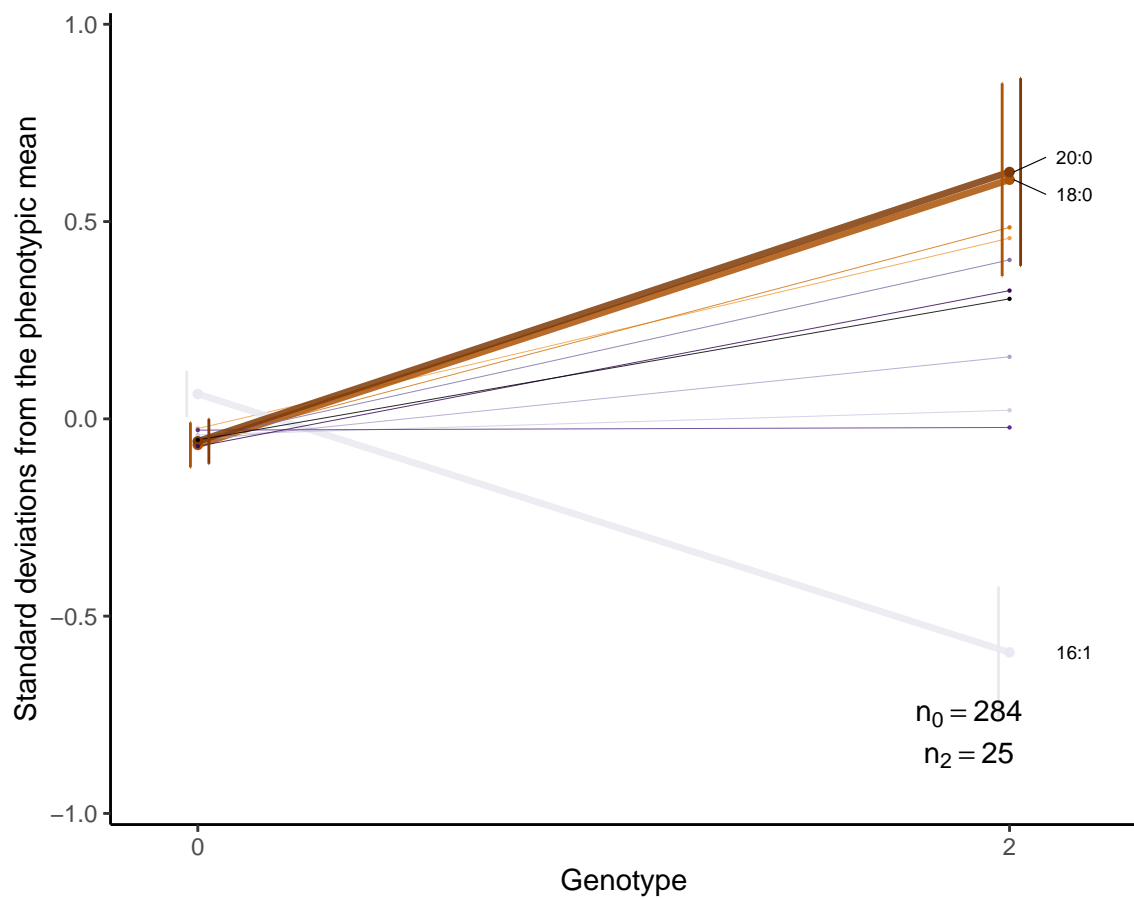

avgbs\_47748.1.28 – MrgNA

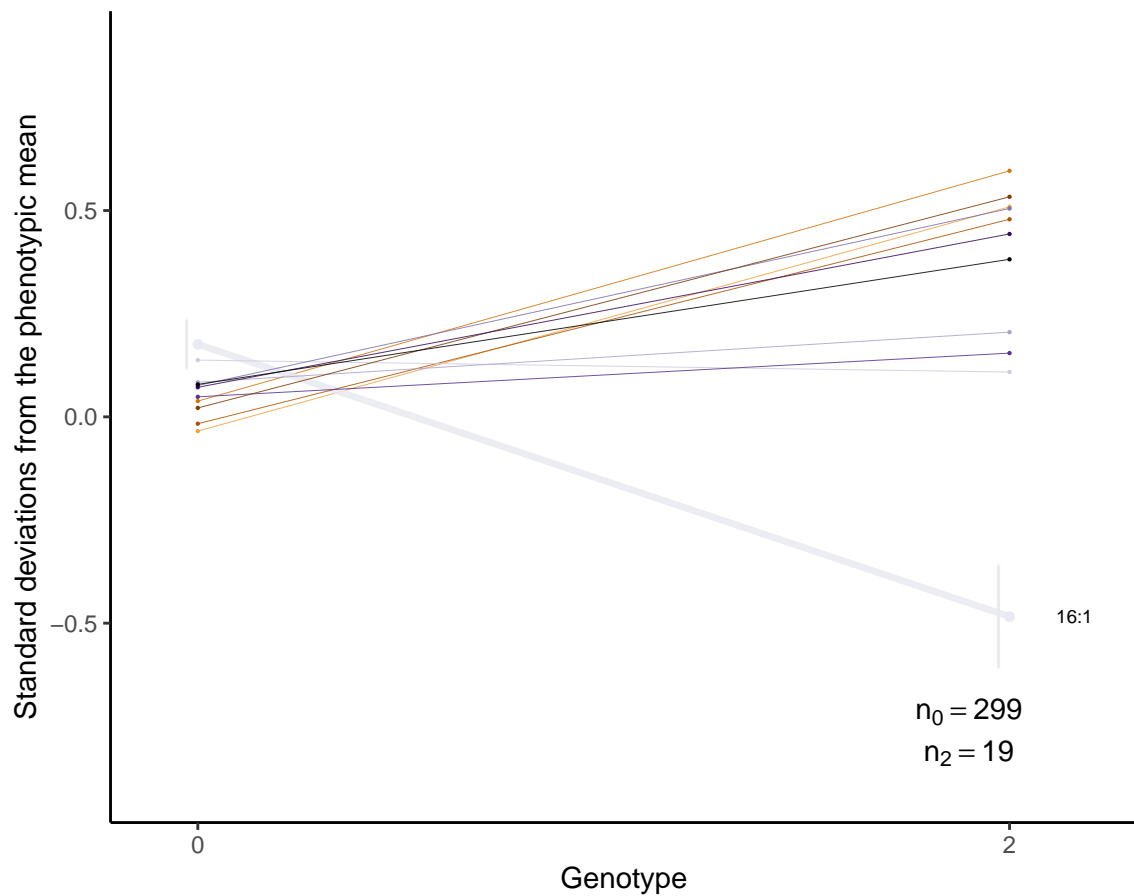

avgbs\_68727.1.18 – MrgNA

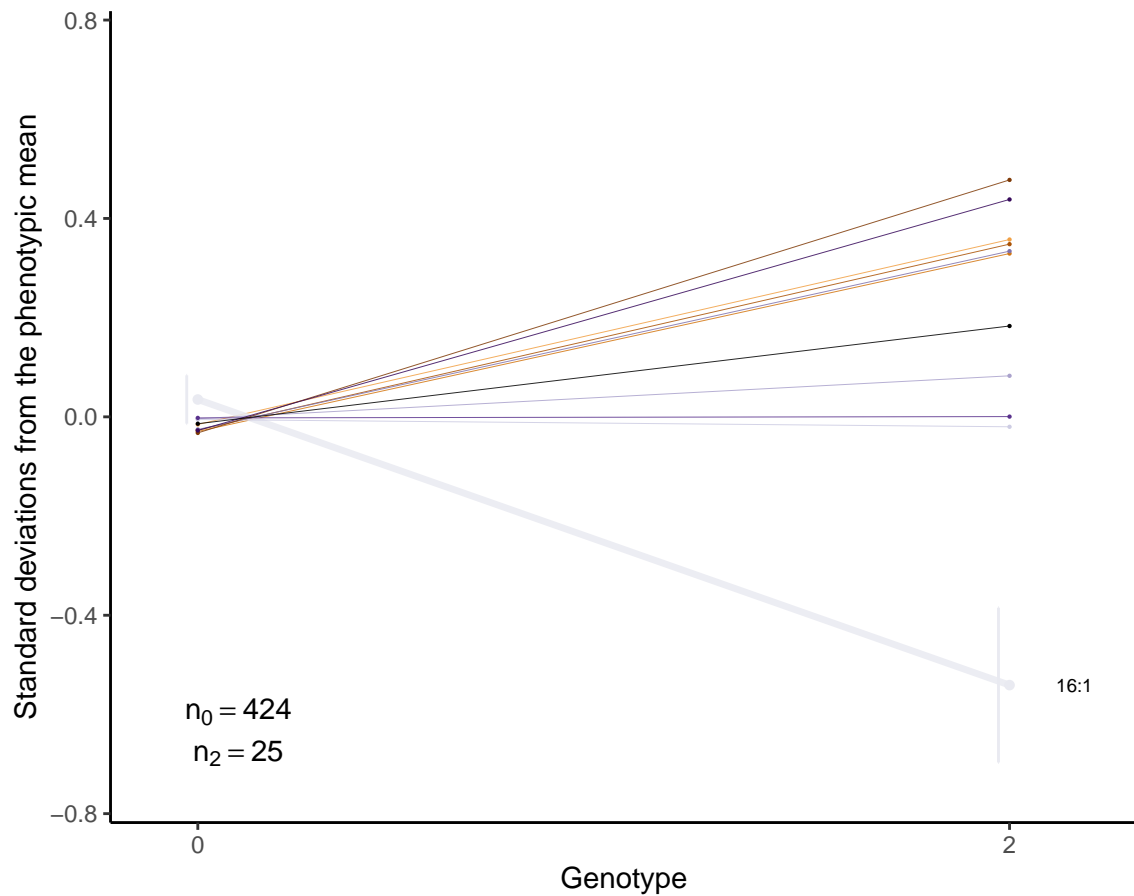

avgbs2\_94707.1.64 – MrgNA

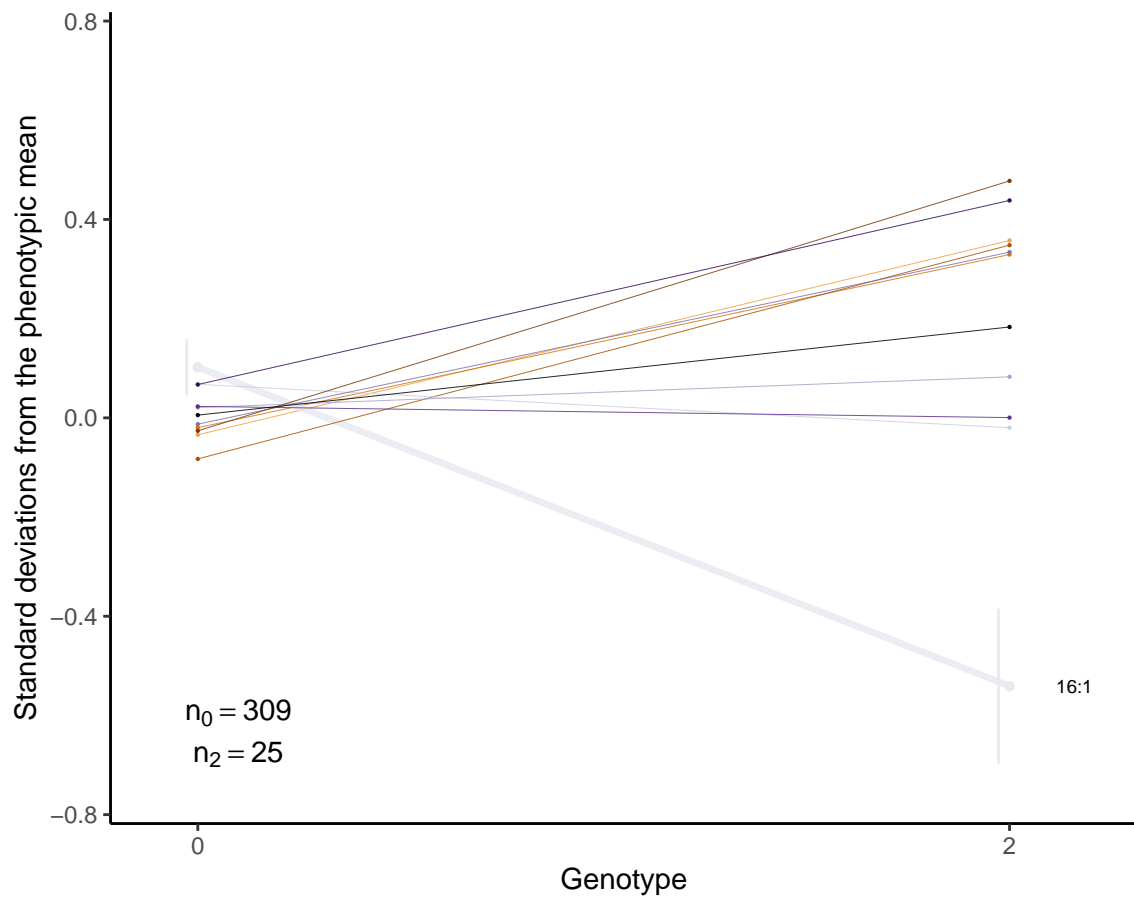

avgbs\_cluster\_28447.1.14 – MrgNA

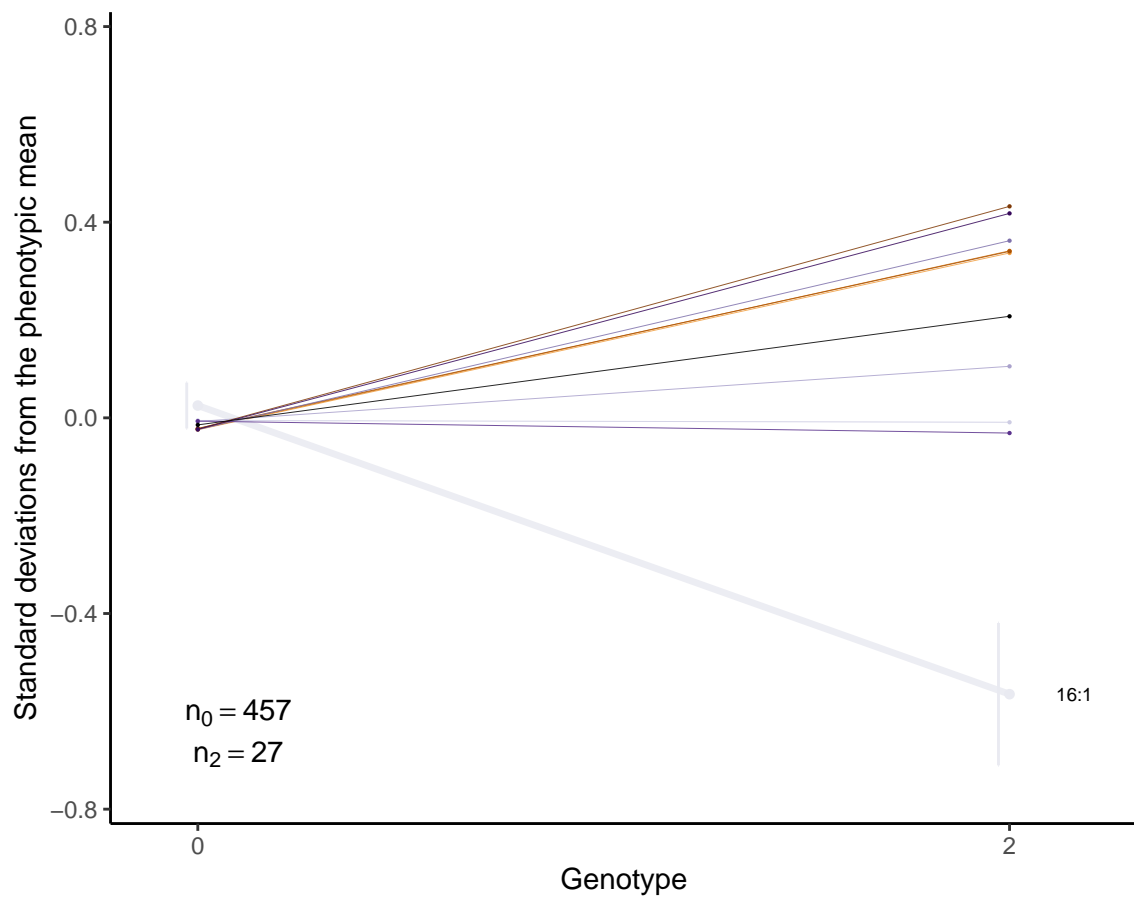

avgsbs\_cluster\_33683.1.36 – MrgNA

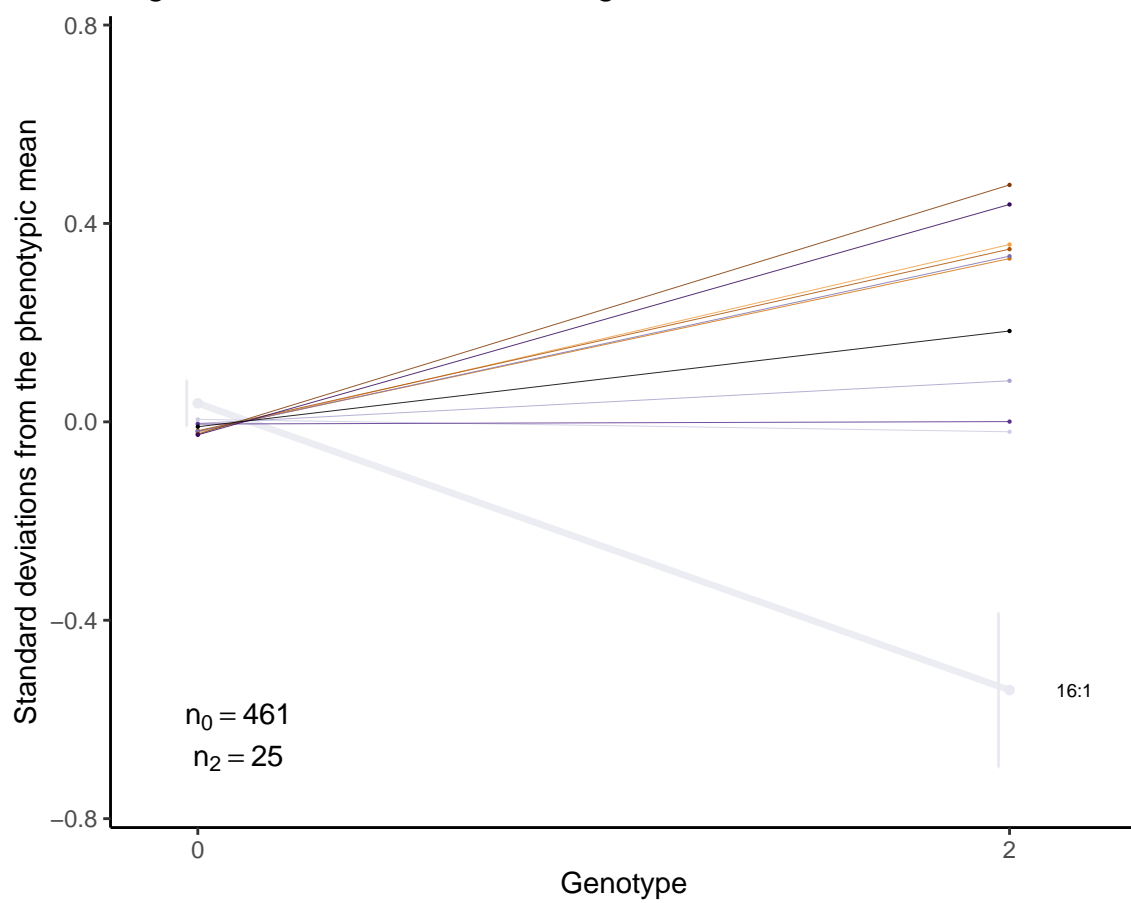

avgsbs\_65784.1.64 – MrgNA

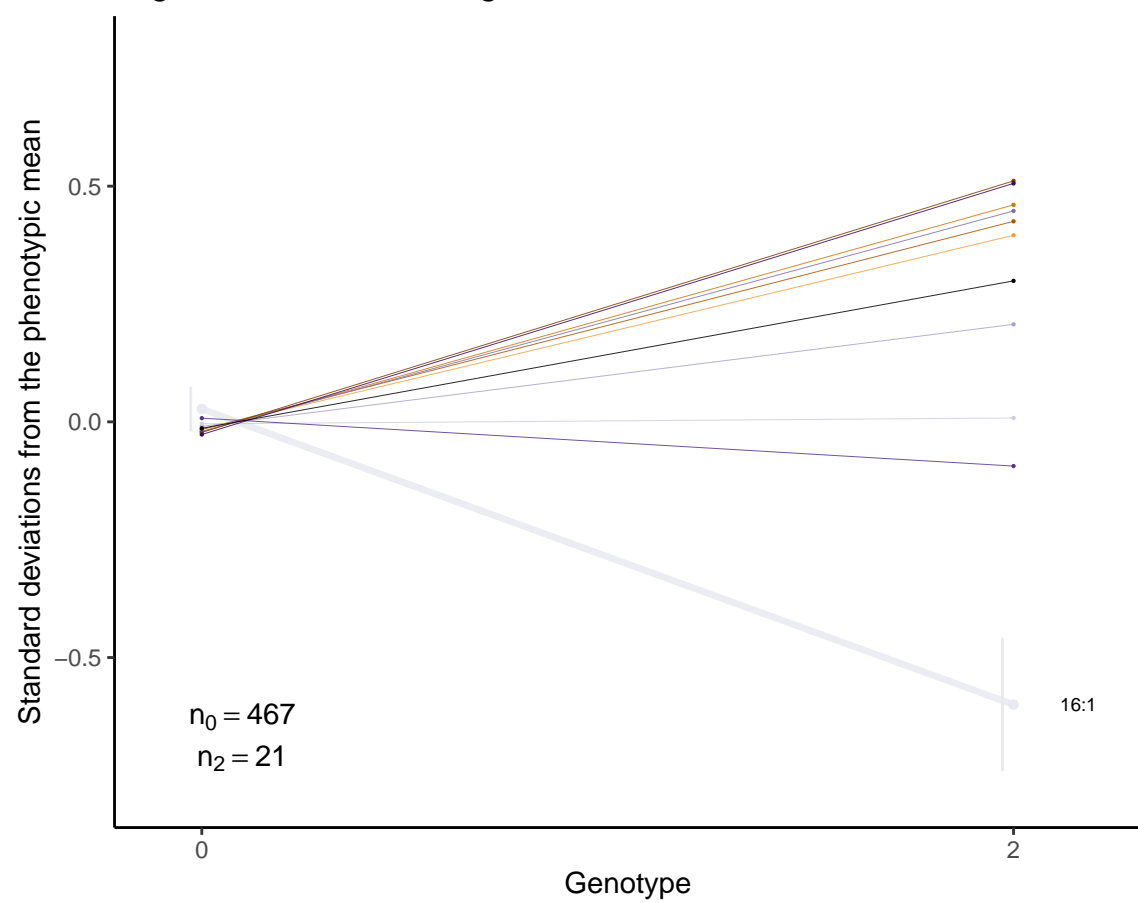

avgsbs2\_106098.1.18 – MrgNA

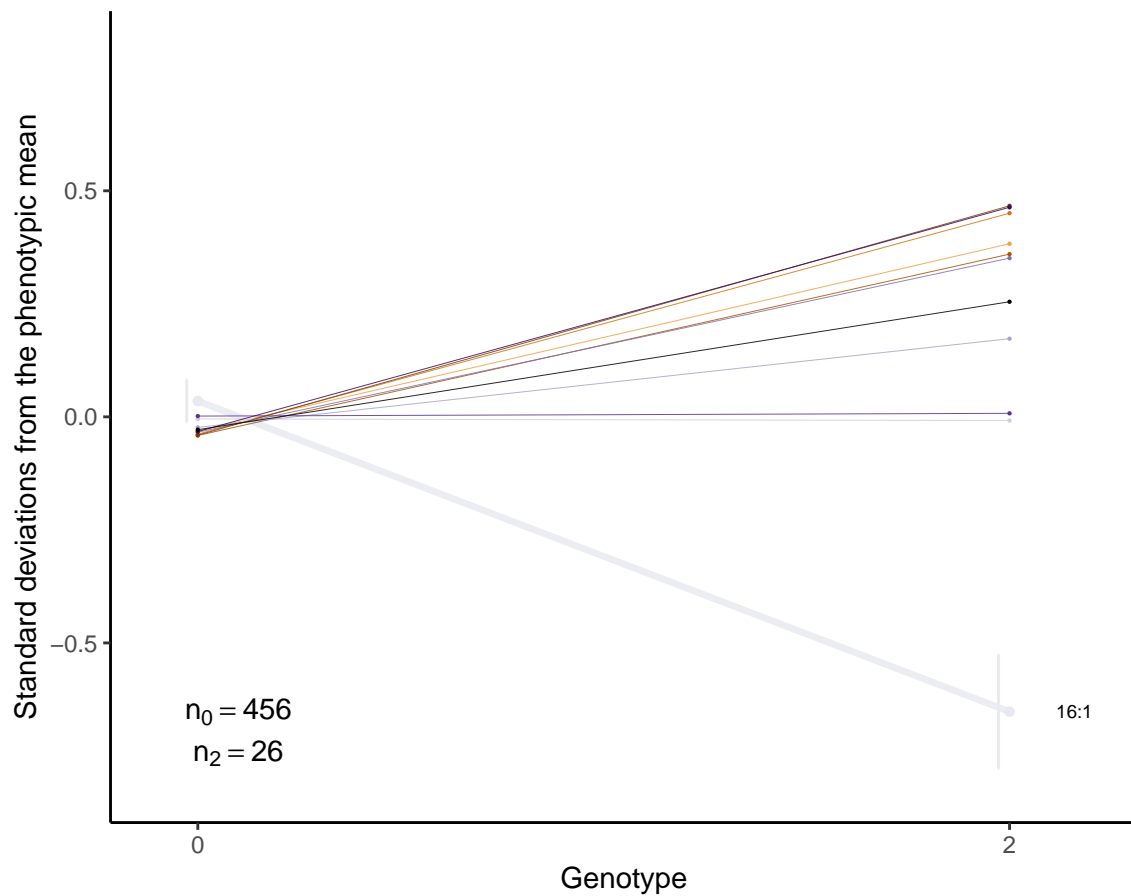

avgsbs\_cluster\_8834.2.56 – MrgNA

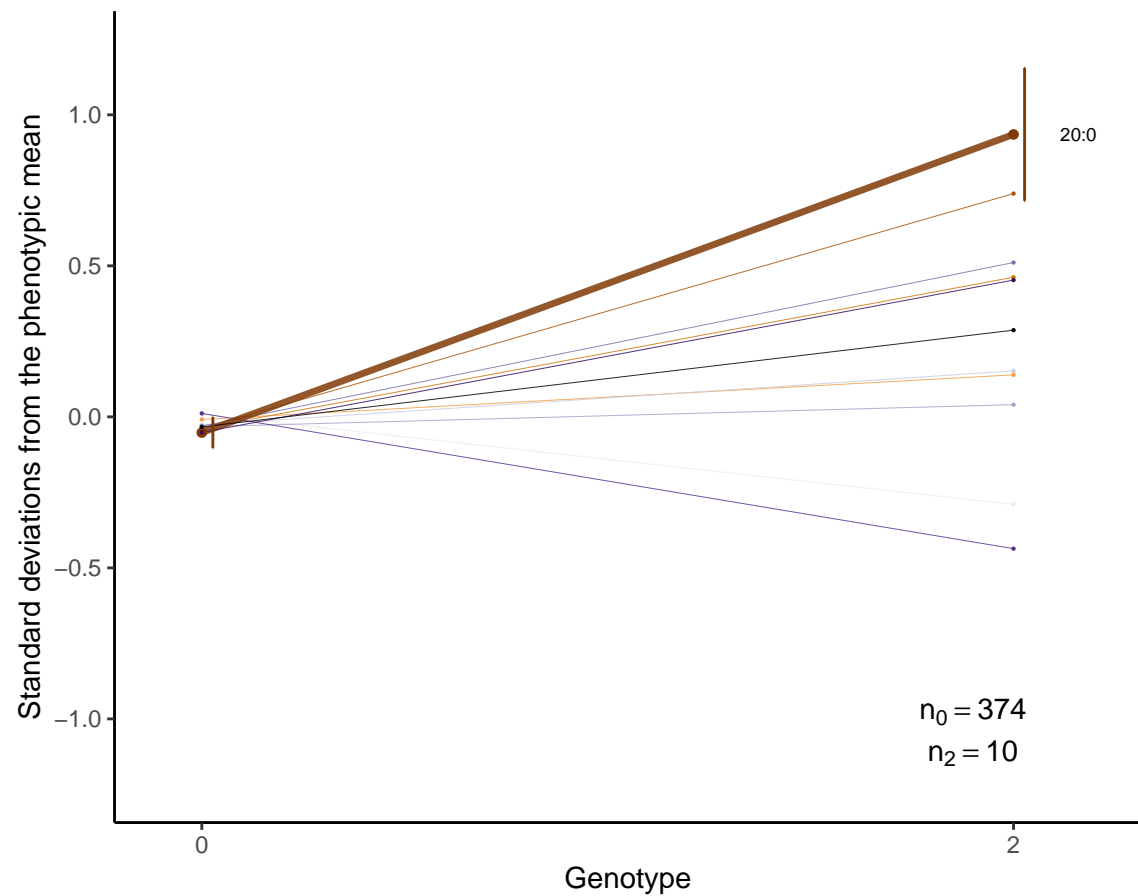

avgsbs2\_104840.1.26 – MrgNA

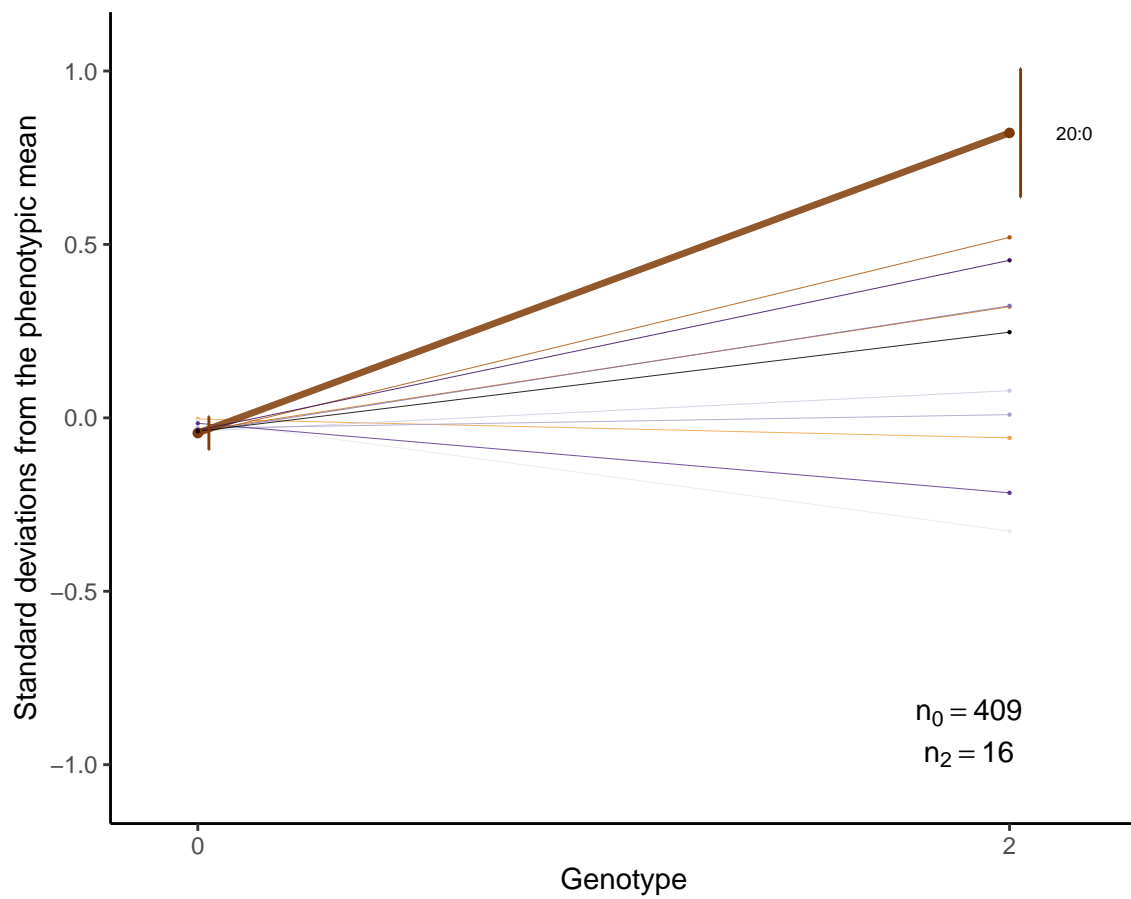

avgsbs\_548822.1.17 – MrgNA

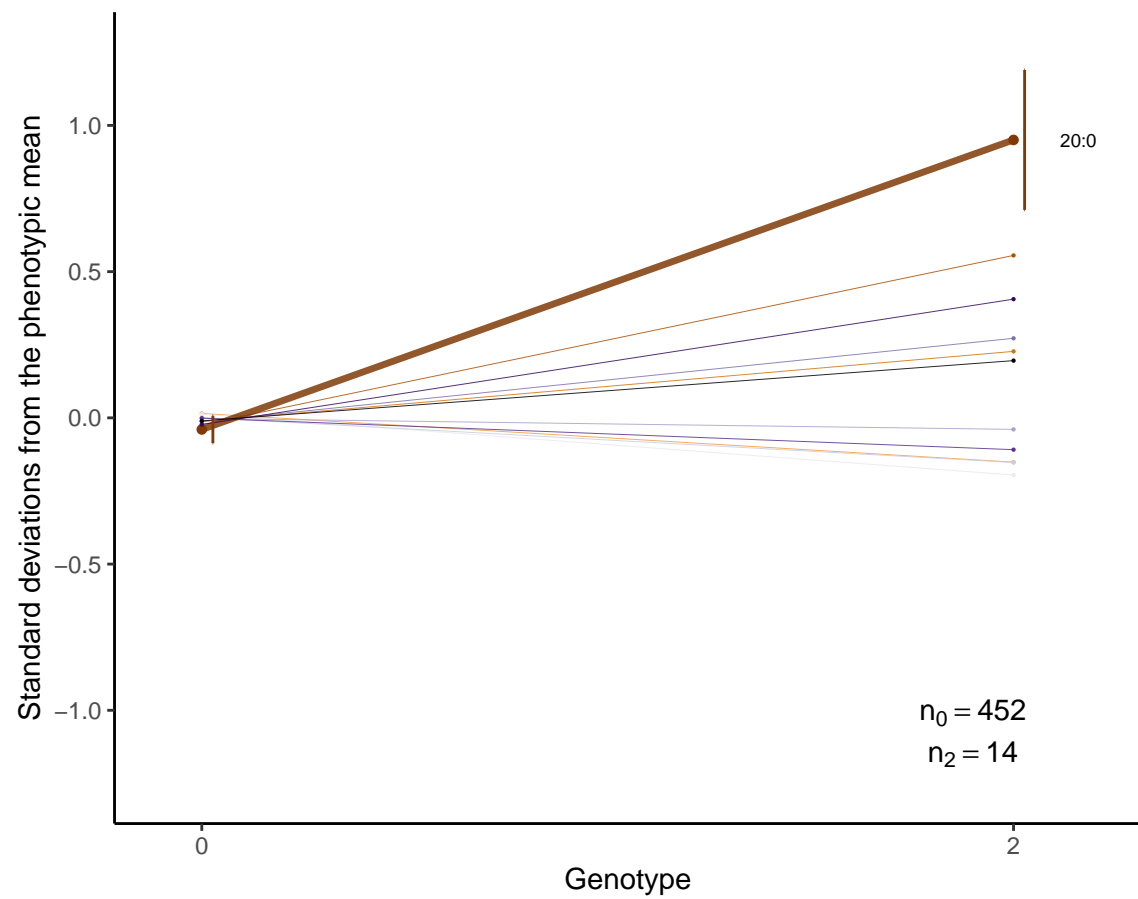

avgbs\_cluster\_66532.1.45 – MrgNA

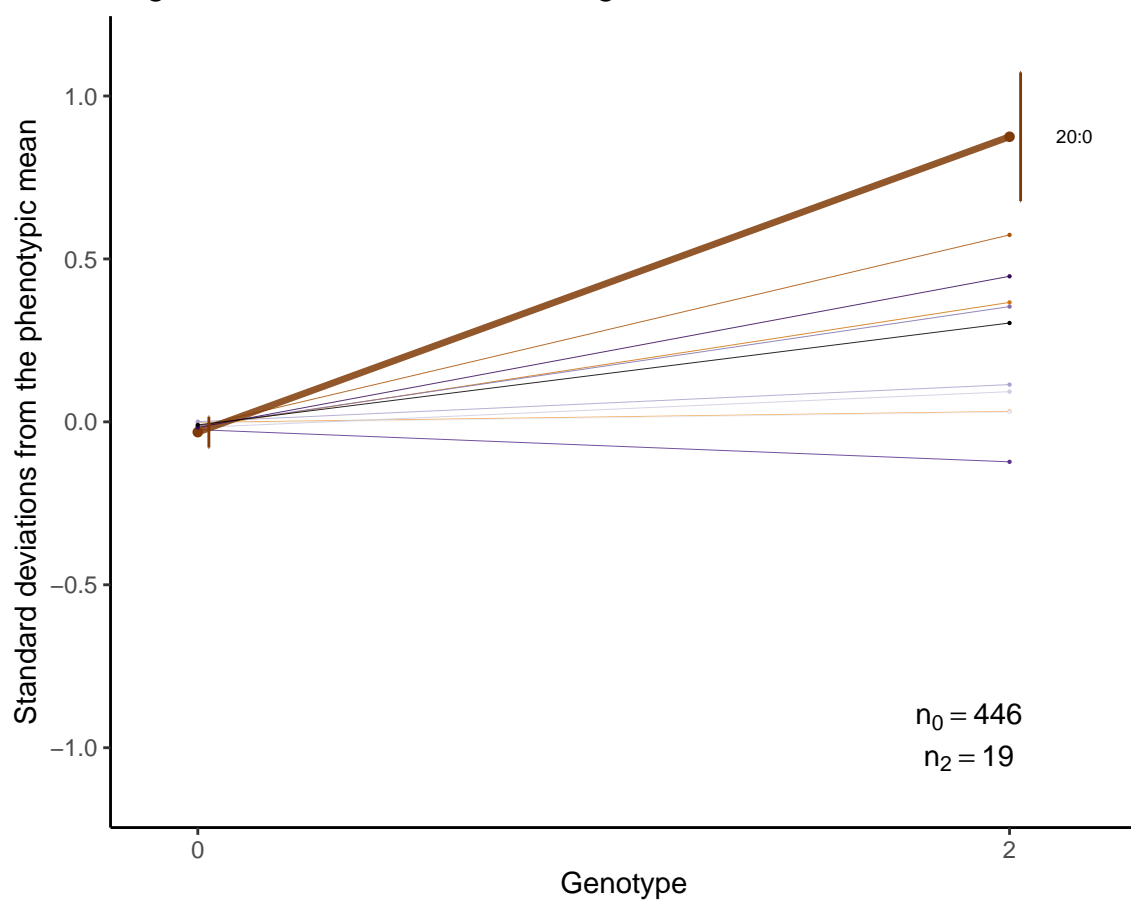

avgbs\_cluster\_36240.1.28 – MrgNA

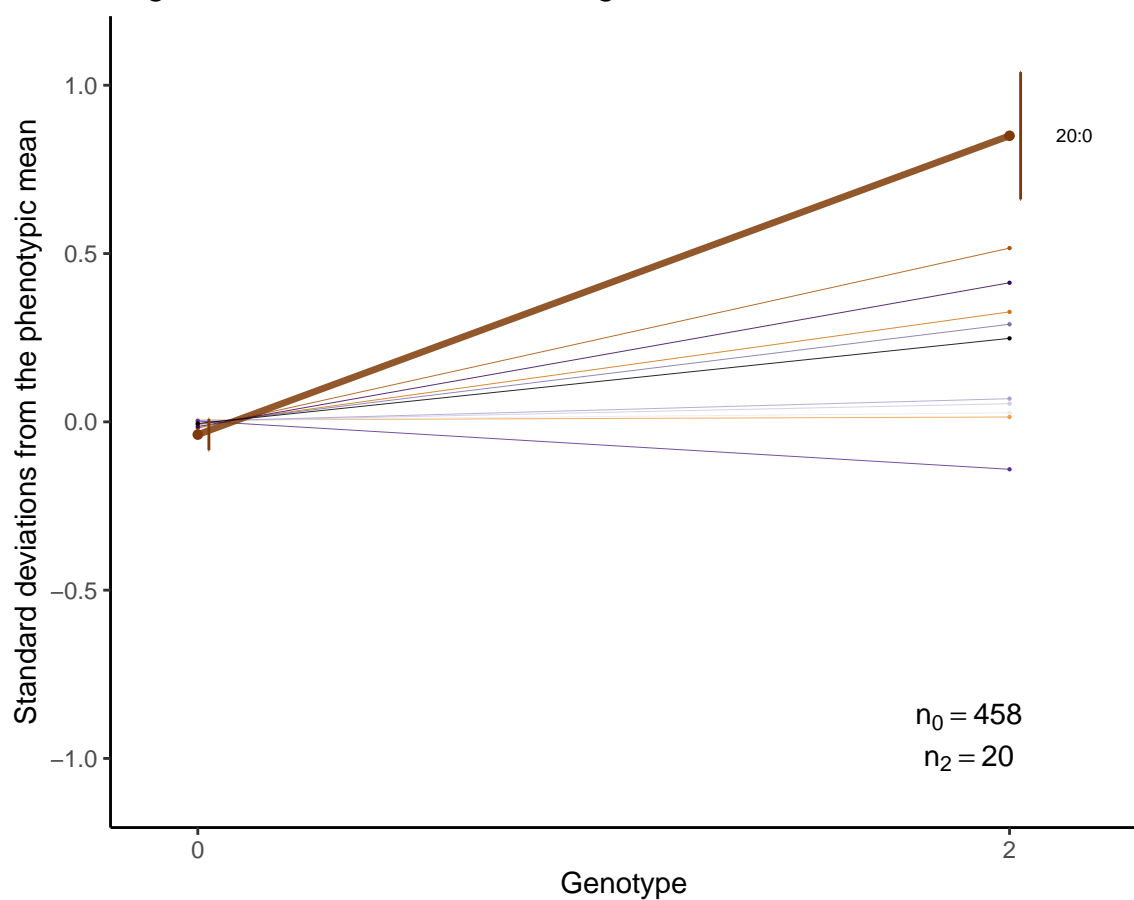

avgbs\_96603.1.24 – MrgNA

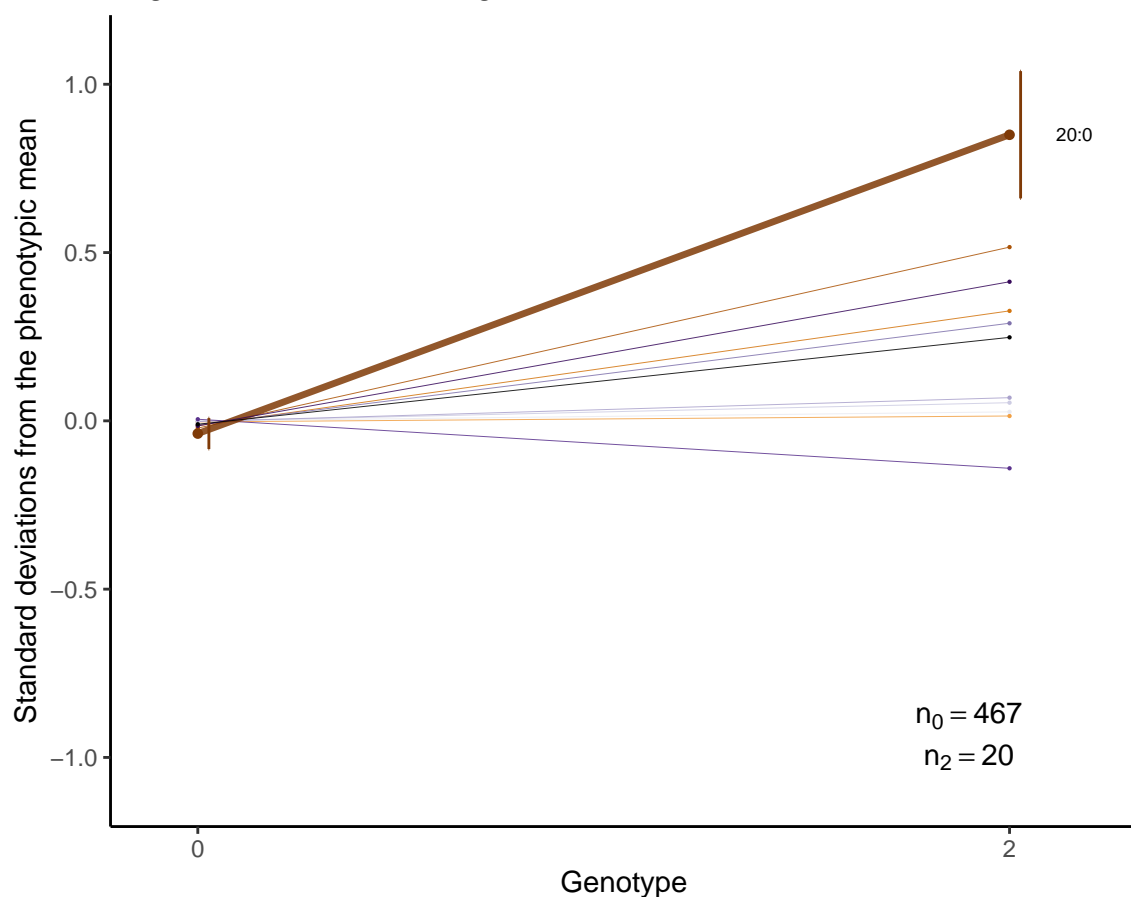

avgbs\_cluster\_22378.1.58 – MrgNA

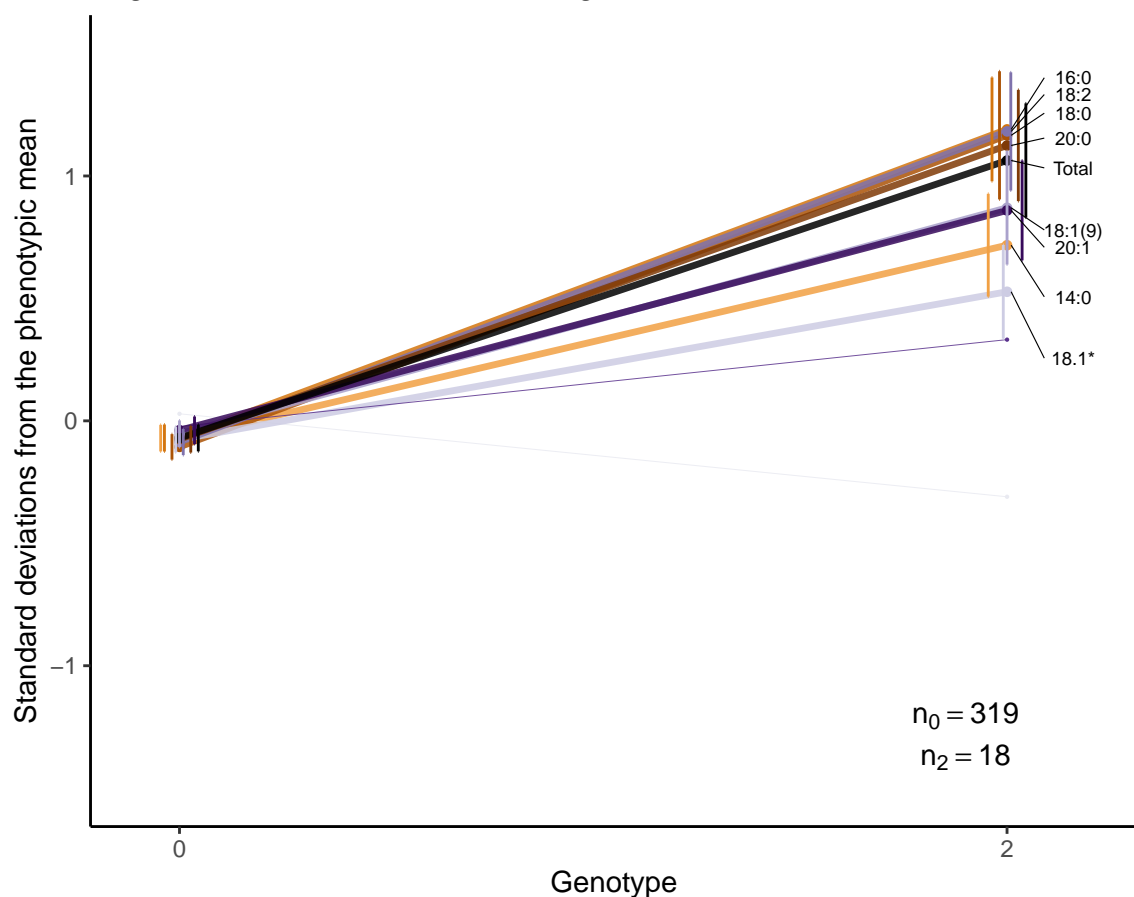

avgbs2\_103518.1.8 – Mrg03

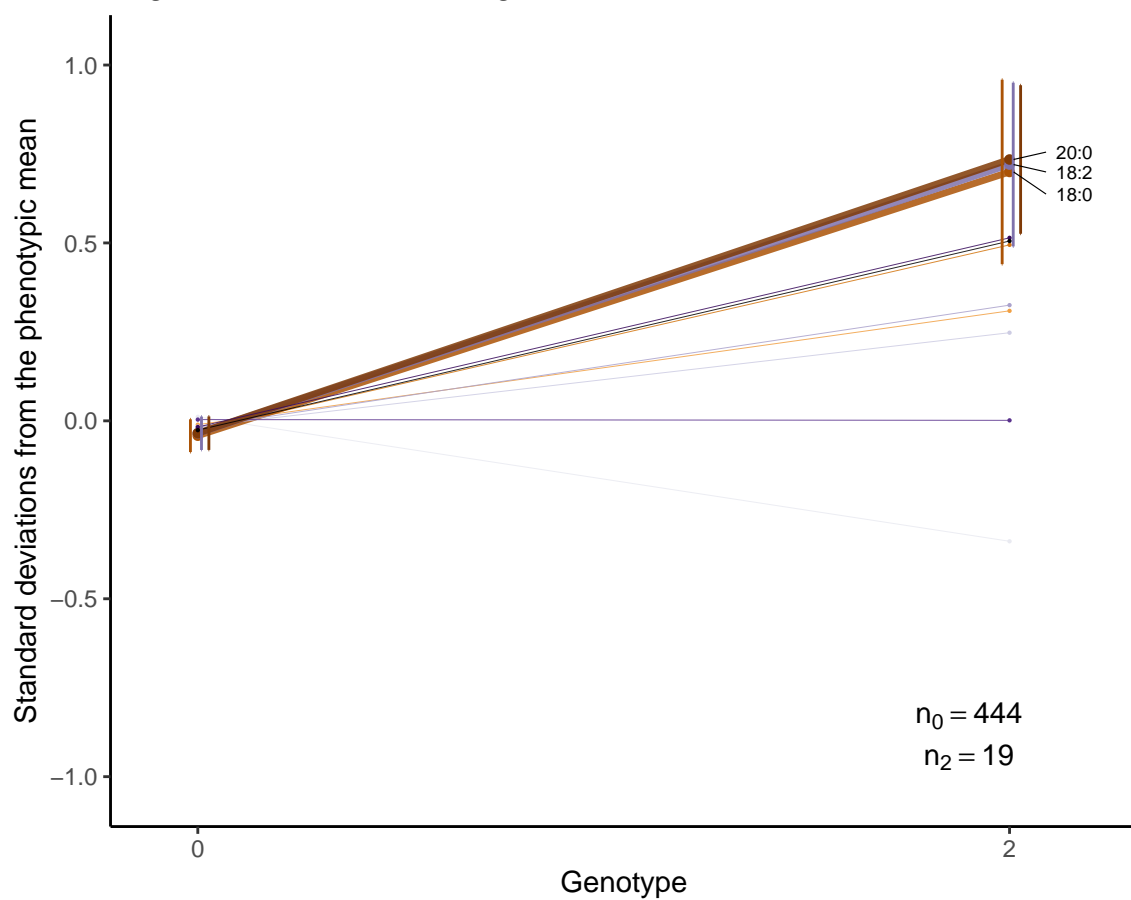

avgbs\_cluster\_7594.1.10 – MrgNA

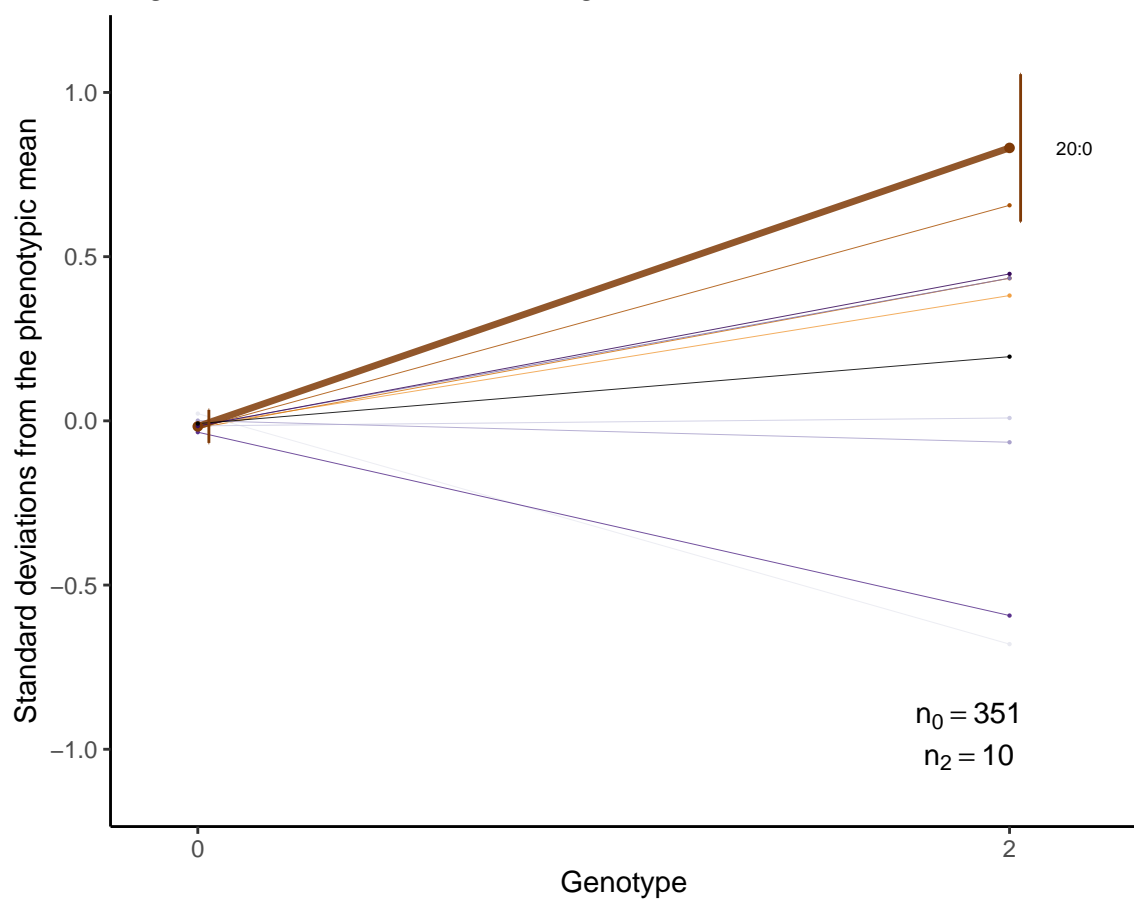

avgbs\_cluster\_14001.1.19 – MrgNA

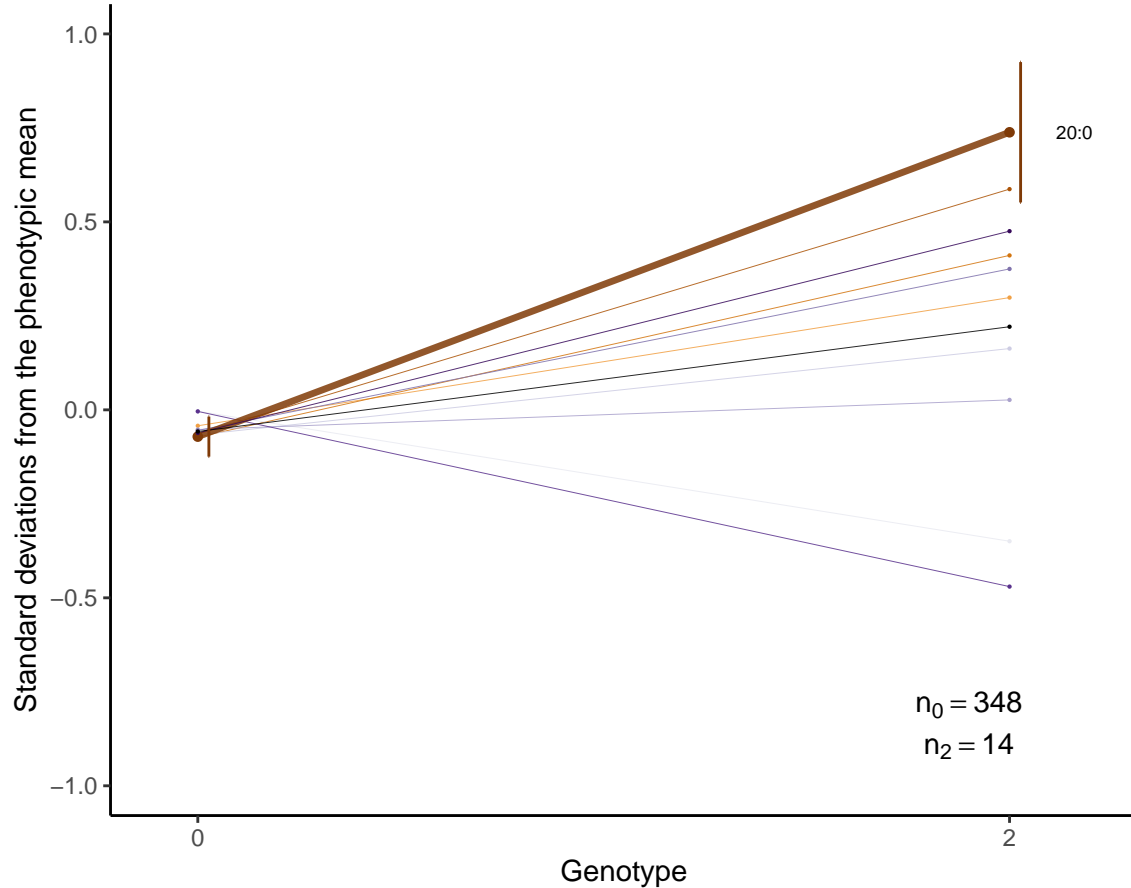

avgbs\_cluster\_33550.1.18 – MrgNA

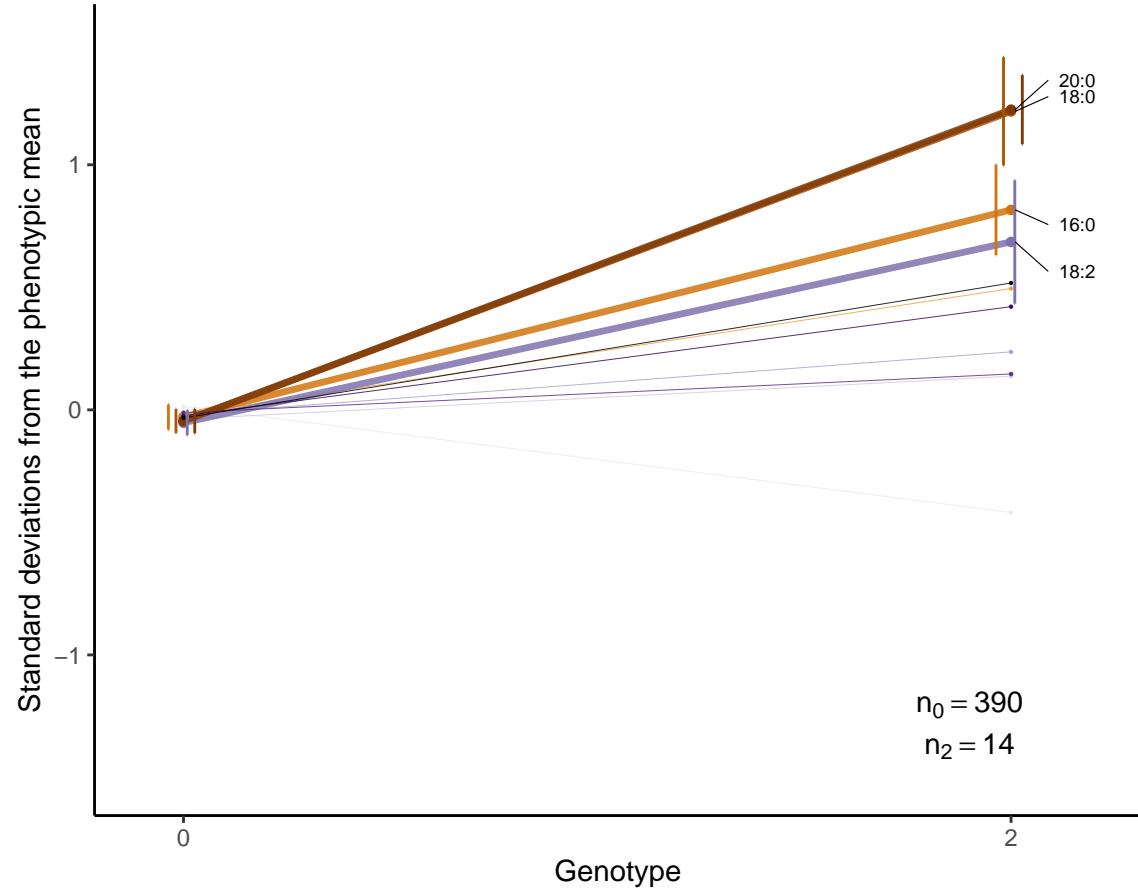

avgbs2\_3847.1.32 – MrgNA

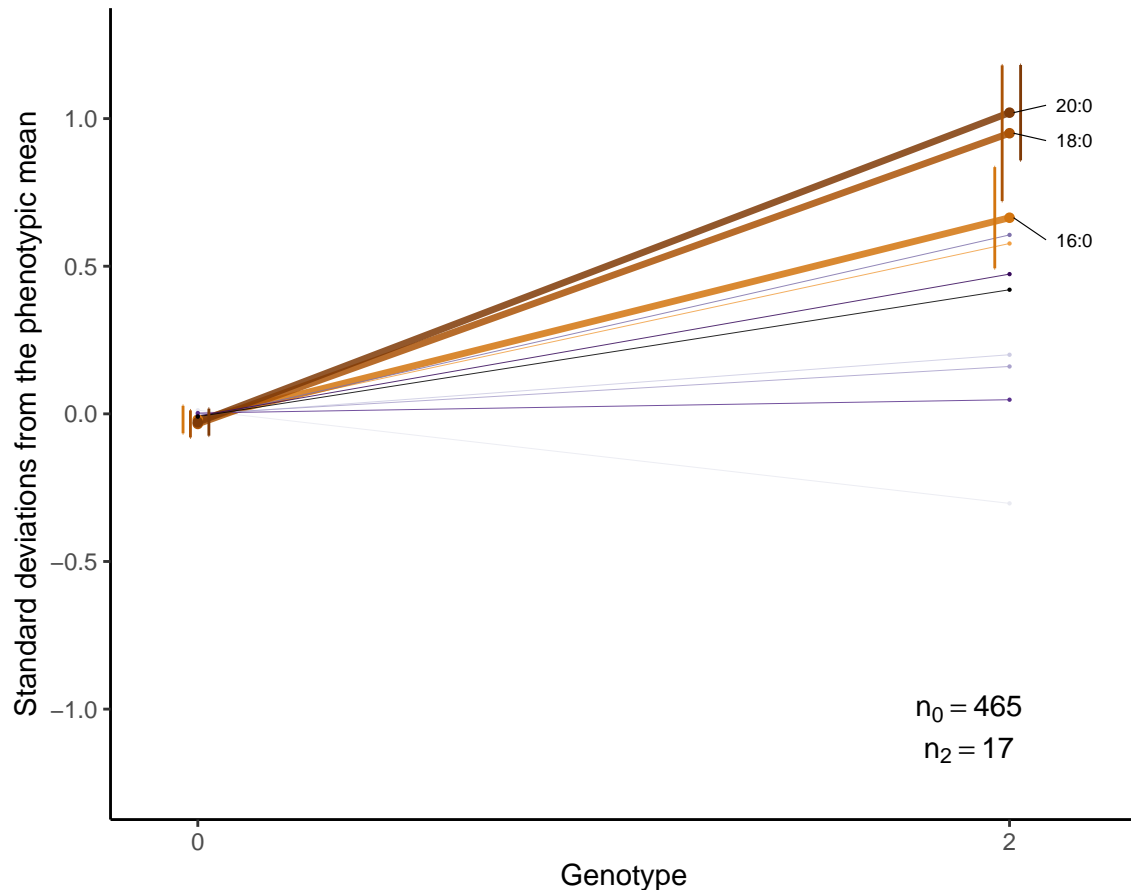

avgbs2\_89821.1.27 – MrgNA

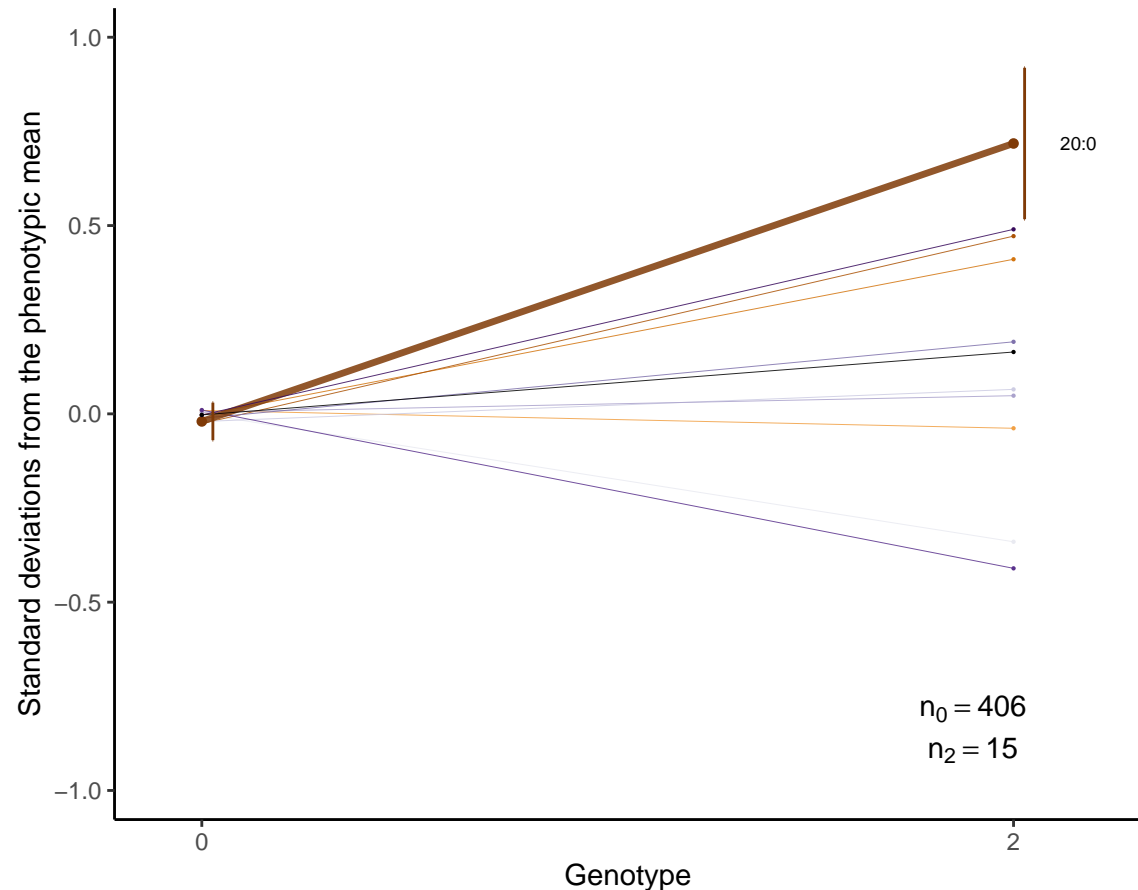

avgbs\_122063.1.23 – MrgNA

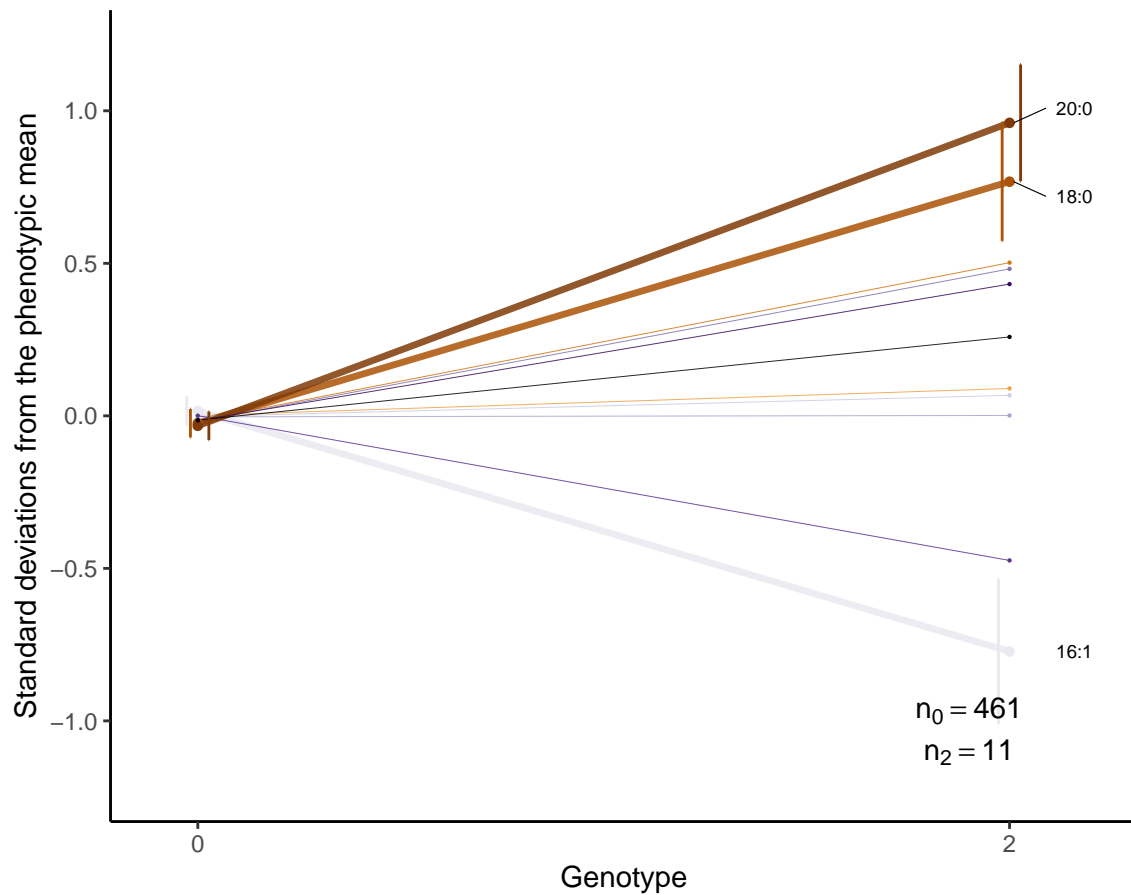

avgbs\_cluster\_18968.1.7 – MrgNA

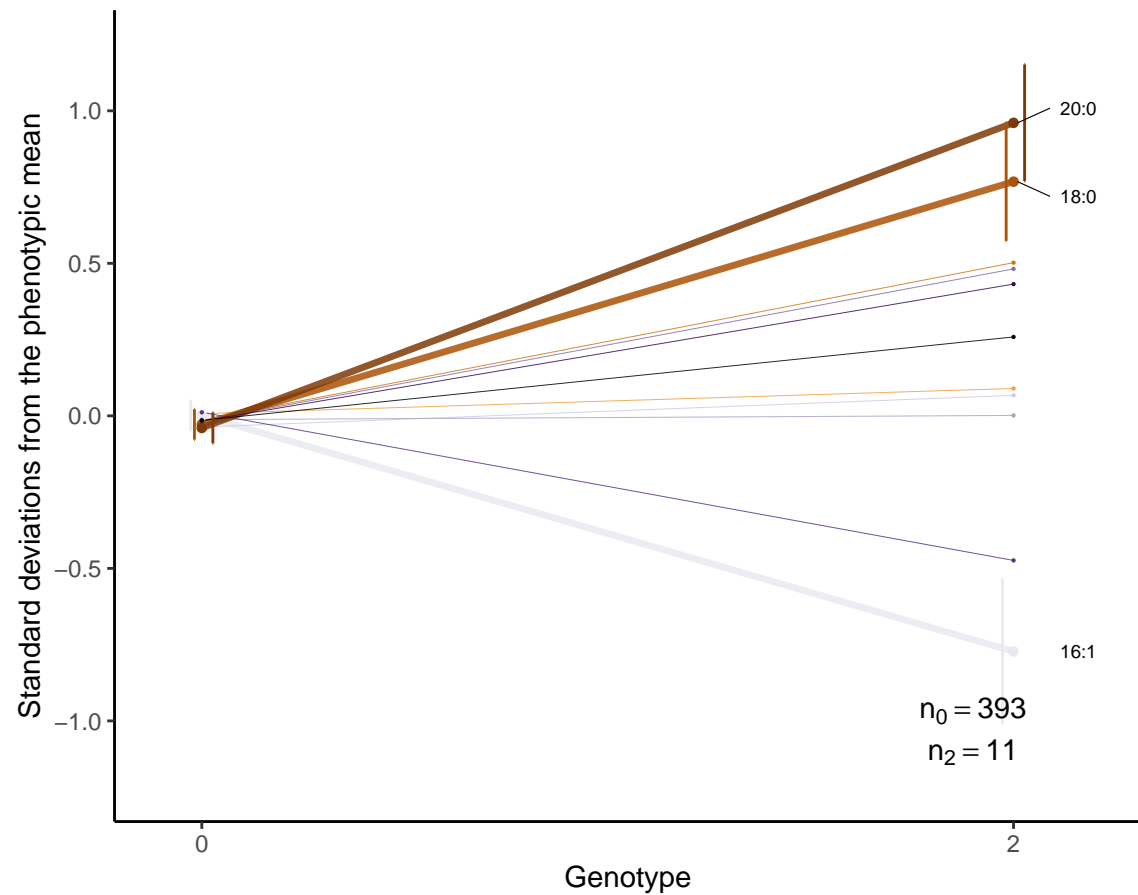

avgbs\_431203.1.32 – MrgNA

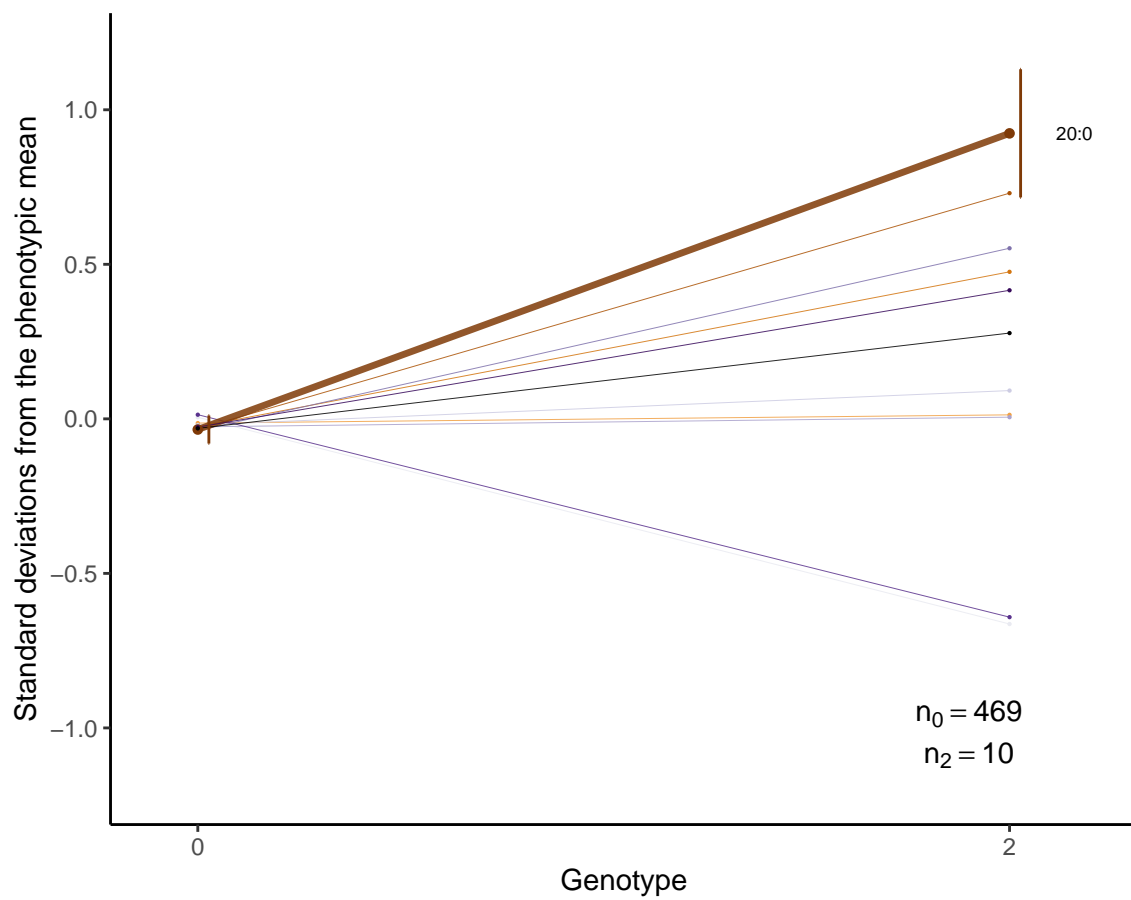

avgbs\_11169.1.43 – Mrg05

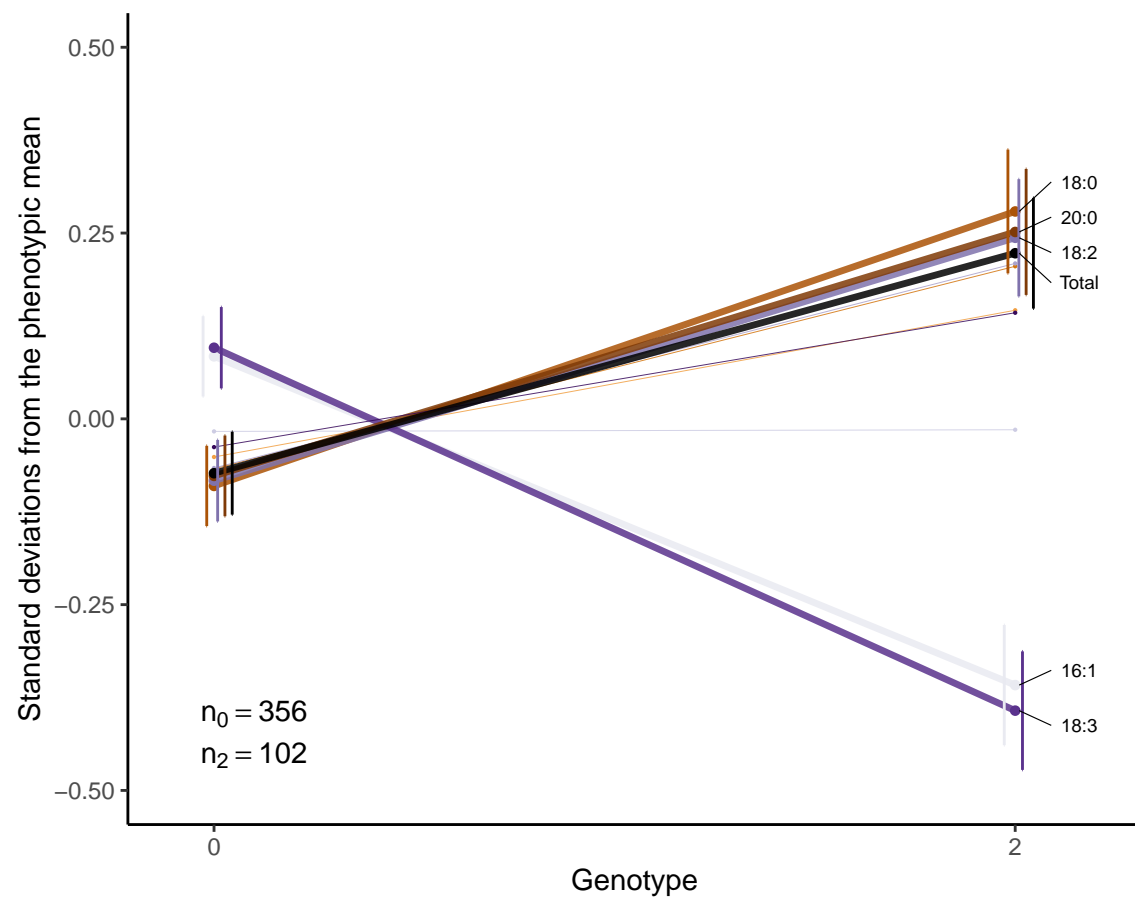

avgbs\_cluster\_20670.1.12 – Mrg05

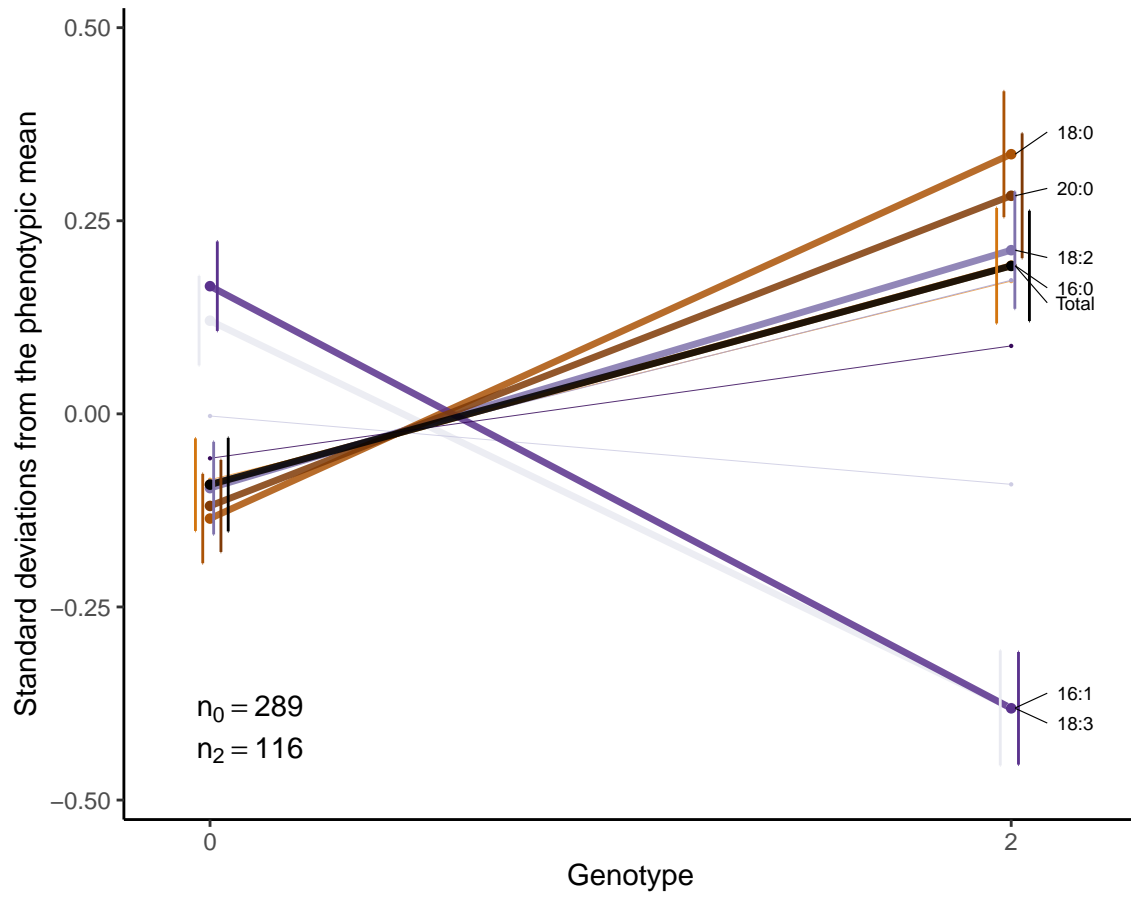

avgbs\_cluster\_40722.1.34 – Mrg05

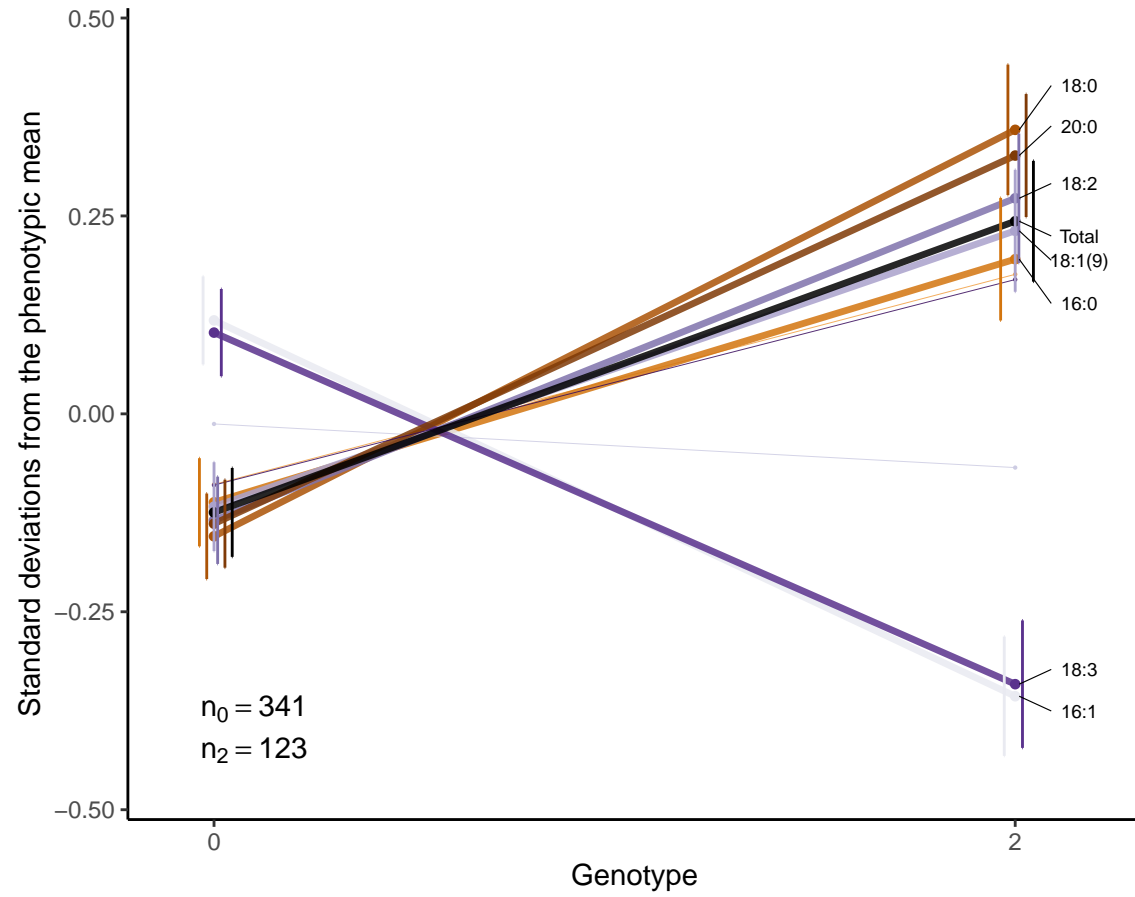

avgbs2\_28236.1.32 – Mrg05

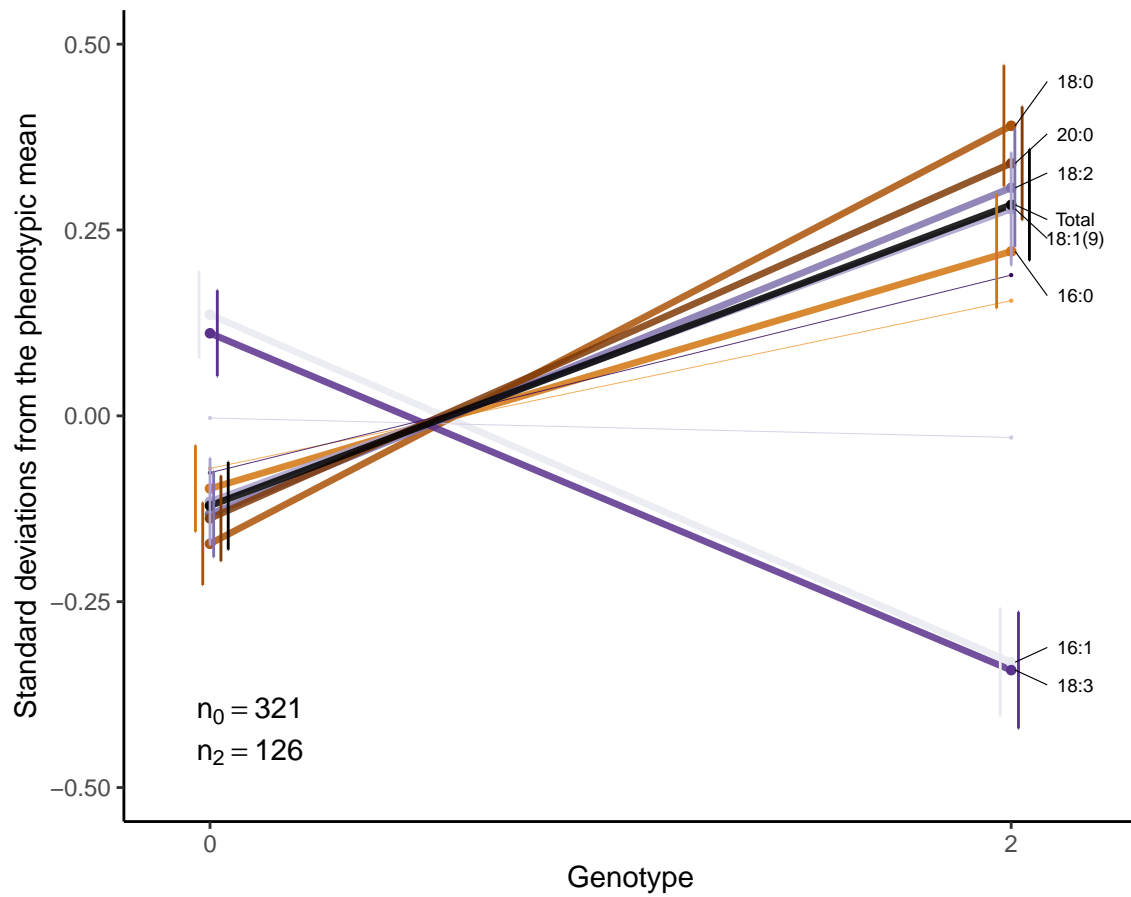

avgbs\_cluster\_32145.1.20 – Mrg05

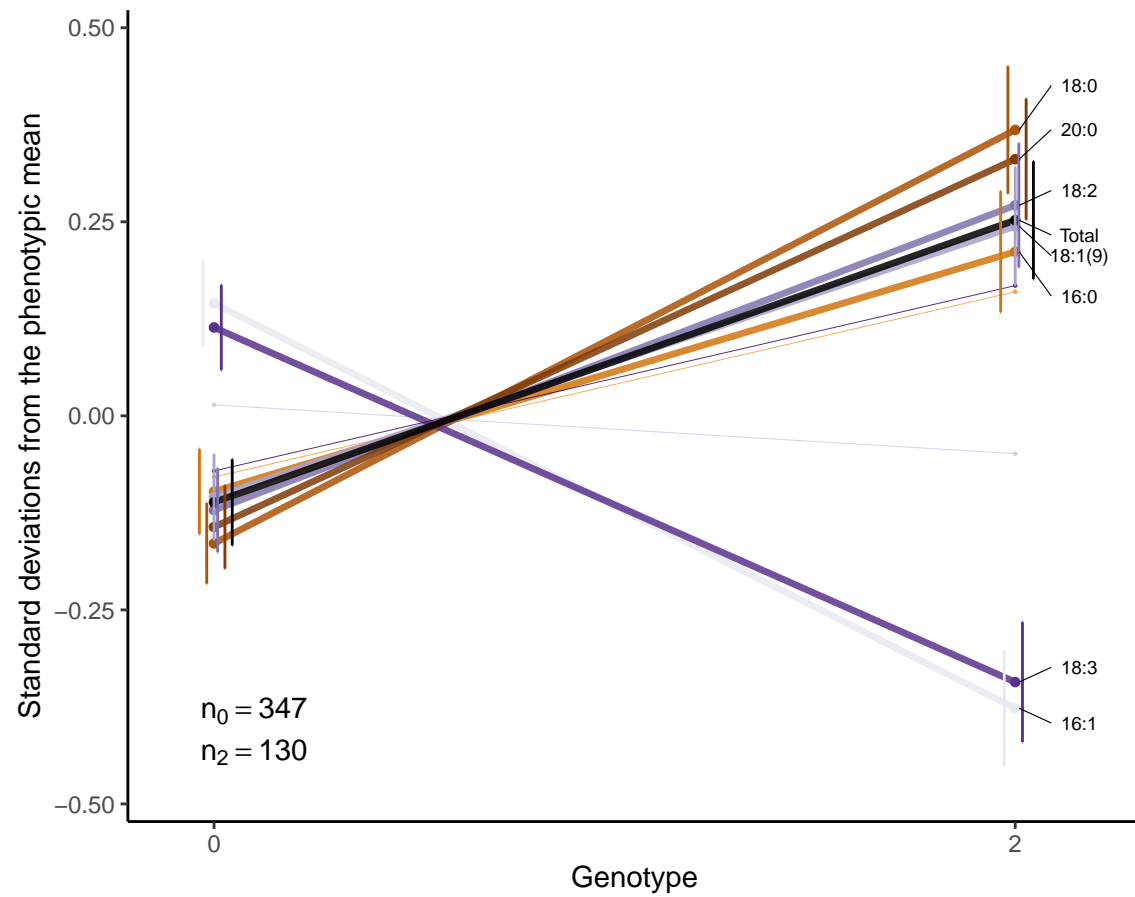

avgbs\_205004.1.64 – Mrg05

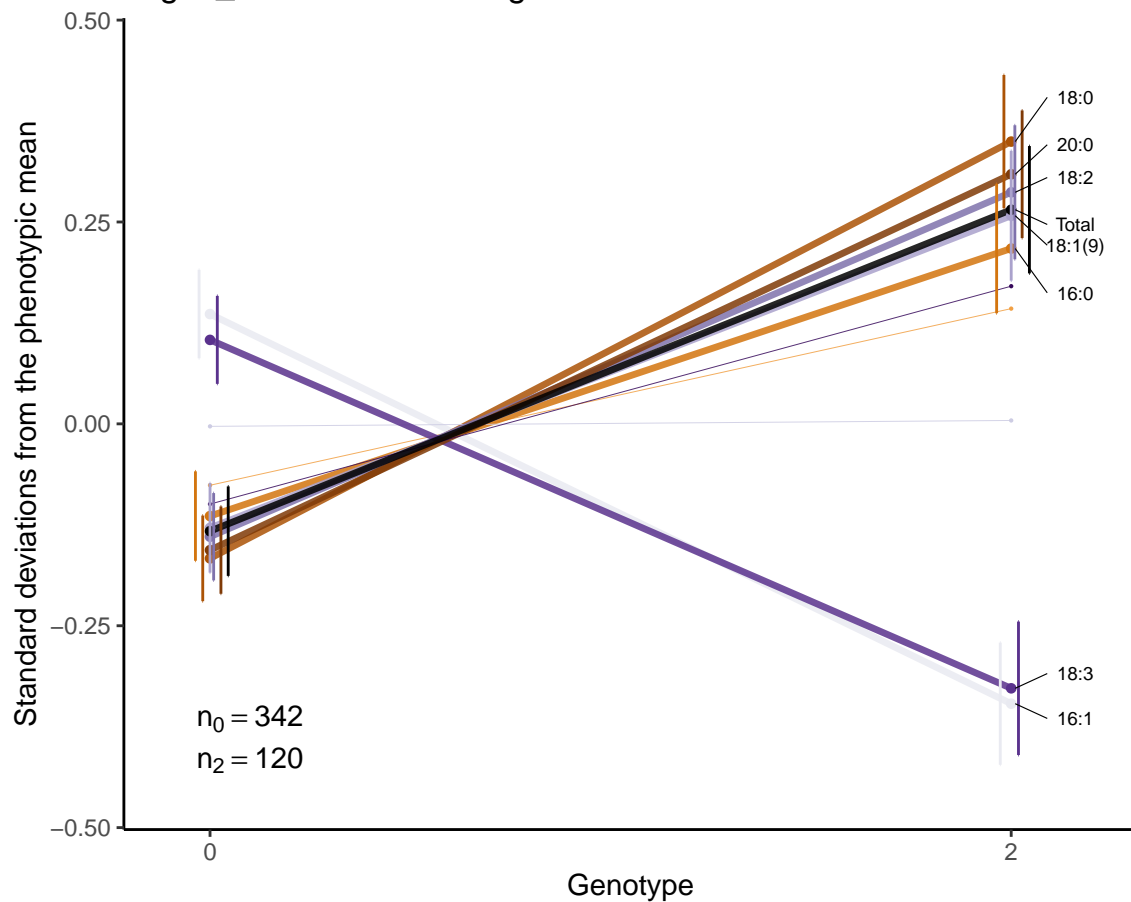

avgbs\_cluster\_11363.1.47 – Mrg05

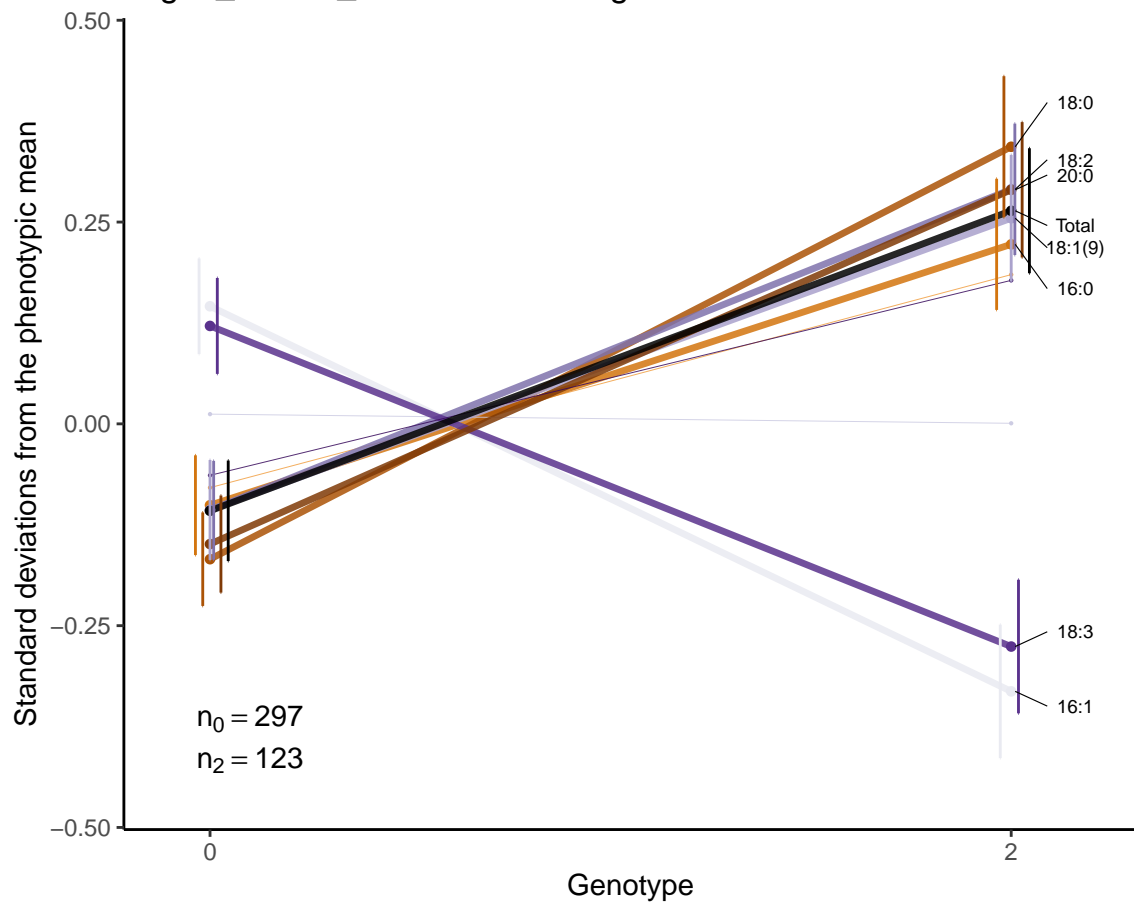

avgbs\_cluster\_7619.1.13 – Mrg05

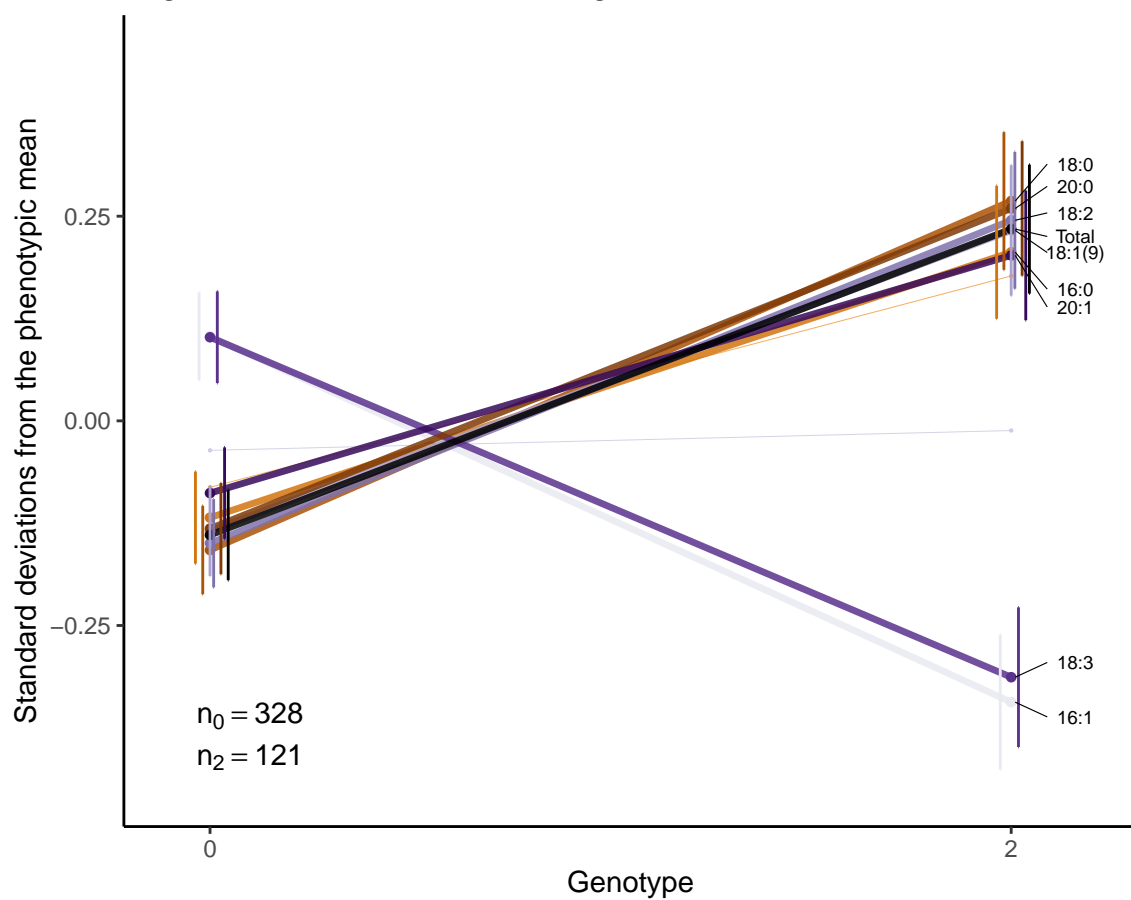

avgbs2\_128489.1.54 – Mrg05

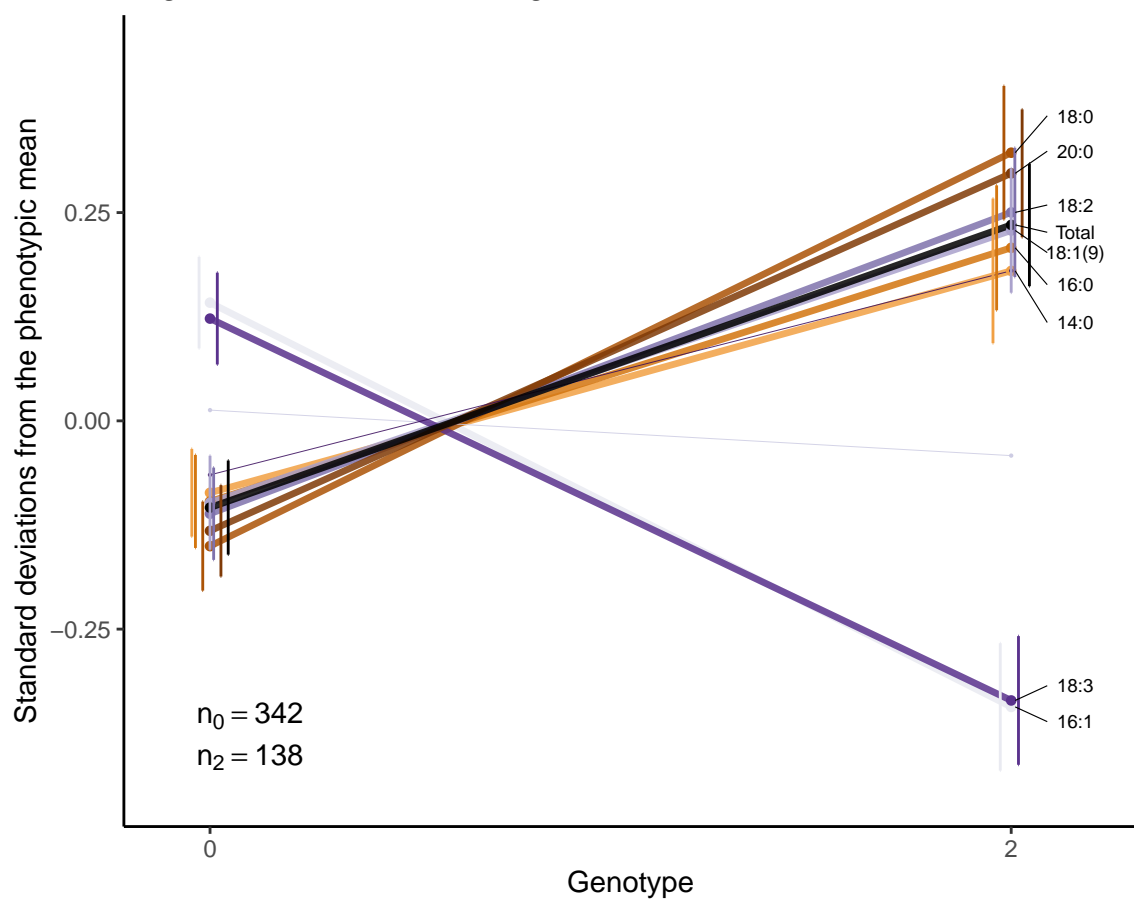

avgbs2\_199832.1.61 – Mrg05

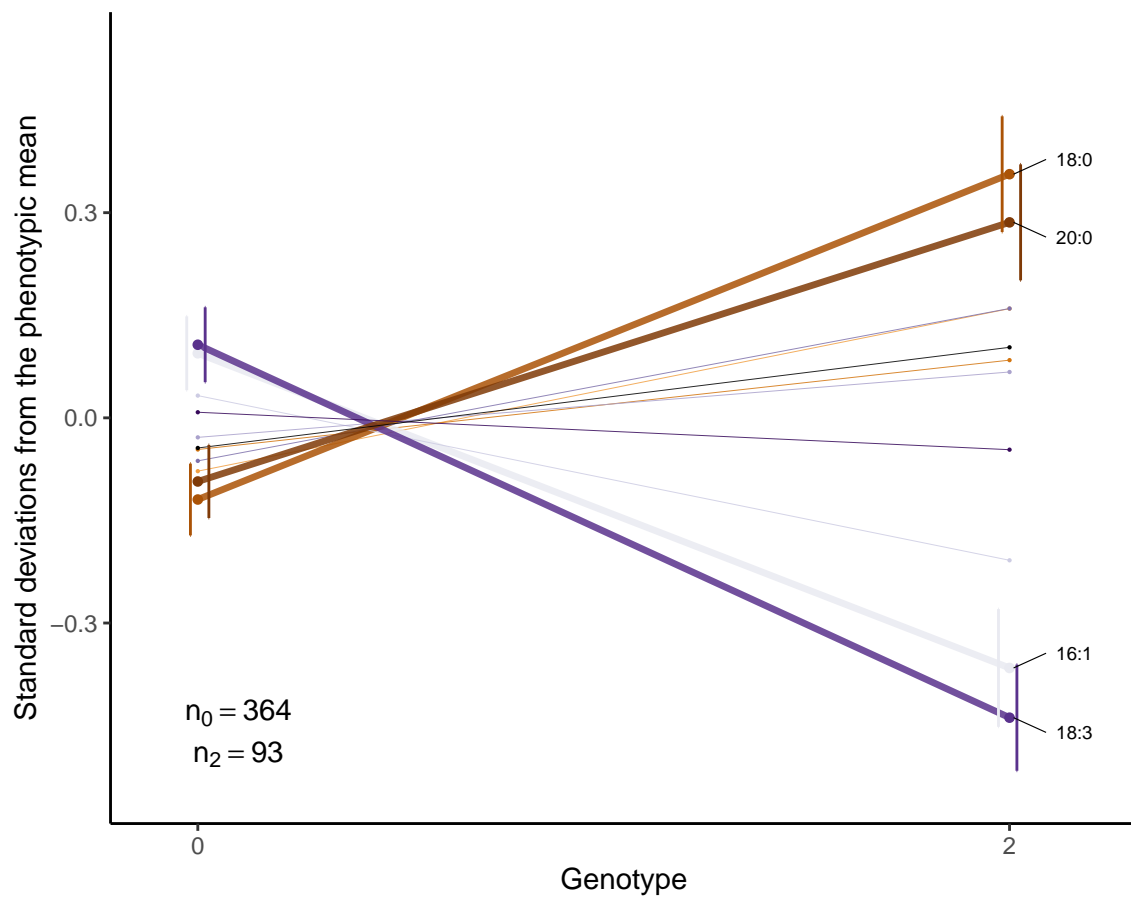

avgbs\_cluster\_7631.1.48 – MrgNA

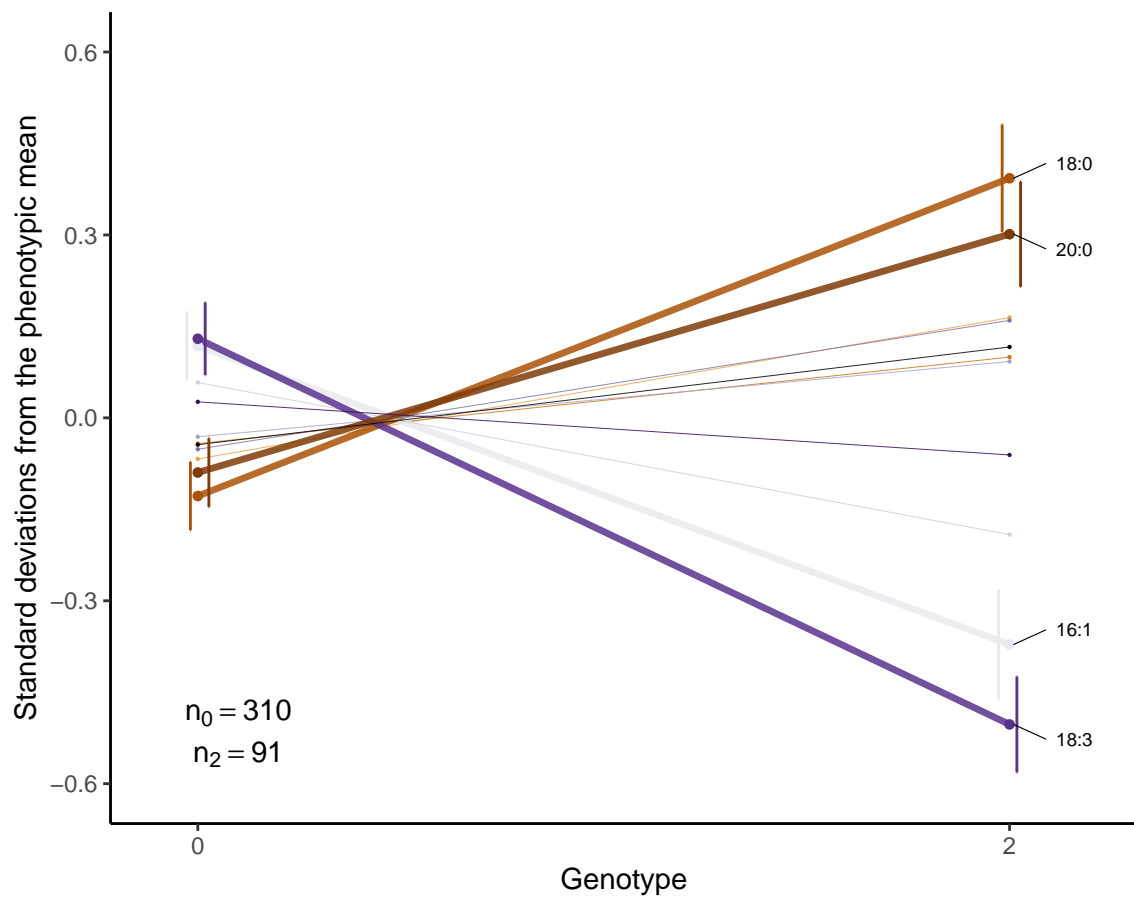



avgbs2\_198658.1.19 – MrgNA

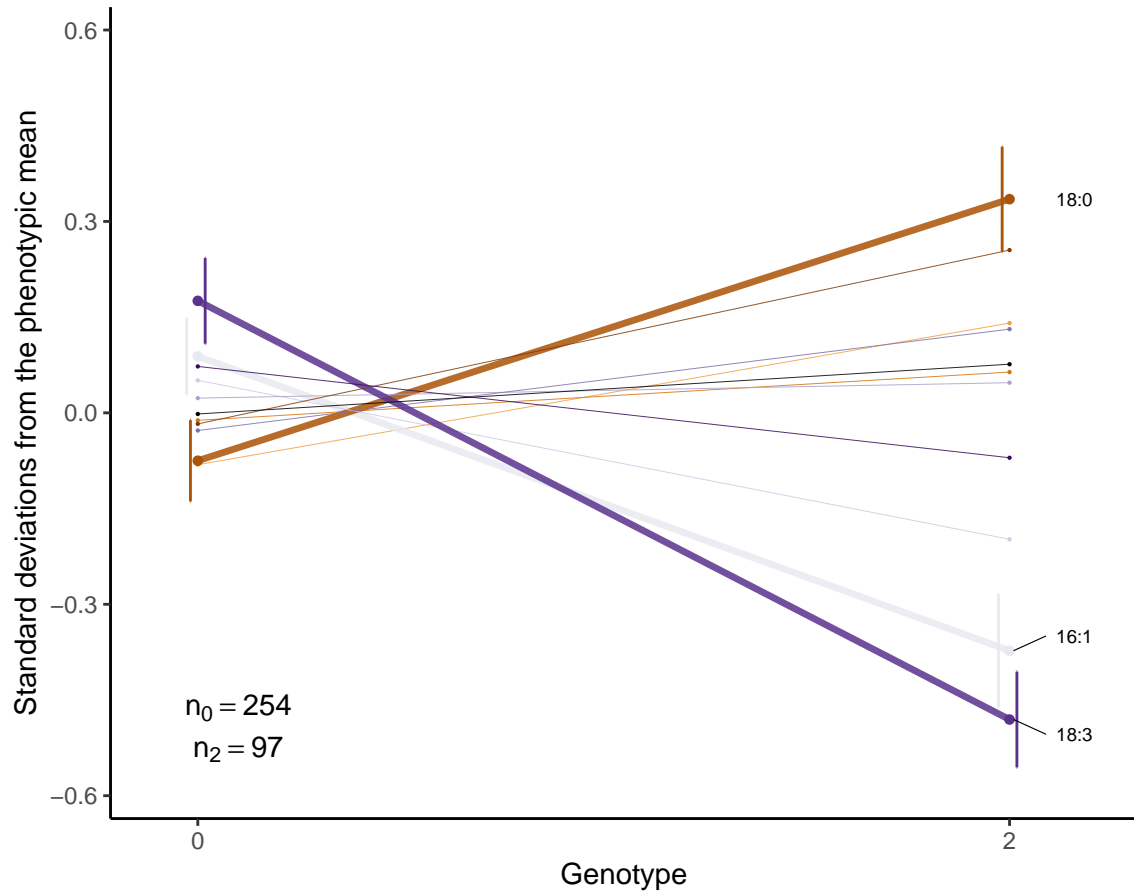

avgbs\_cluster\_36432.1.56 – Mrg05

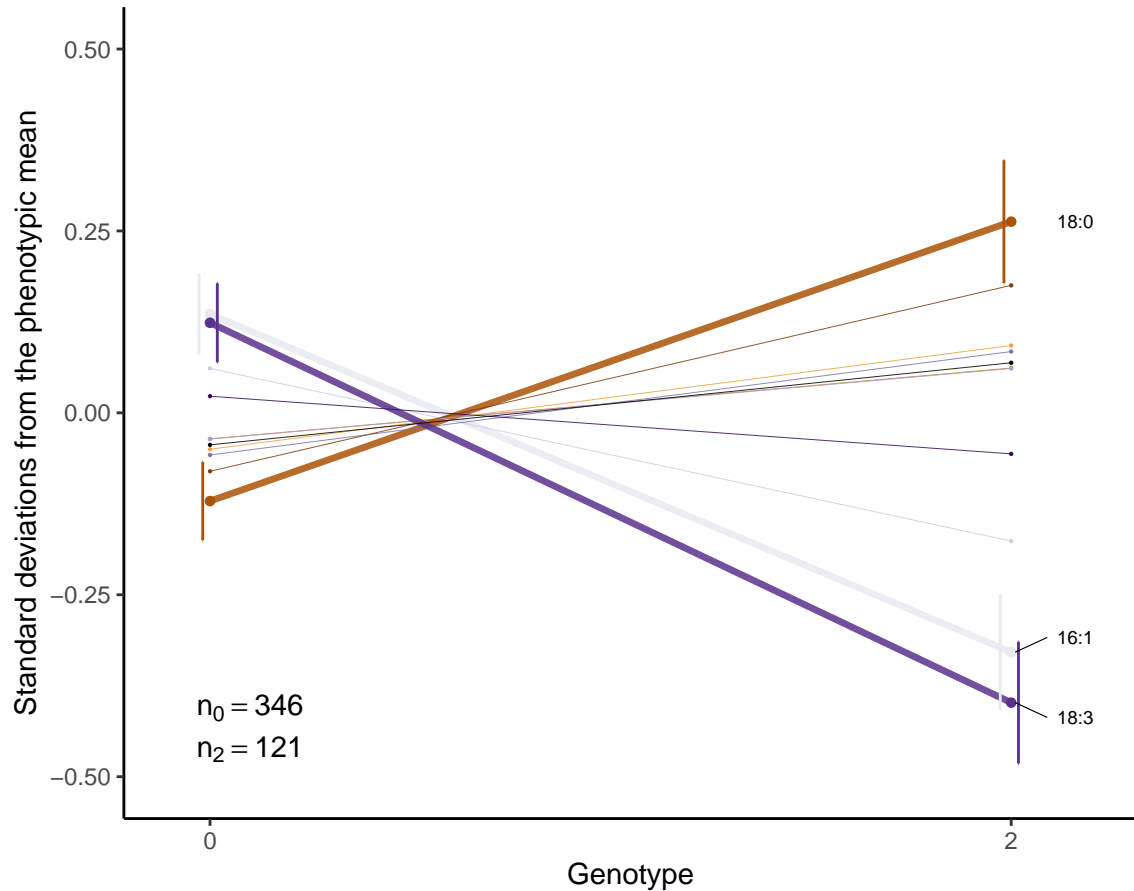

avgbs2\_173244.1.54 – Mrg05

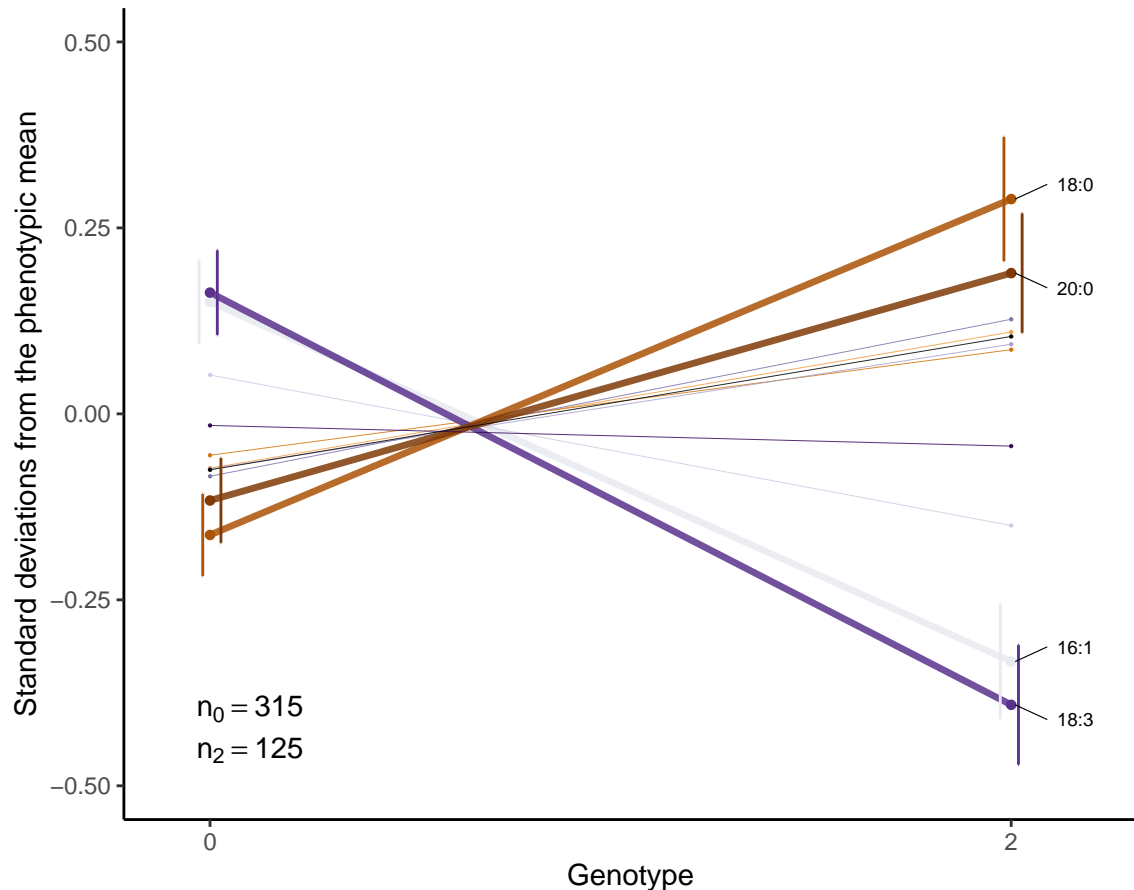

avgbs\_52110.1.43 – Mrg02

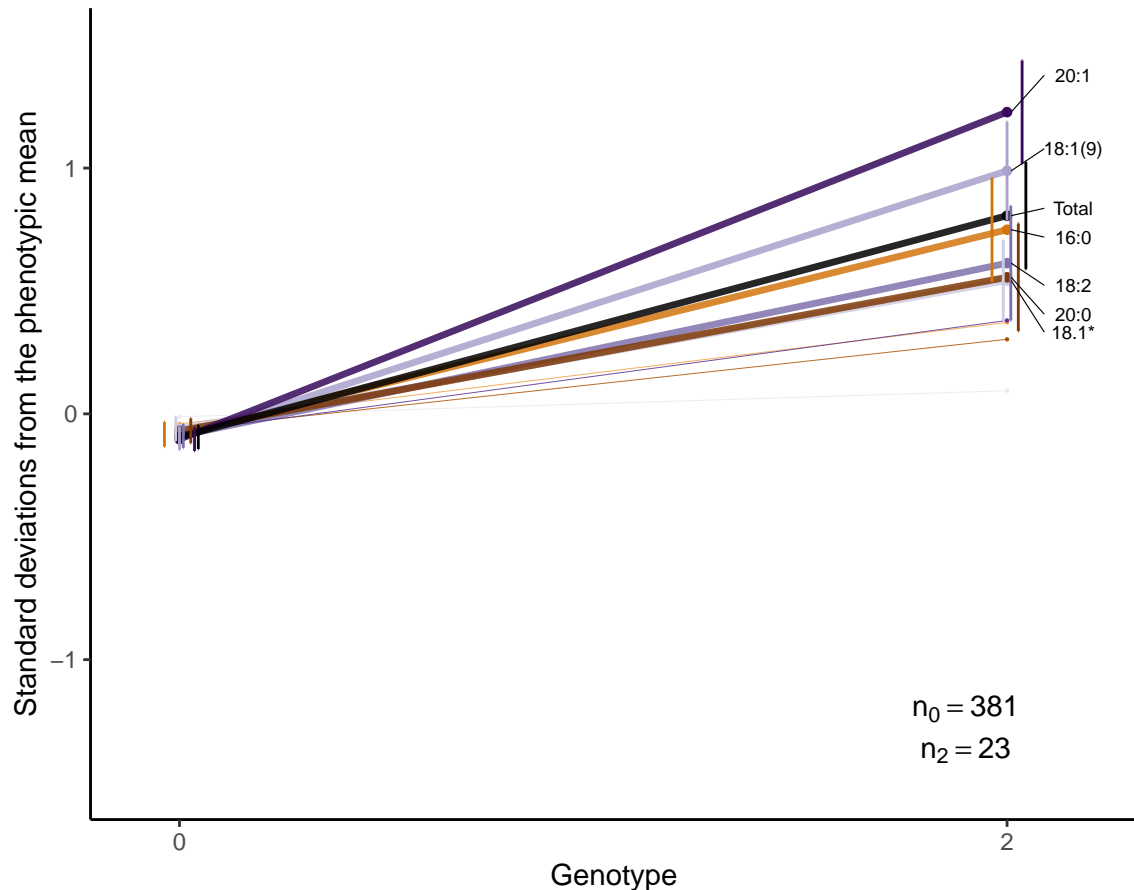

avgbs\_cluster\_33641.1.37 – Mrg02

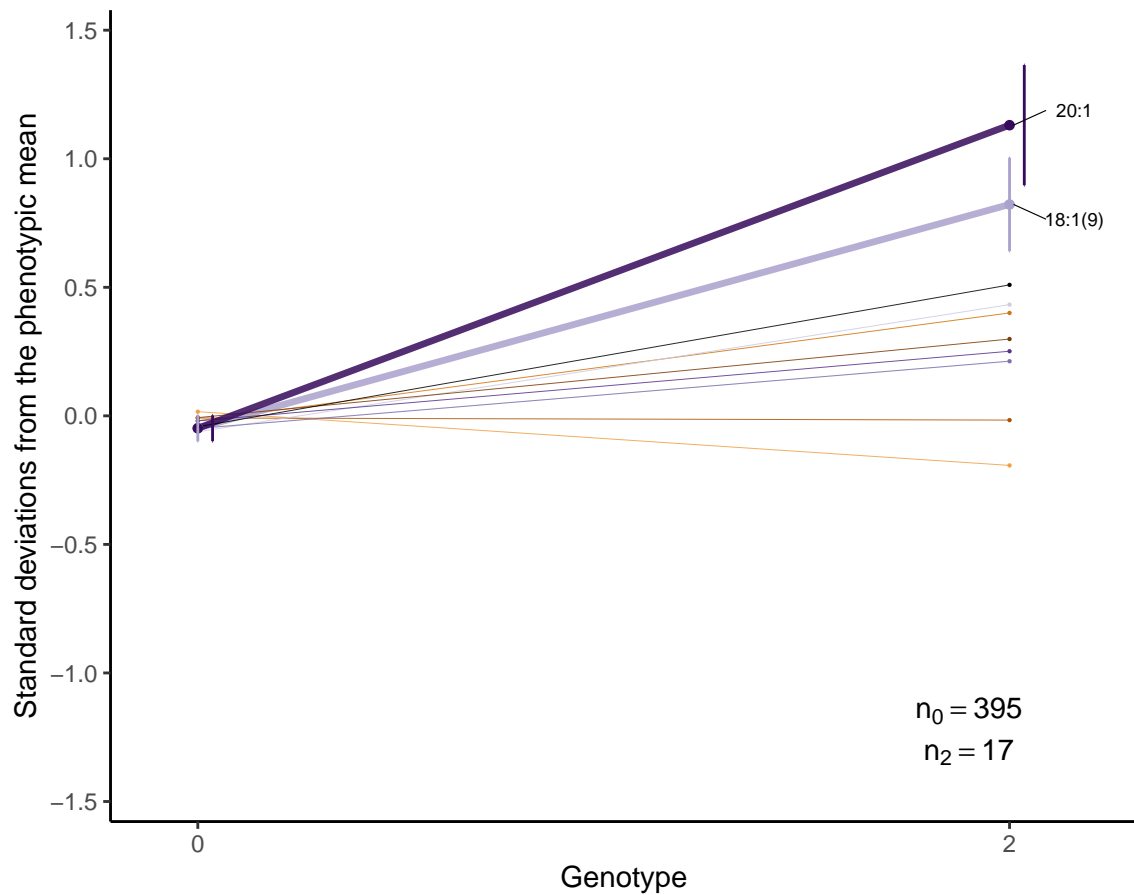

avgbs\_cluster\_37714.1.11 – Mrg02

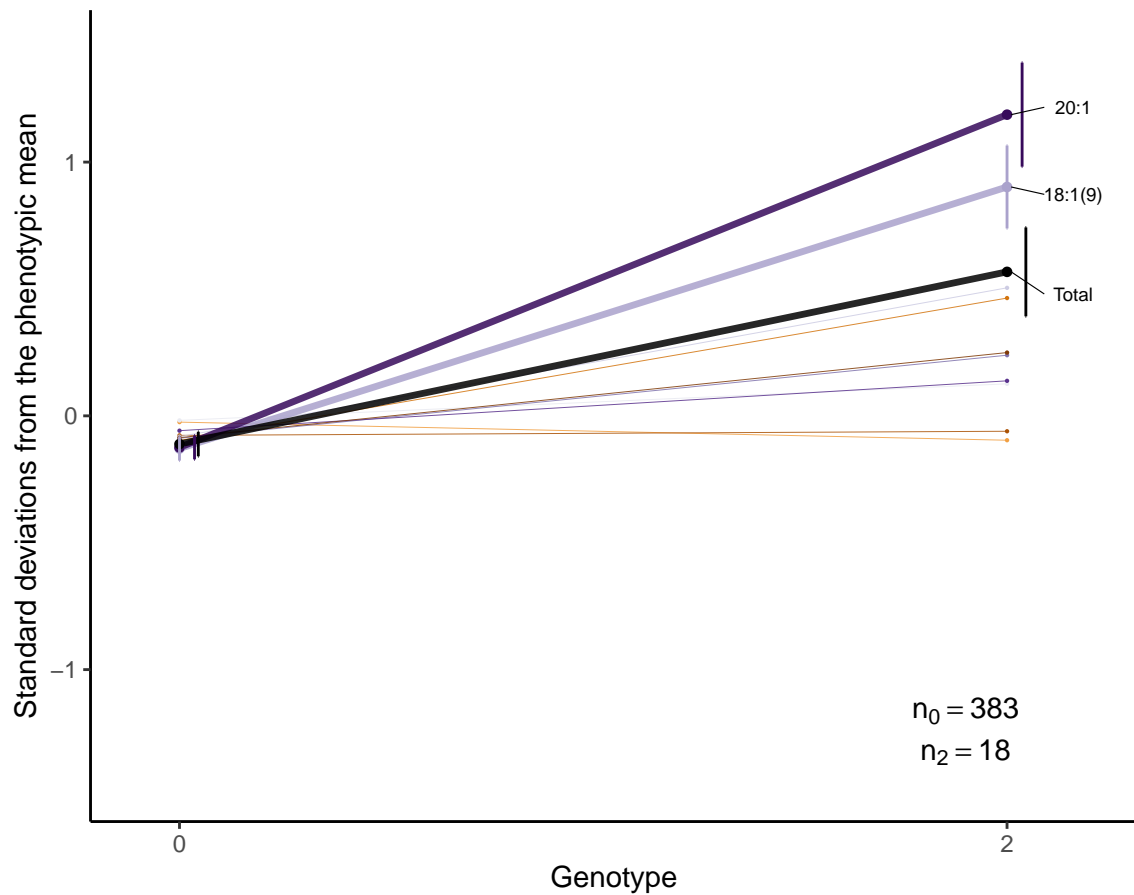

avgs2\_68640.2.24 – Mrg11

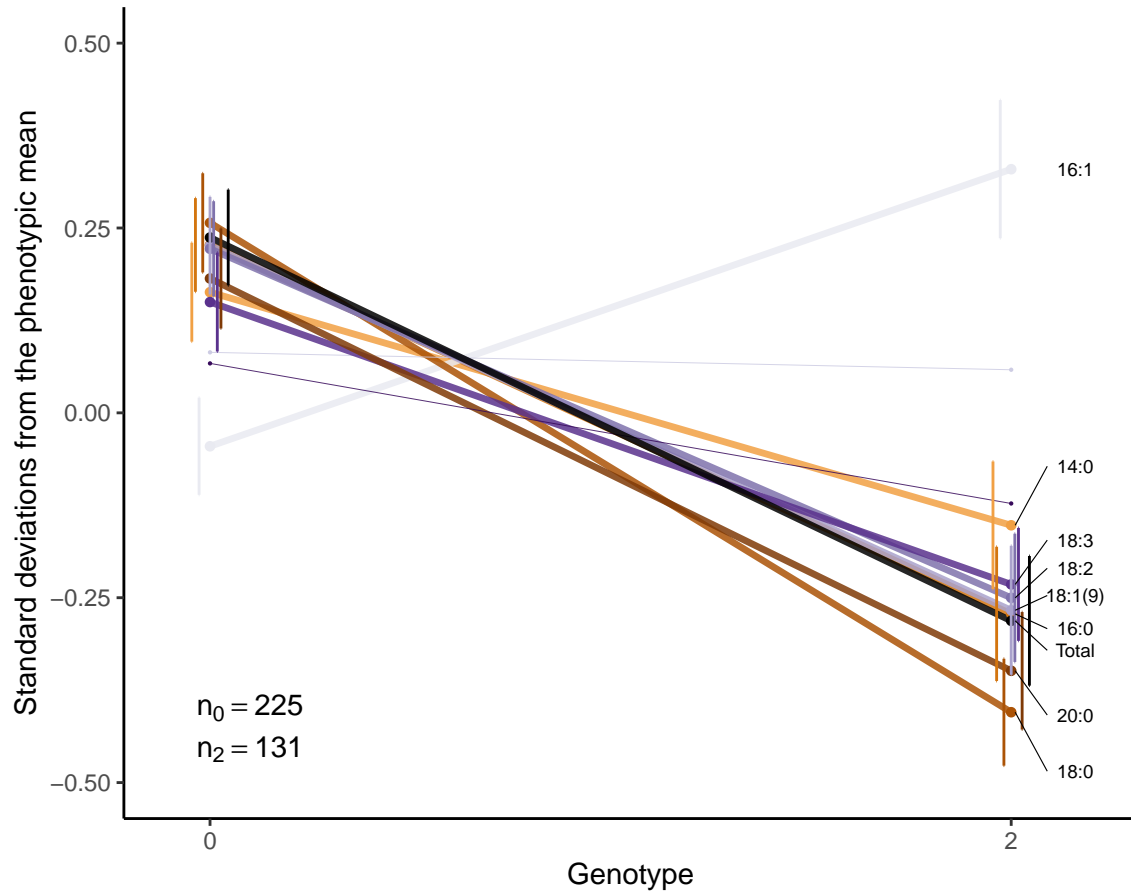

avgs2\_1455.1.62 – Mrg11

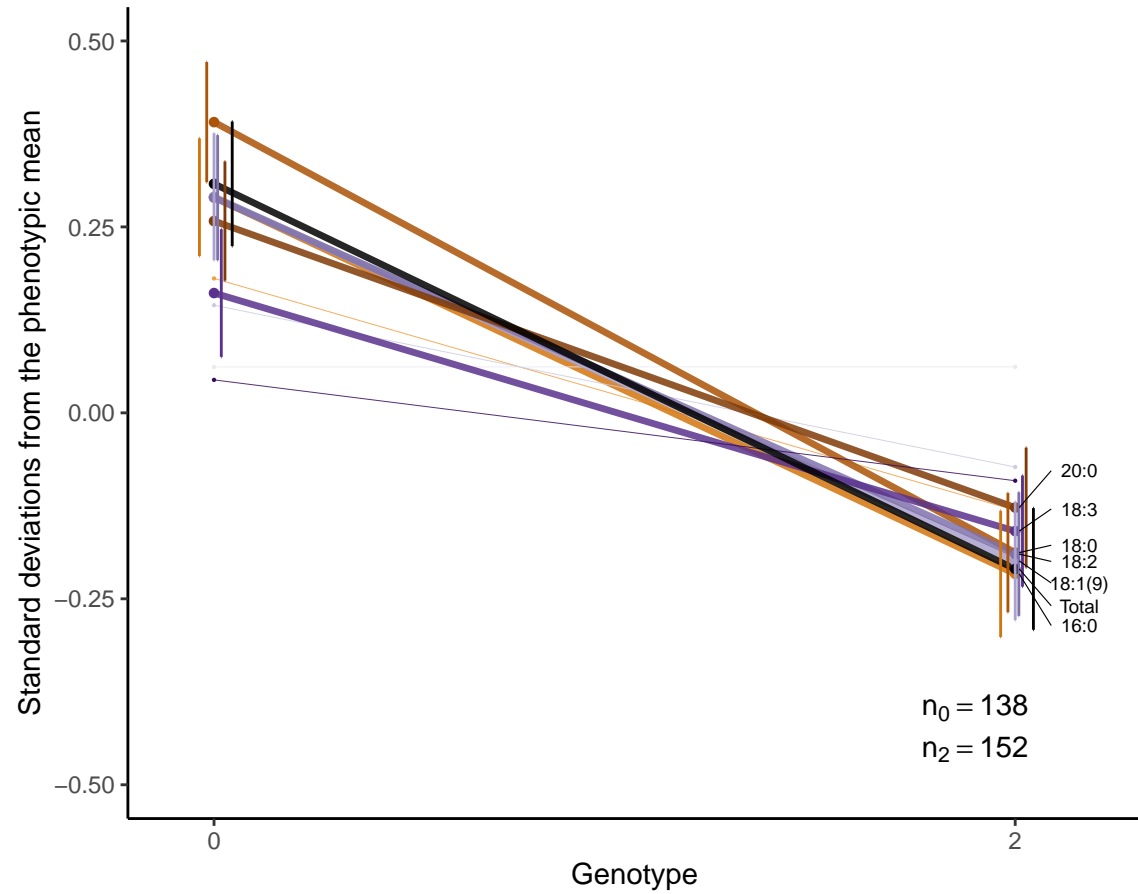

avgs2\_8667.2.20 – Mrg11

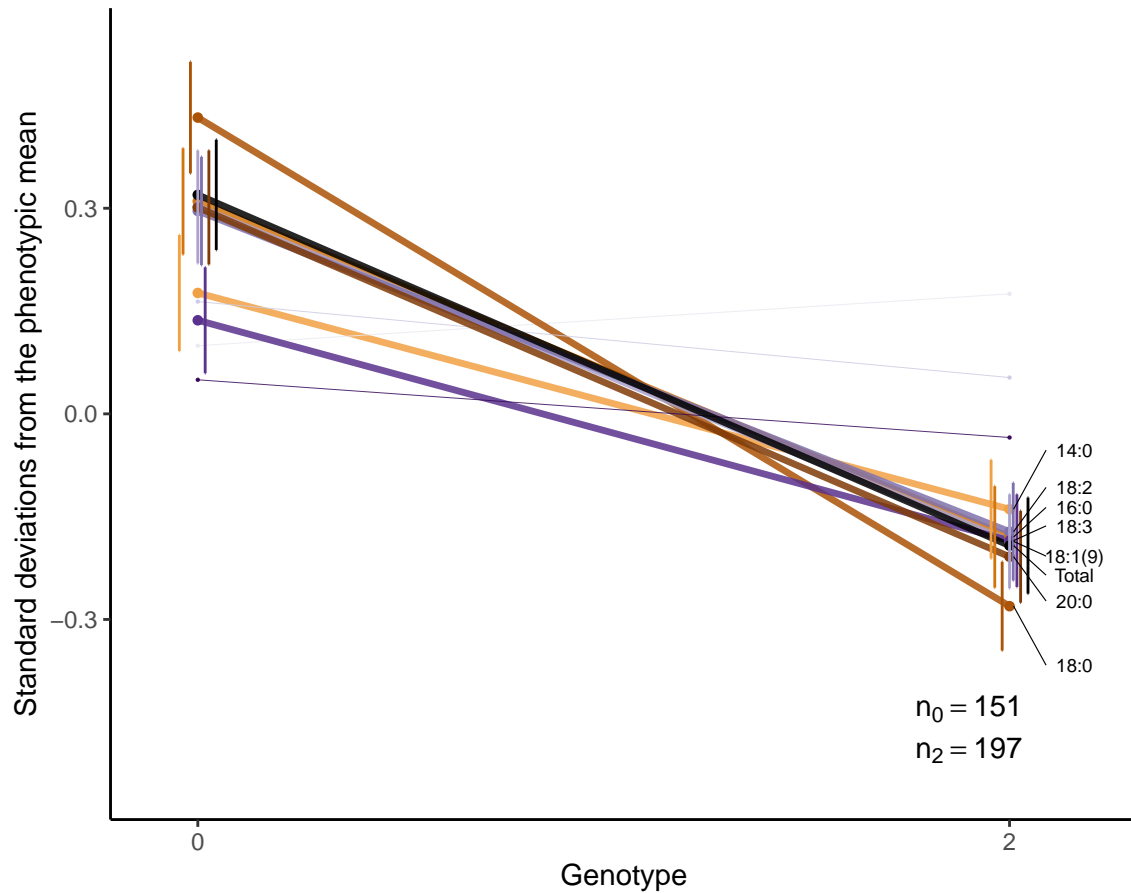

avgs\_cluster\_4185.1.10 – Mrg11

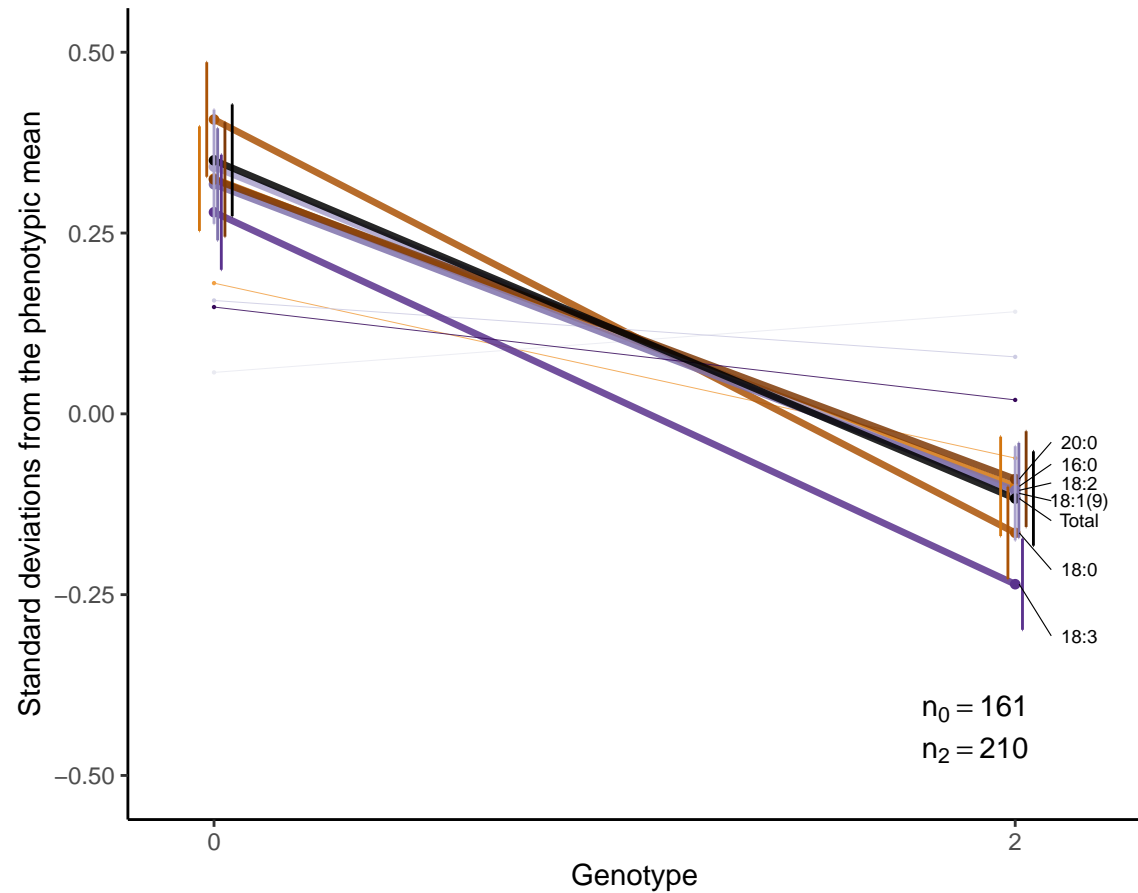

avgs2\_8476.1.36 – Mrg11

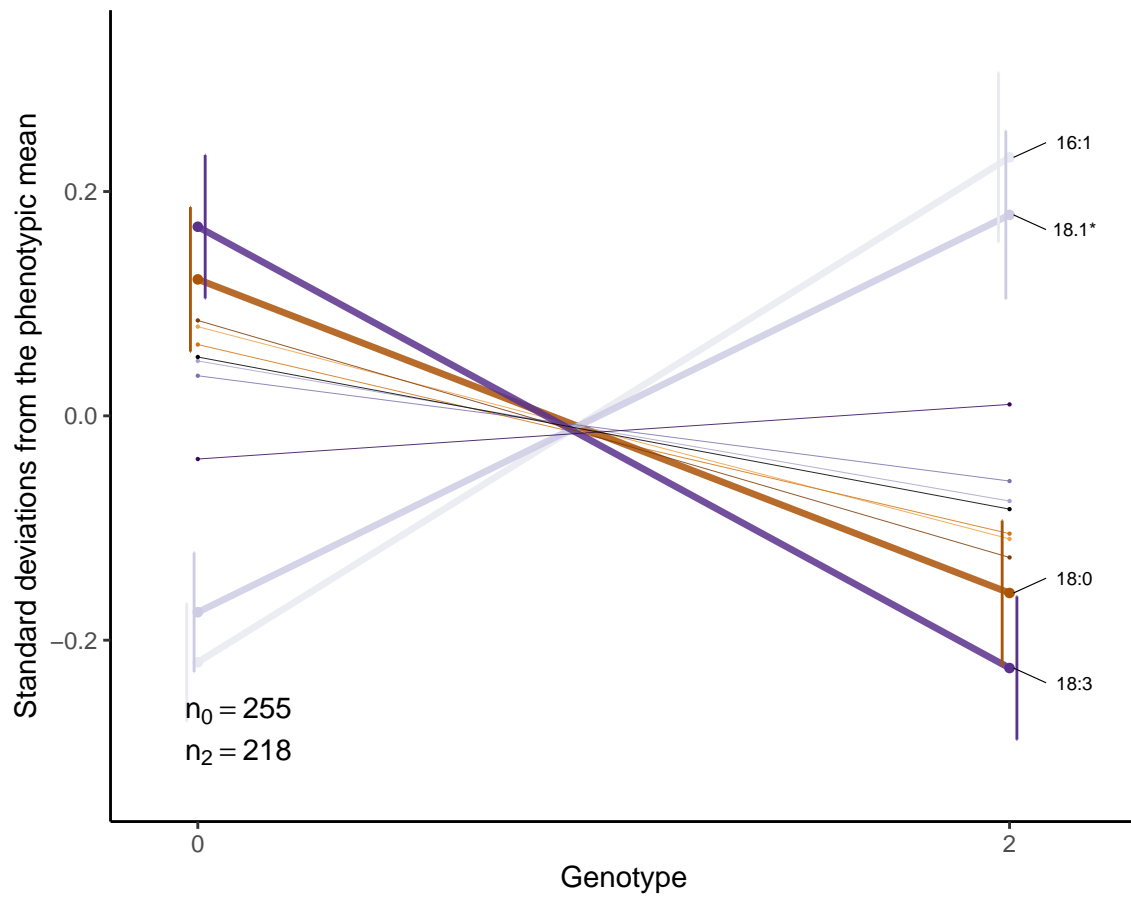

avgs2\_13643.1.45 – Mrg11

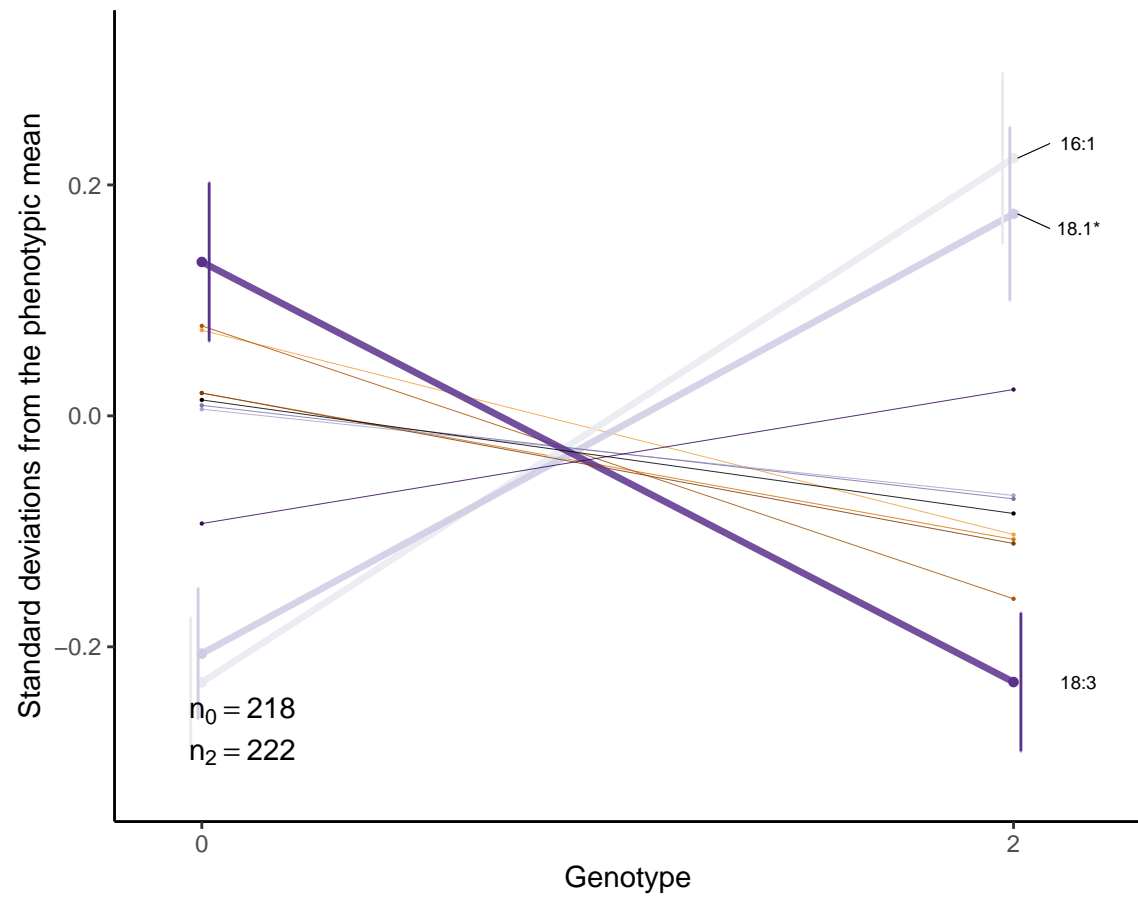

avgbs\_cluster\_41270.1.48 – MrgNA

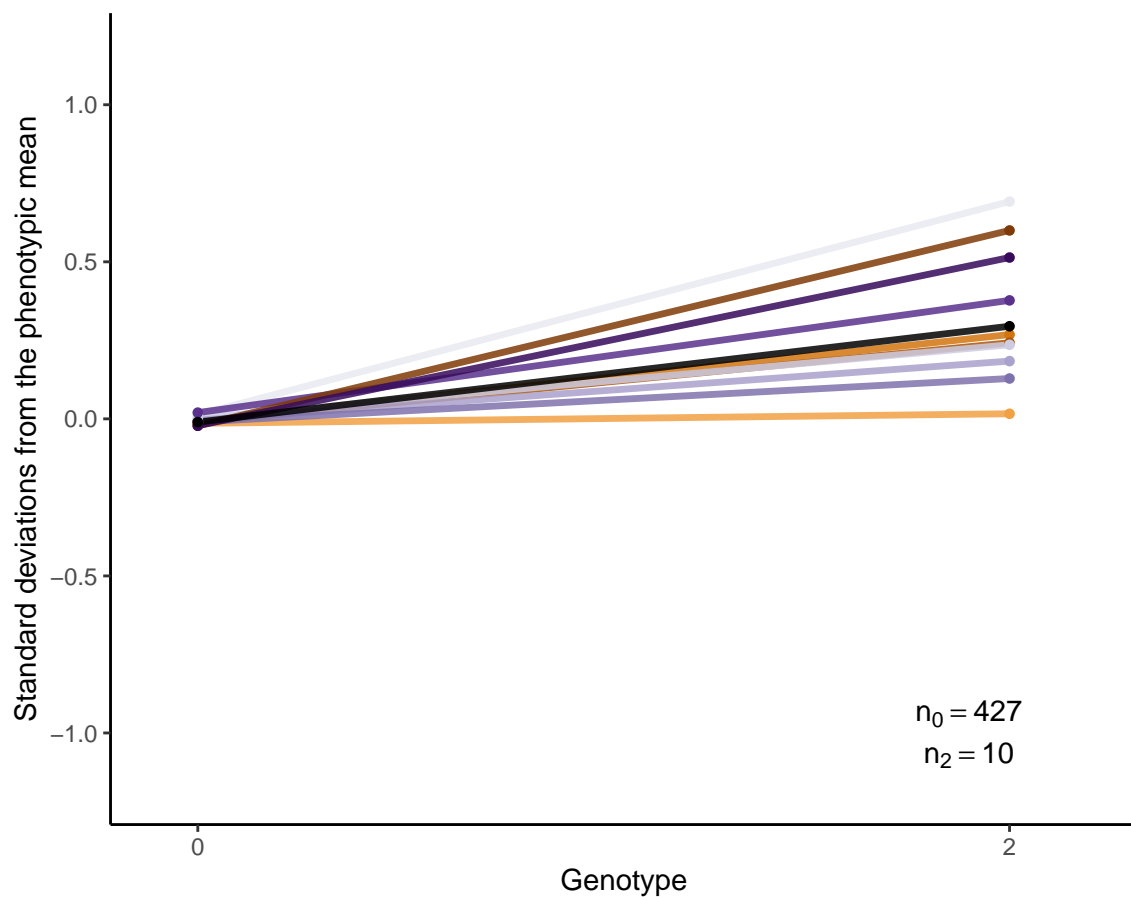

avgbs\_cluster\_28375.1.13 – Mrg12

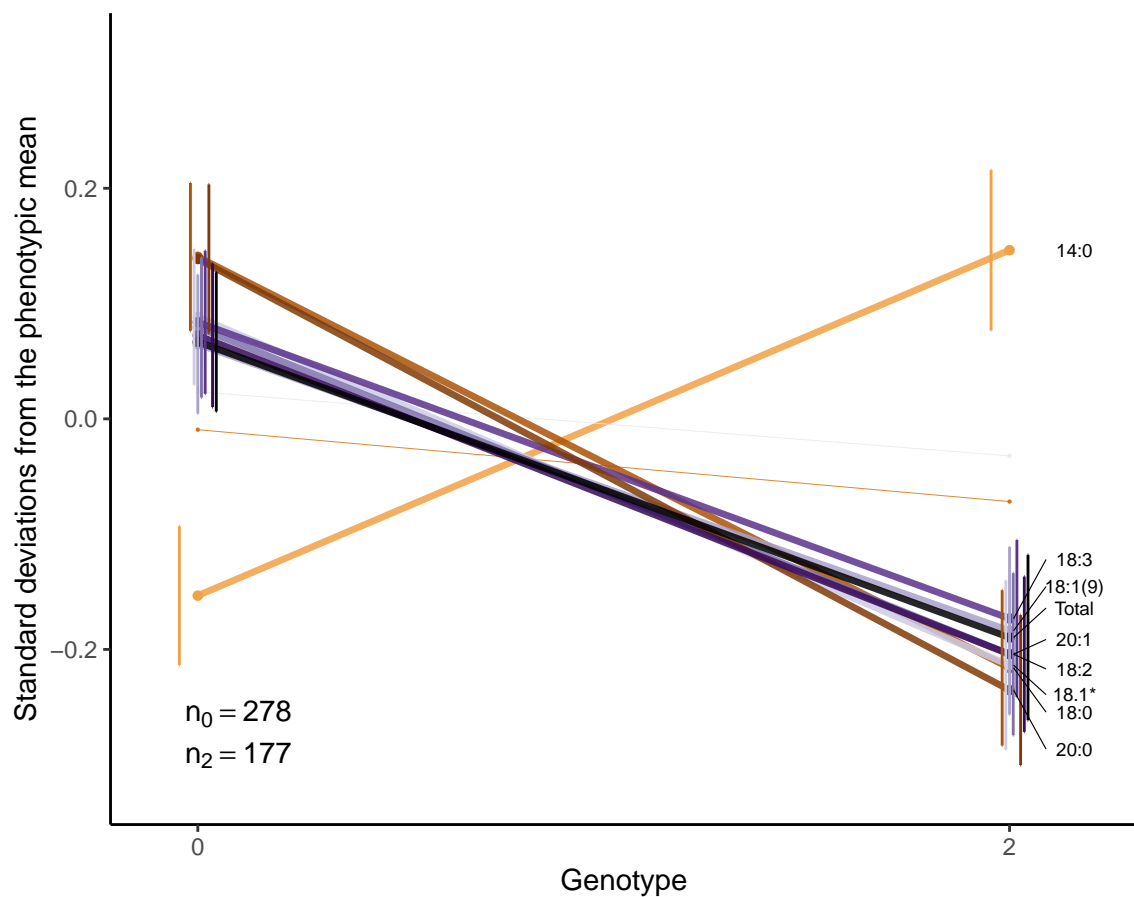

avgbs\_cluster\_25365.1.22 – MrgNA

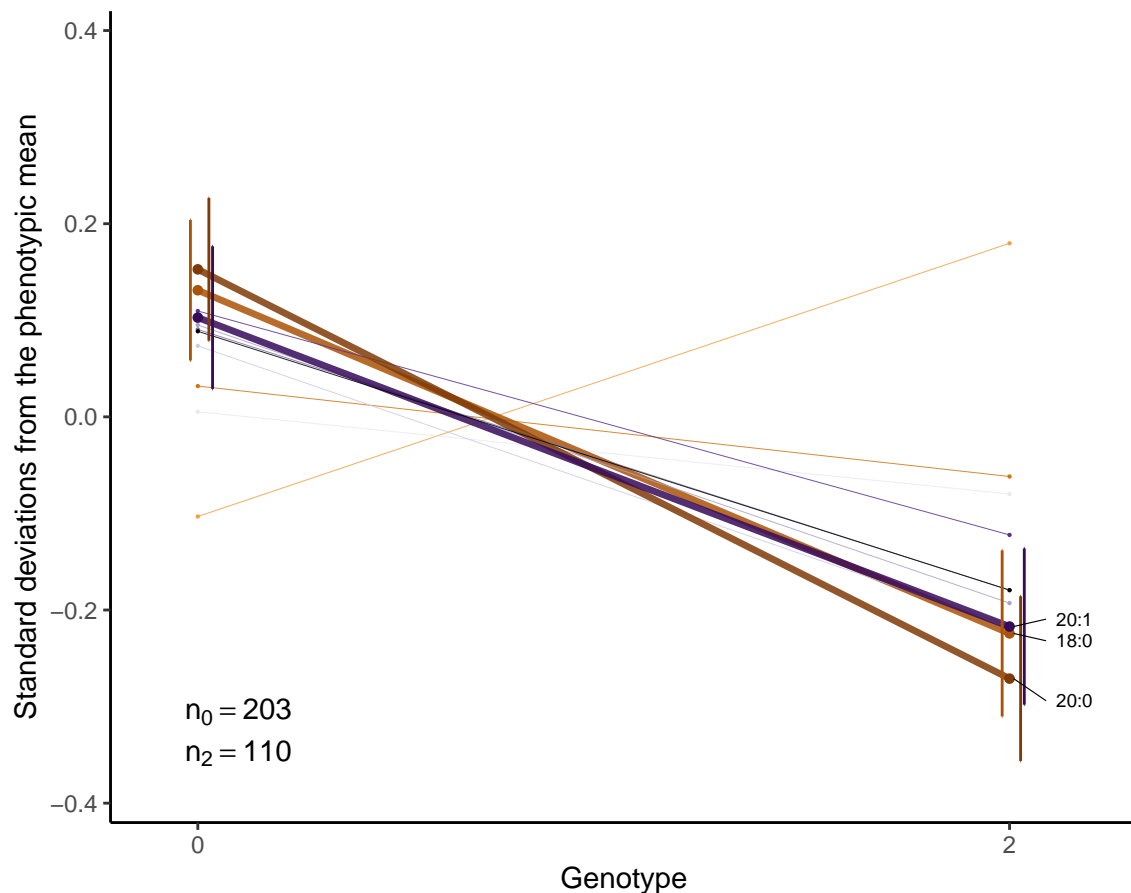

avgbs2\_118750.1.22 – MrgNA

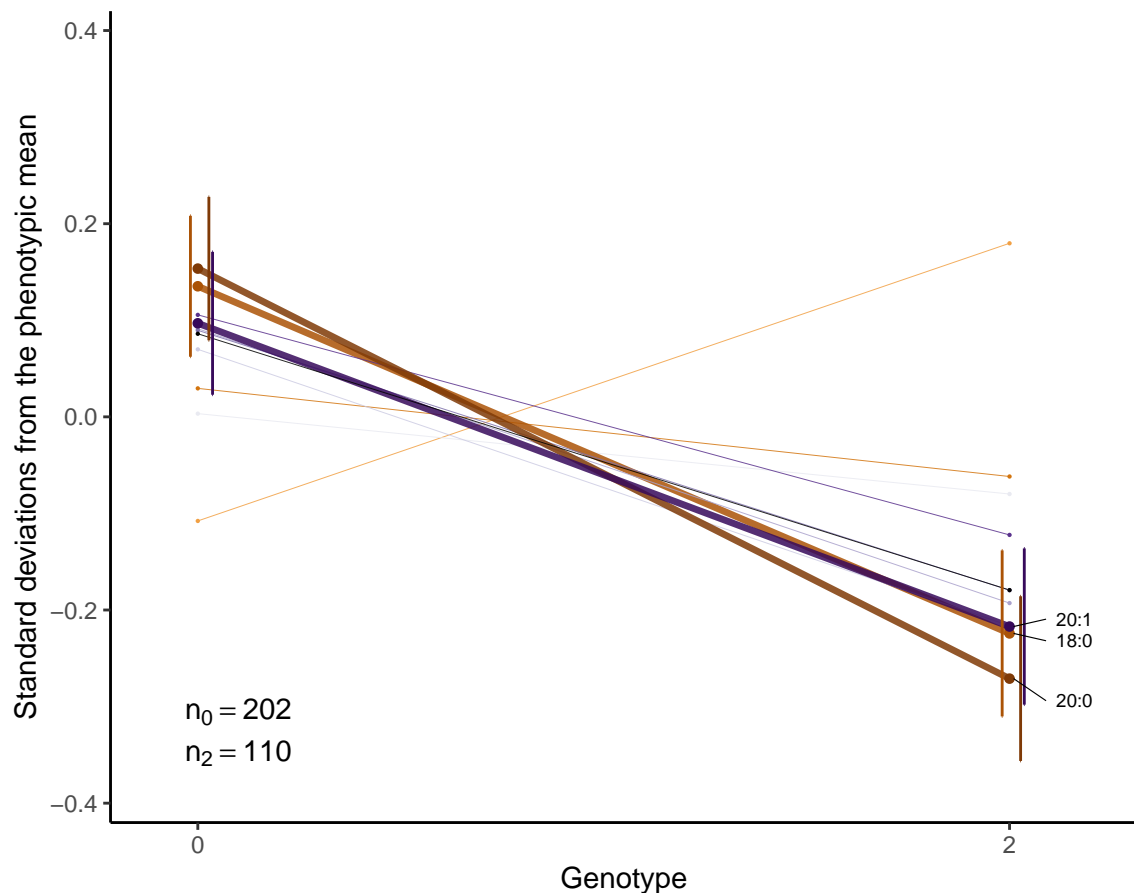

avgbs\_cluster\_27294.1.27 – MrgNA

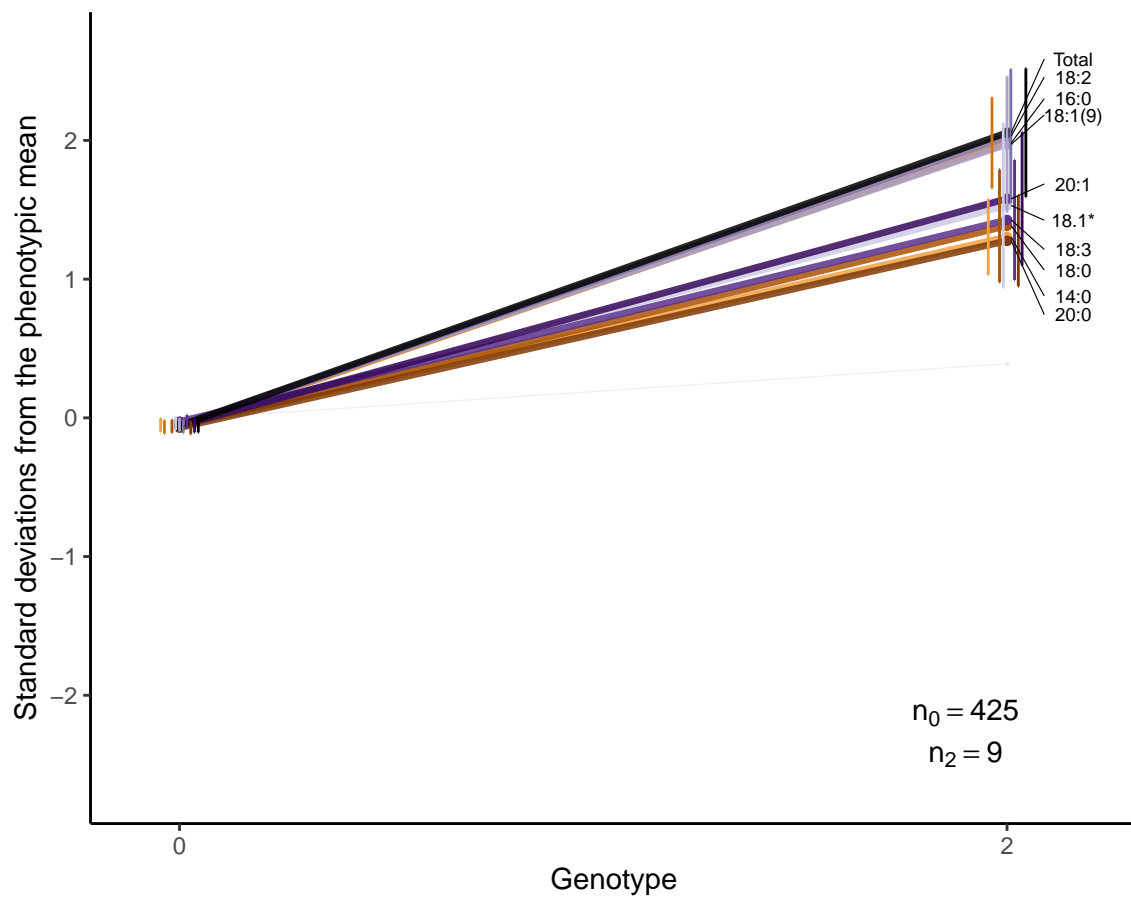

avgbs2\_90110.1.11 – MrgNA

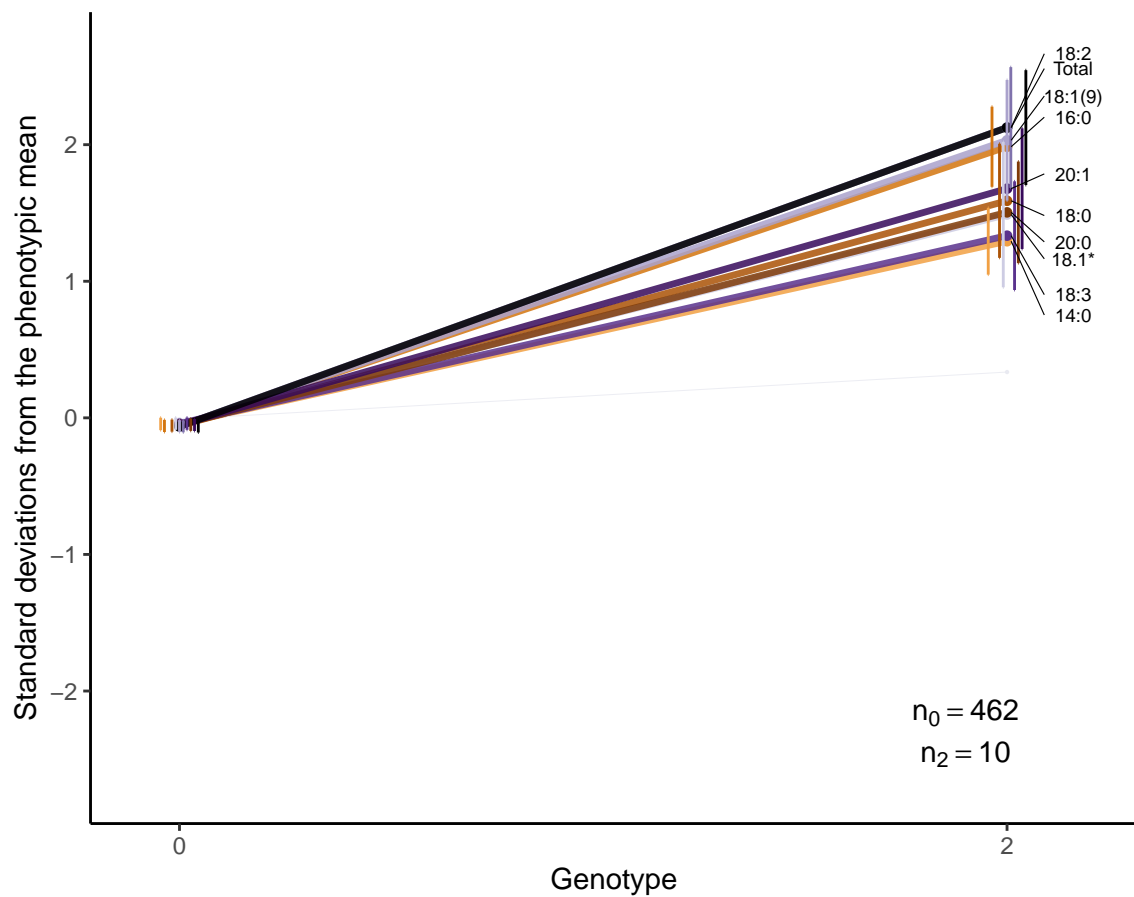

avgbs2\_168596.1.12 – MrgNA

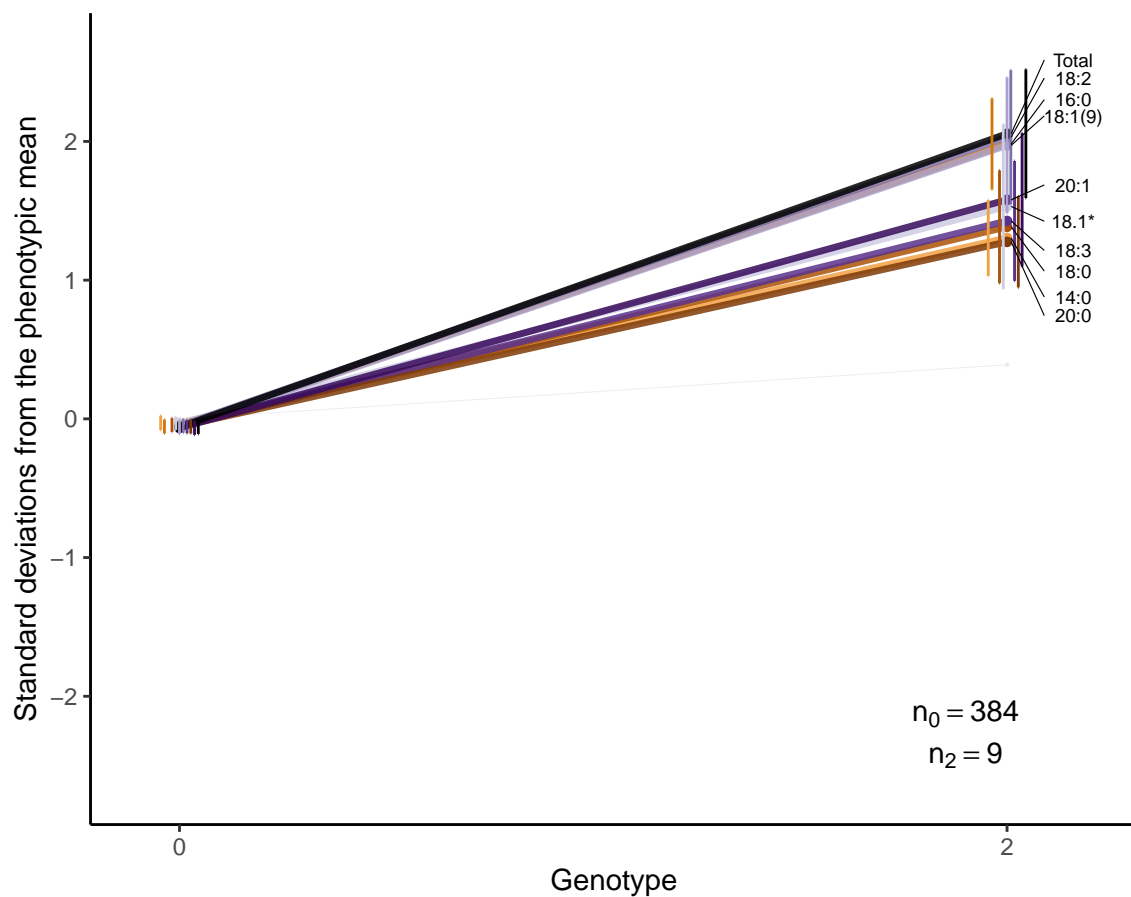

avgbs\_cluster\_11066.1.27 – MrgNA

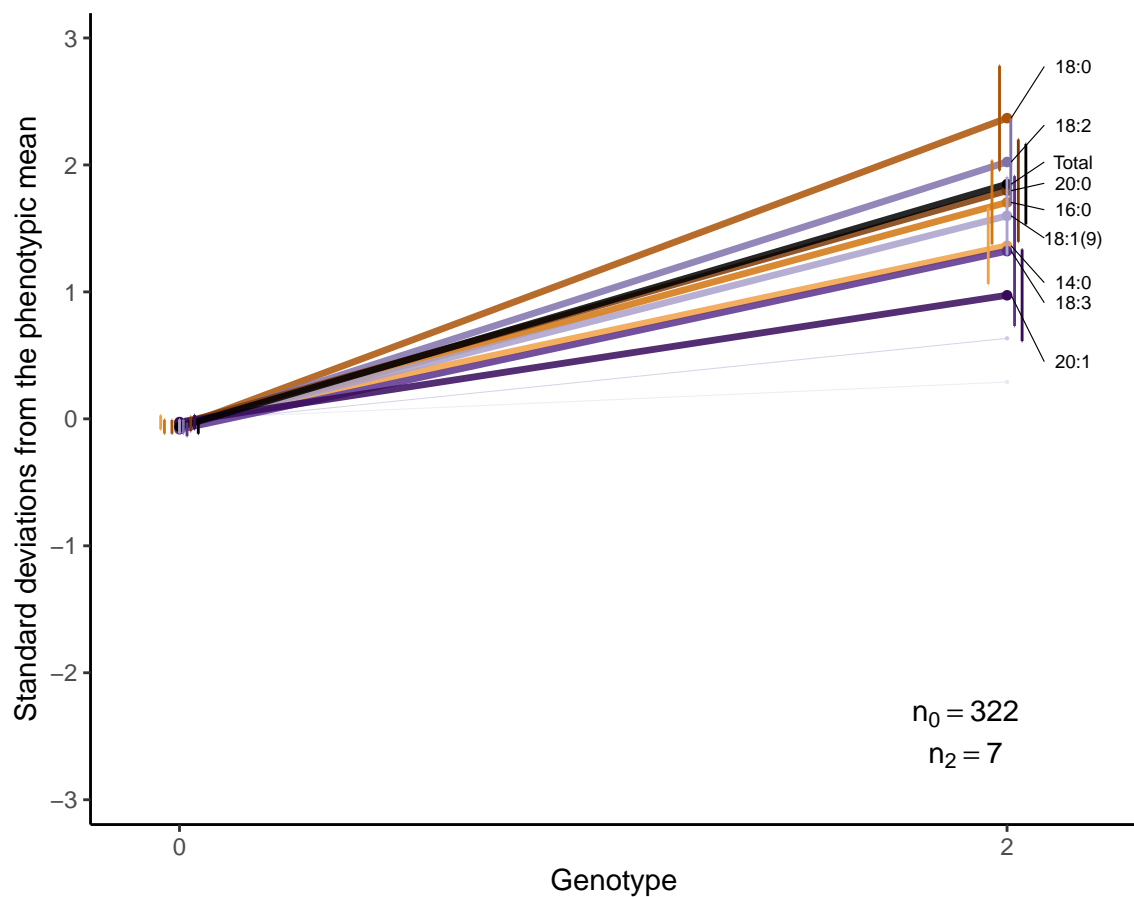

avgbs\_cluster\_31003.1.42 – MrgNA

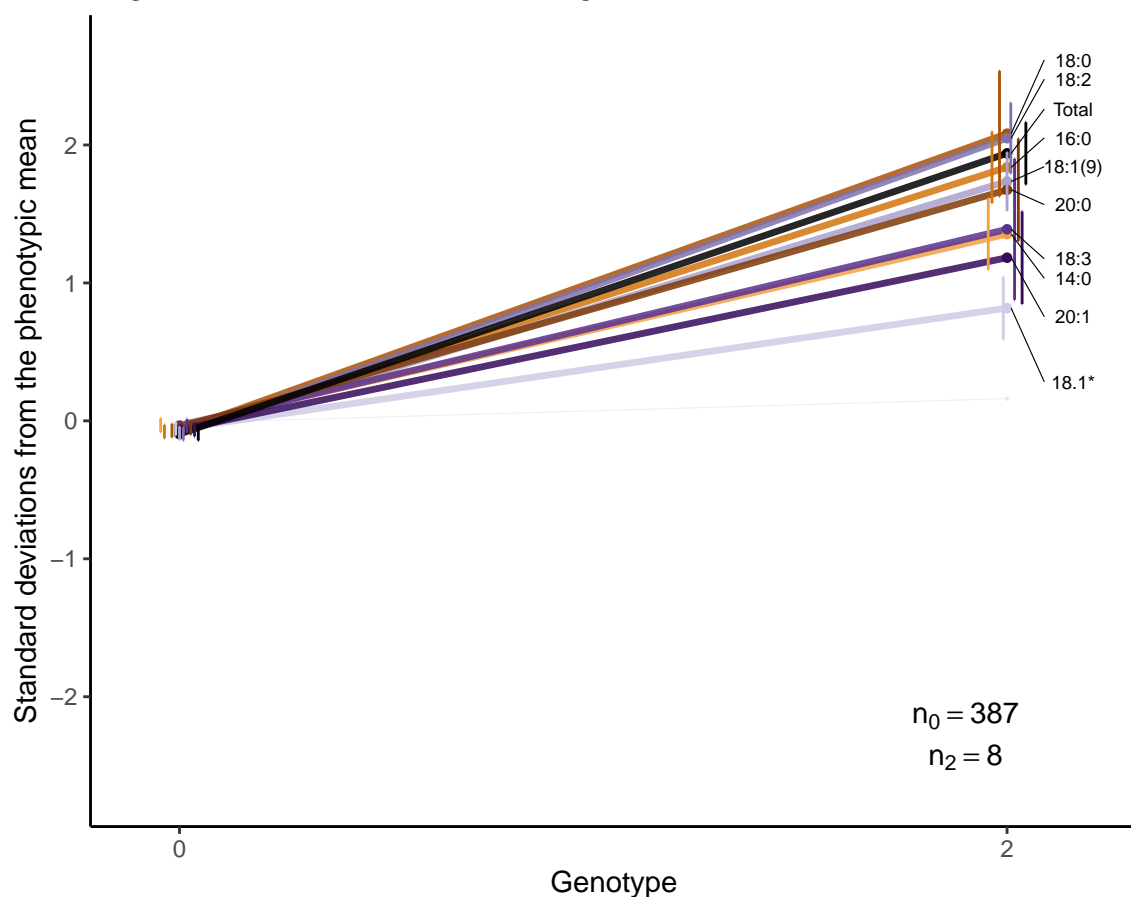

avgbs2\_92177.2.25 – MrgNA

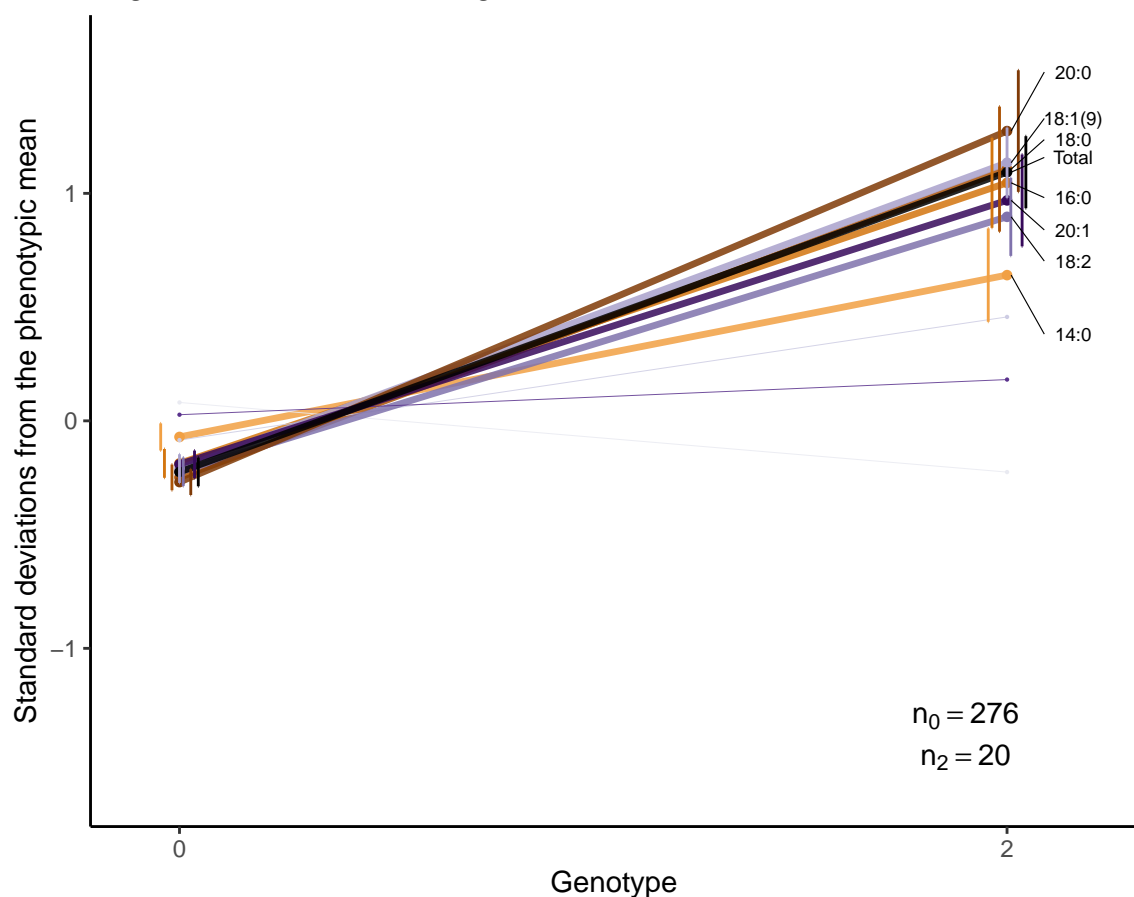

avgbs\_cluster\_26834.1.21 – Mrg21

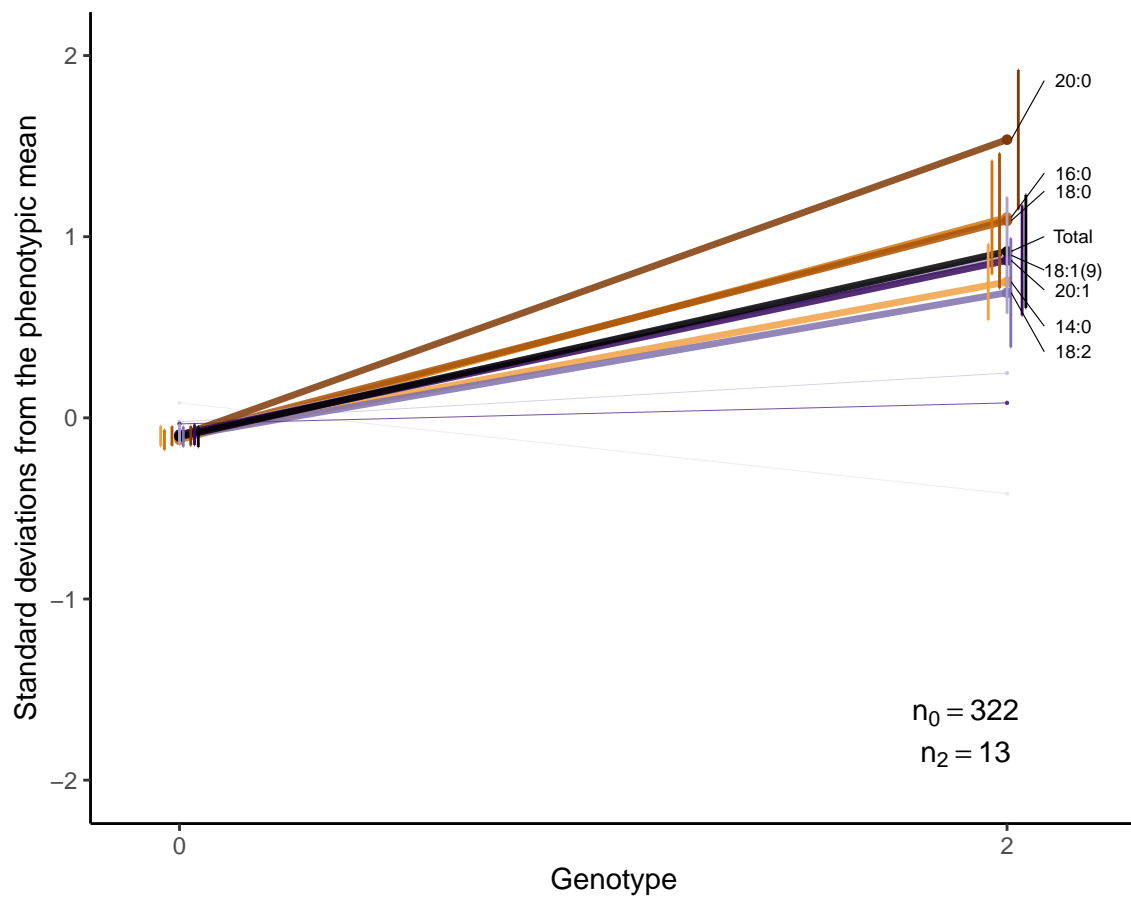

avgbs\_cluster\_23796.1.34 – Mrg21

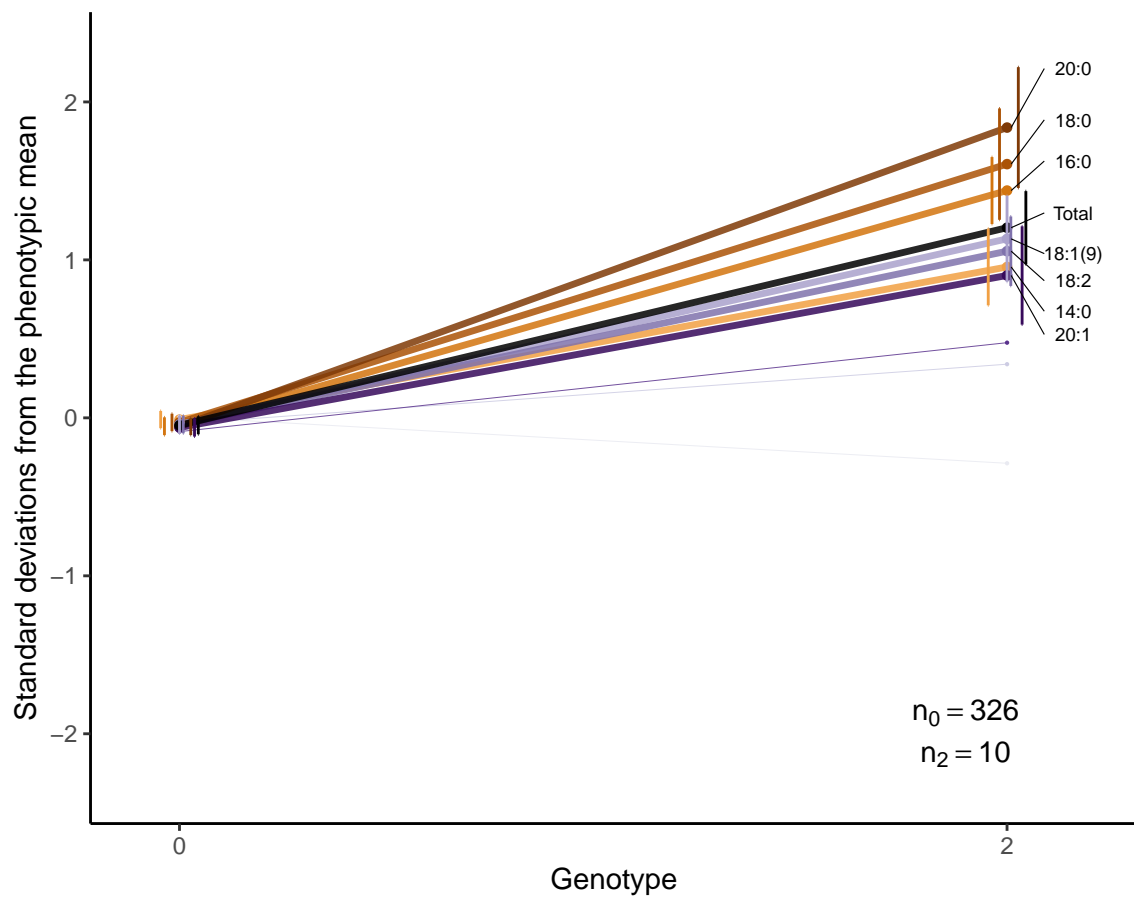

avgbs\_cluster\_38648.1.56 – Mrg21

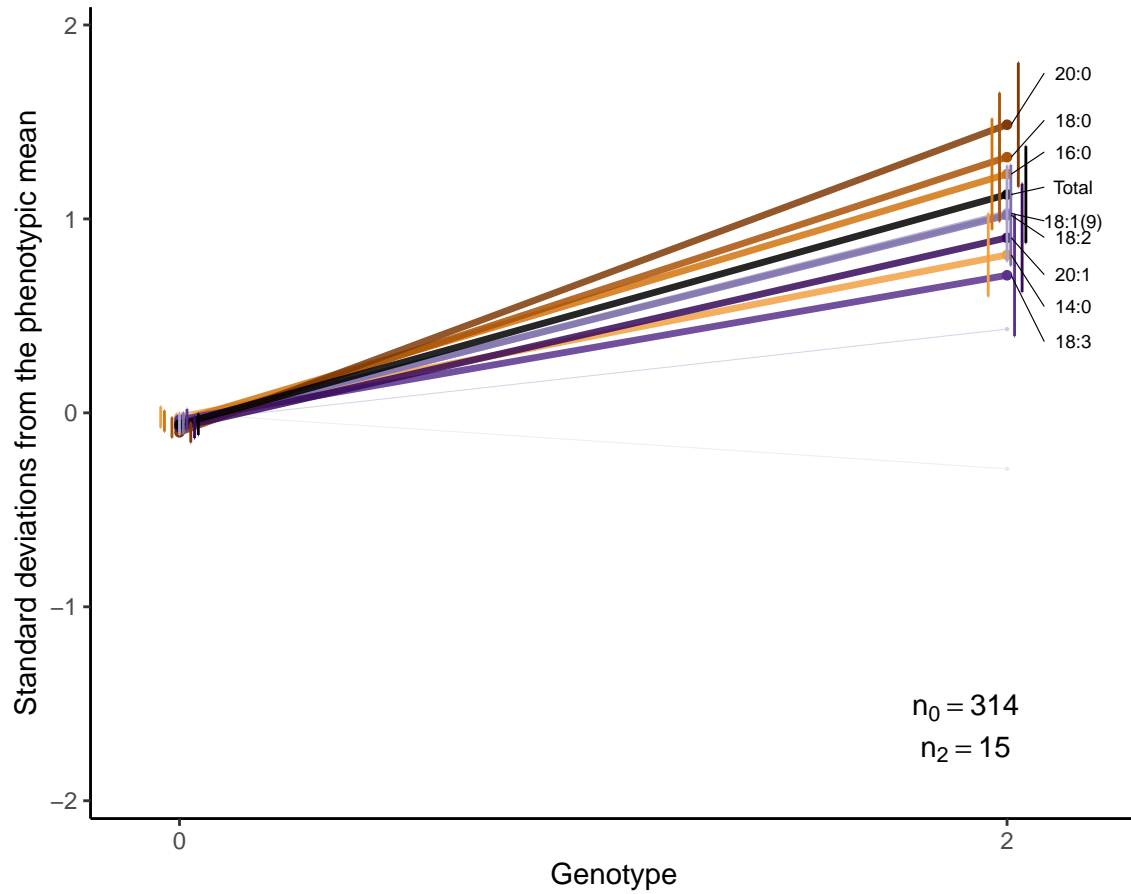

avgbs\_5734.1.36 – Mrg21

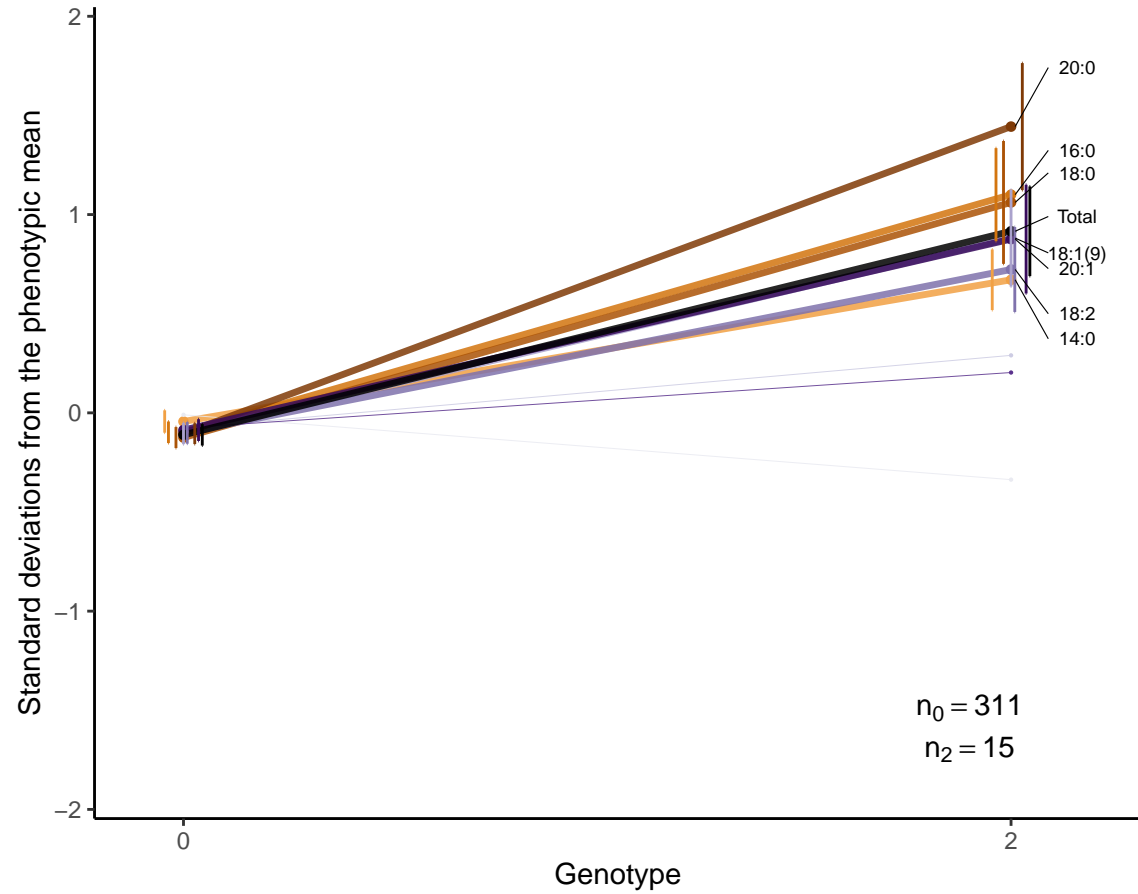

avgbs\_cluster\_25404.1.25 – MrgNA

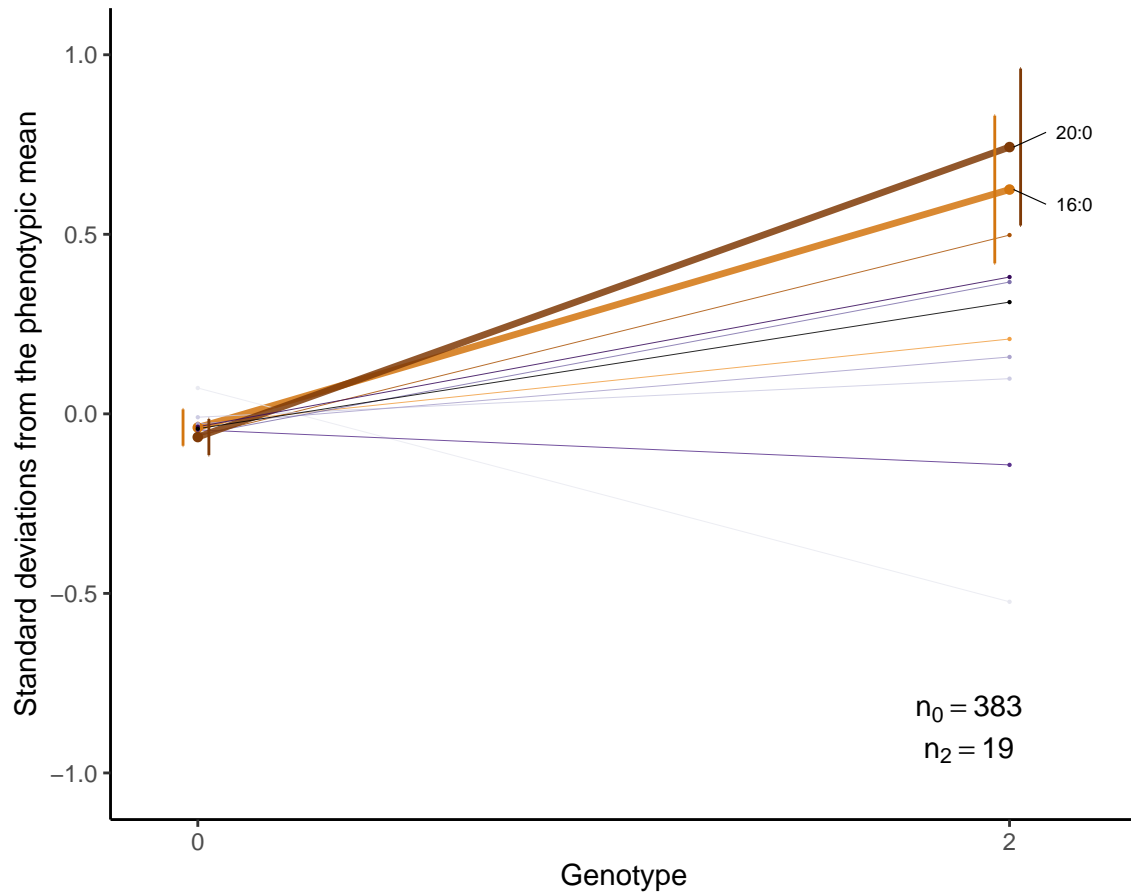

avgbs\_414137.1.27 – Mrg01

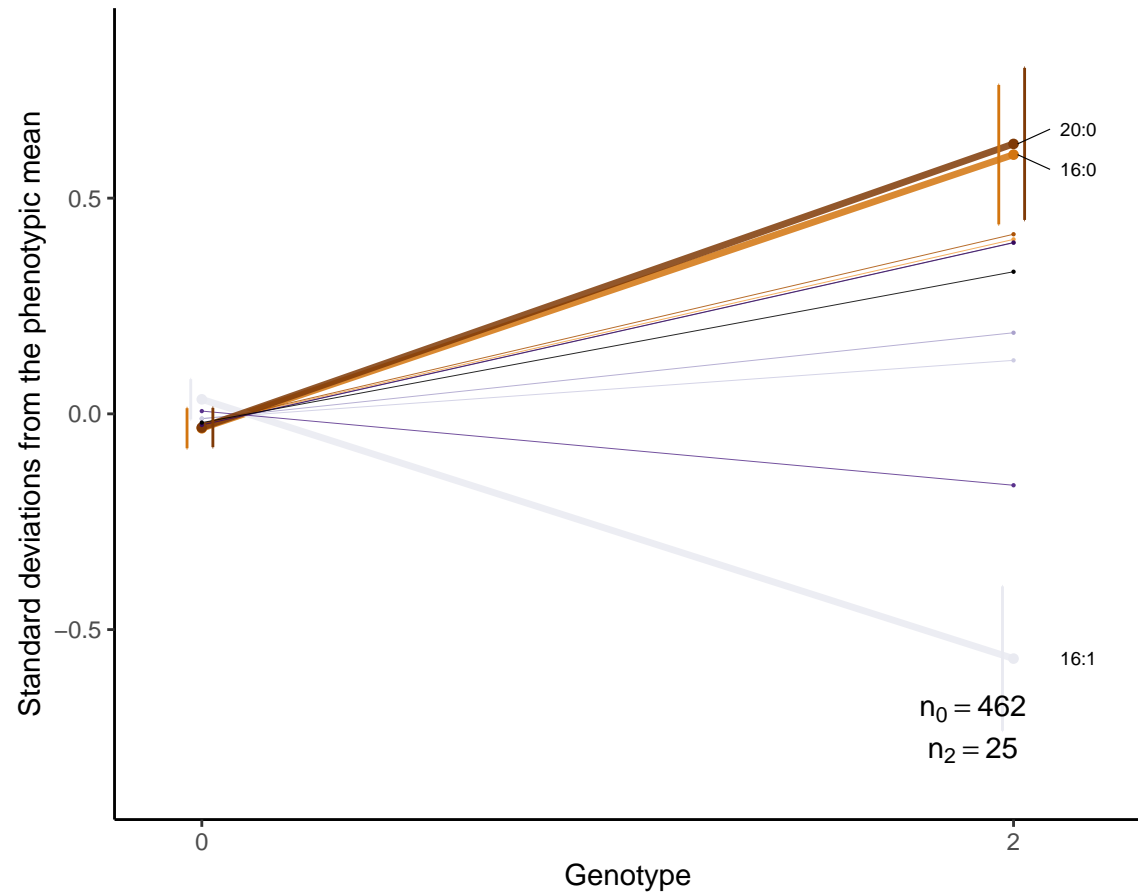

avgbs\_244387.1.61 – Mrg06

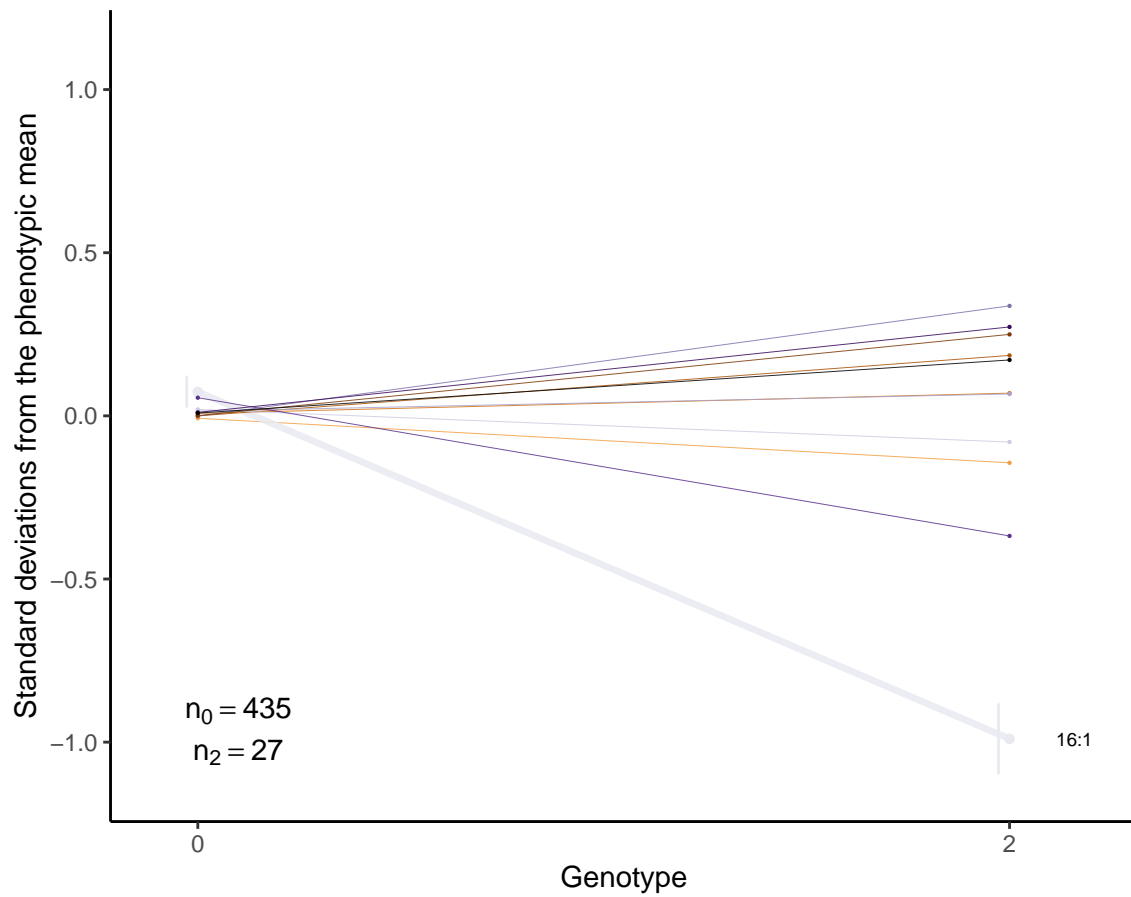

avgbs\_cluster\_48726.1.62 – Mrg06

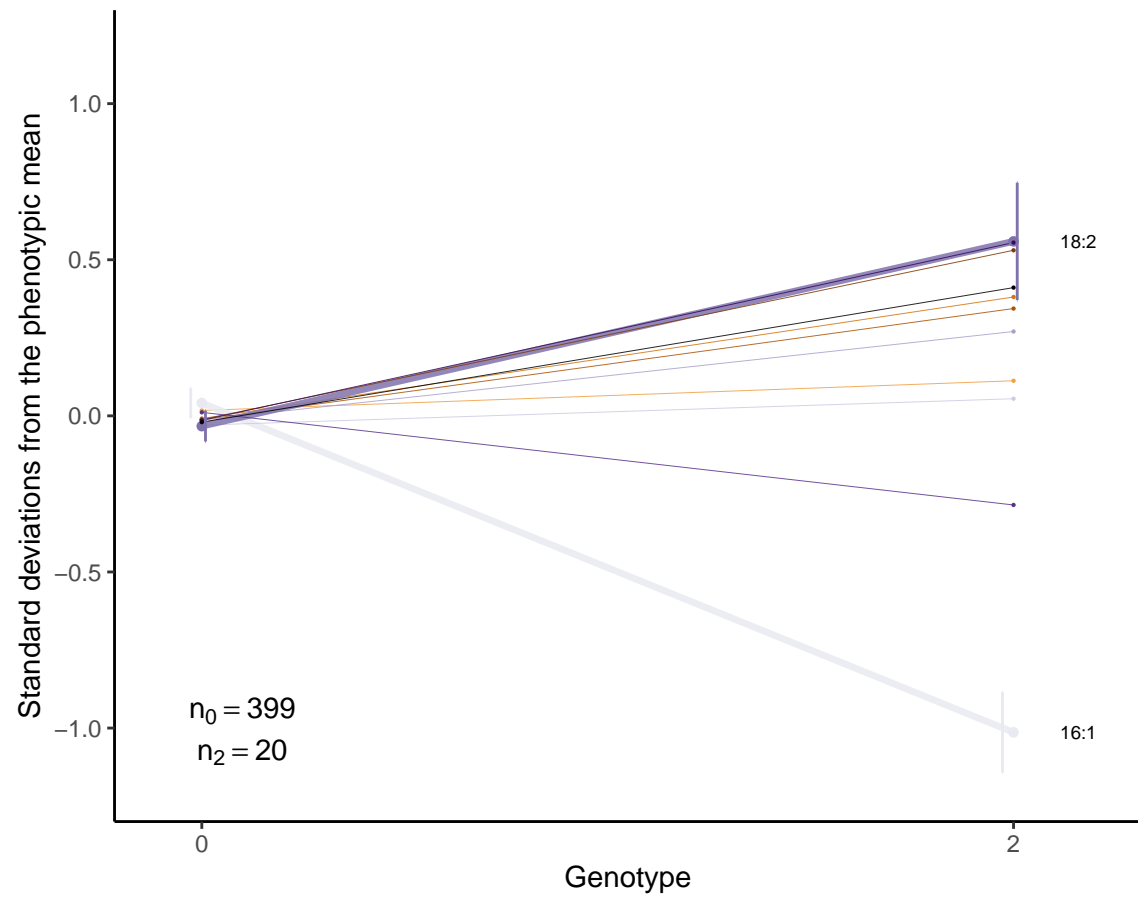

Supplement: Supplementary file [file 1]
