# Supplementary material
Source: publisher figshare collection journal article supplement (https://gsajournals.figshare.com/articles/dataset/_/7889747)

C

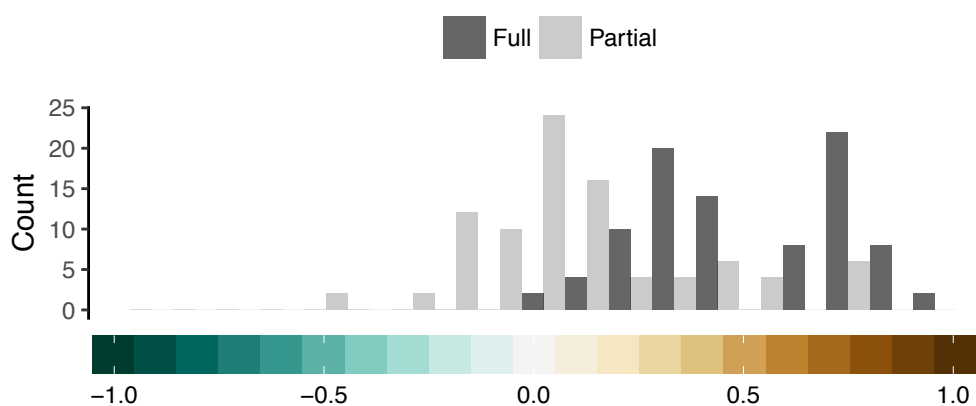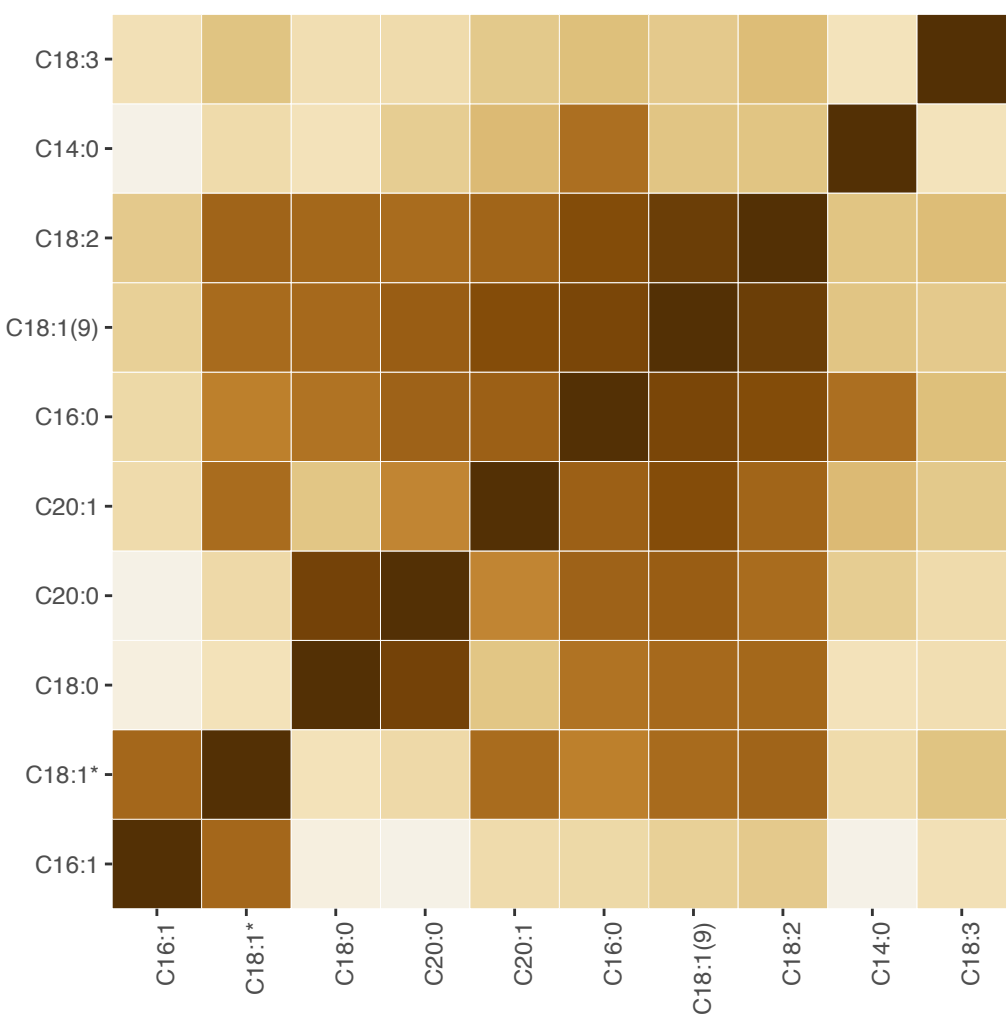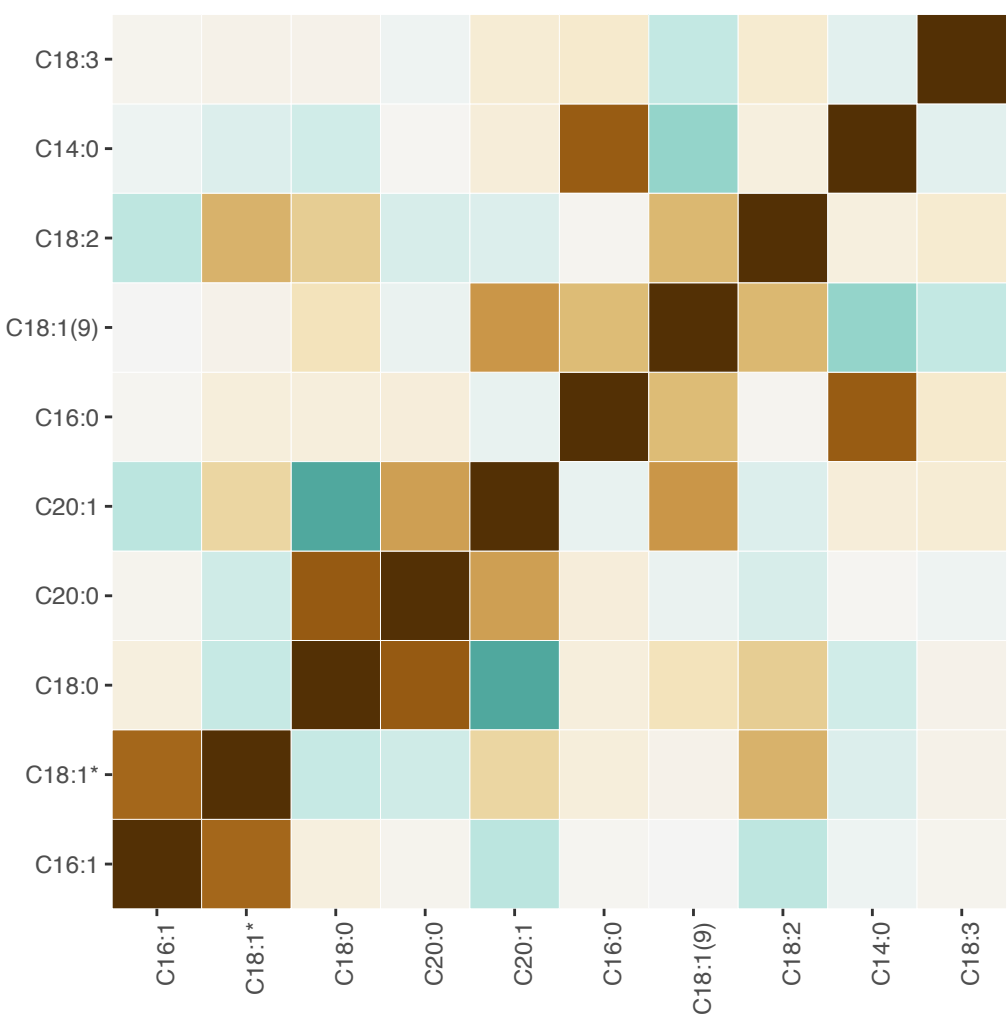

Supplement: Supplementary file [file 1]
