# Supplementary material
Source: publisher figshare collection journal article supplement (https://gsajournals.figshare.com/articles/dataset/_/7889747)

A

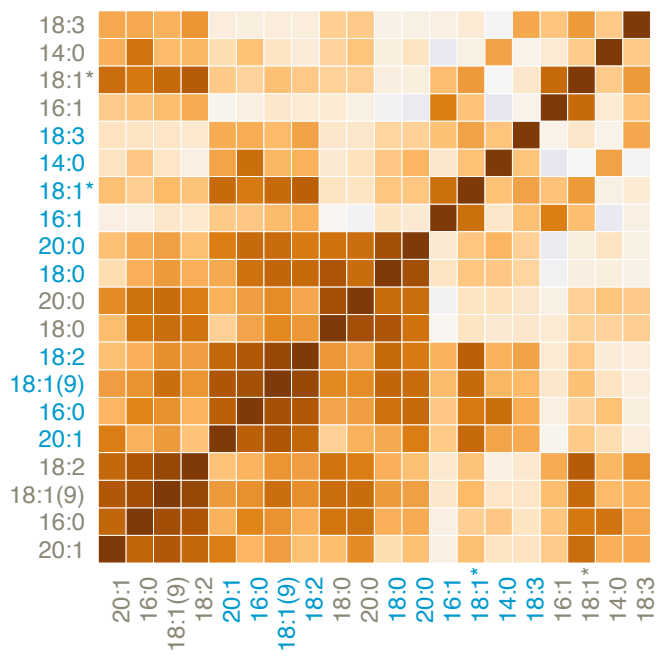

B

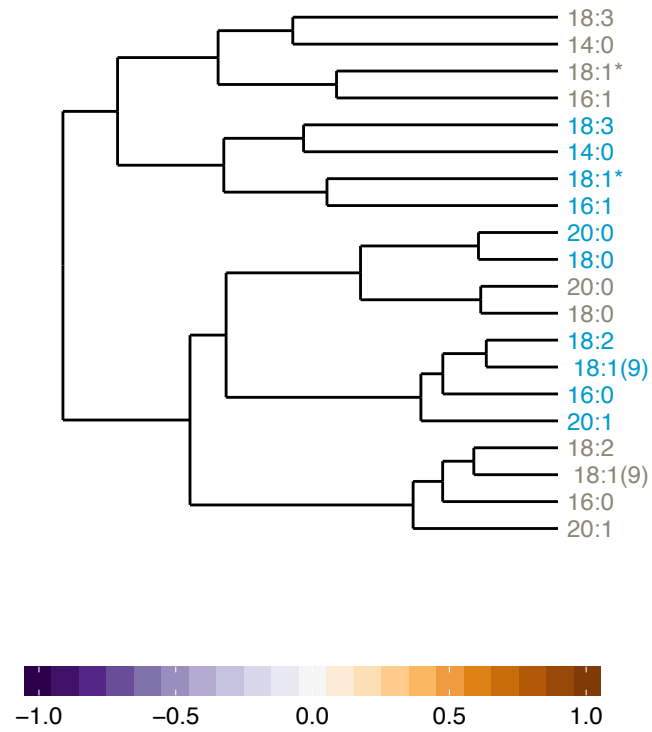

D

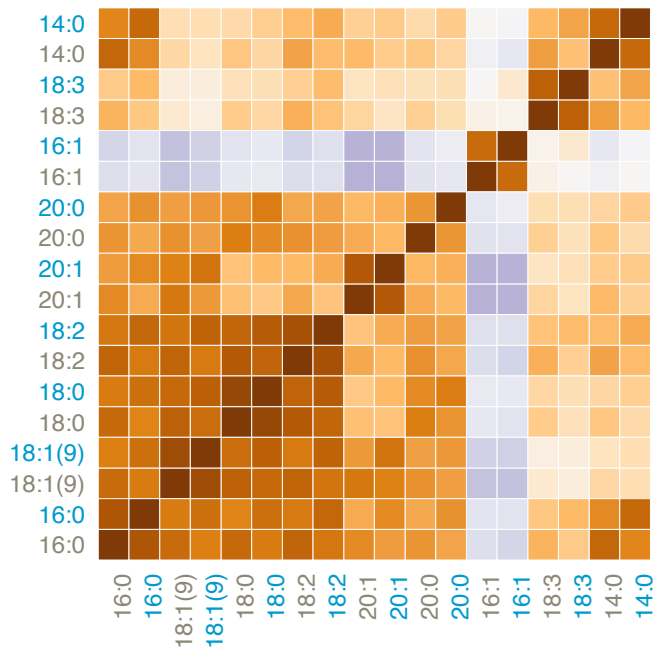

E

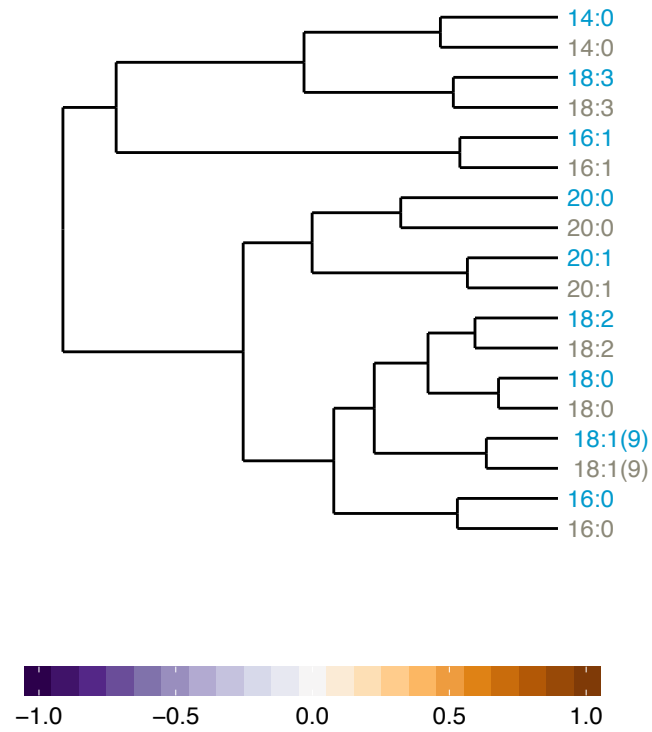

C

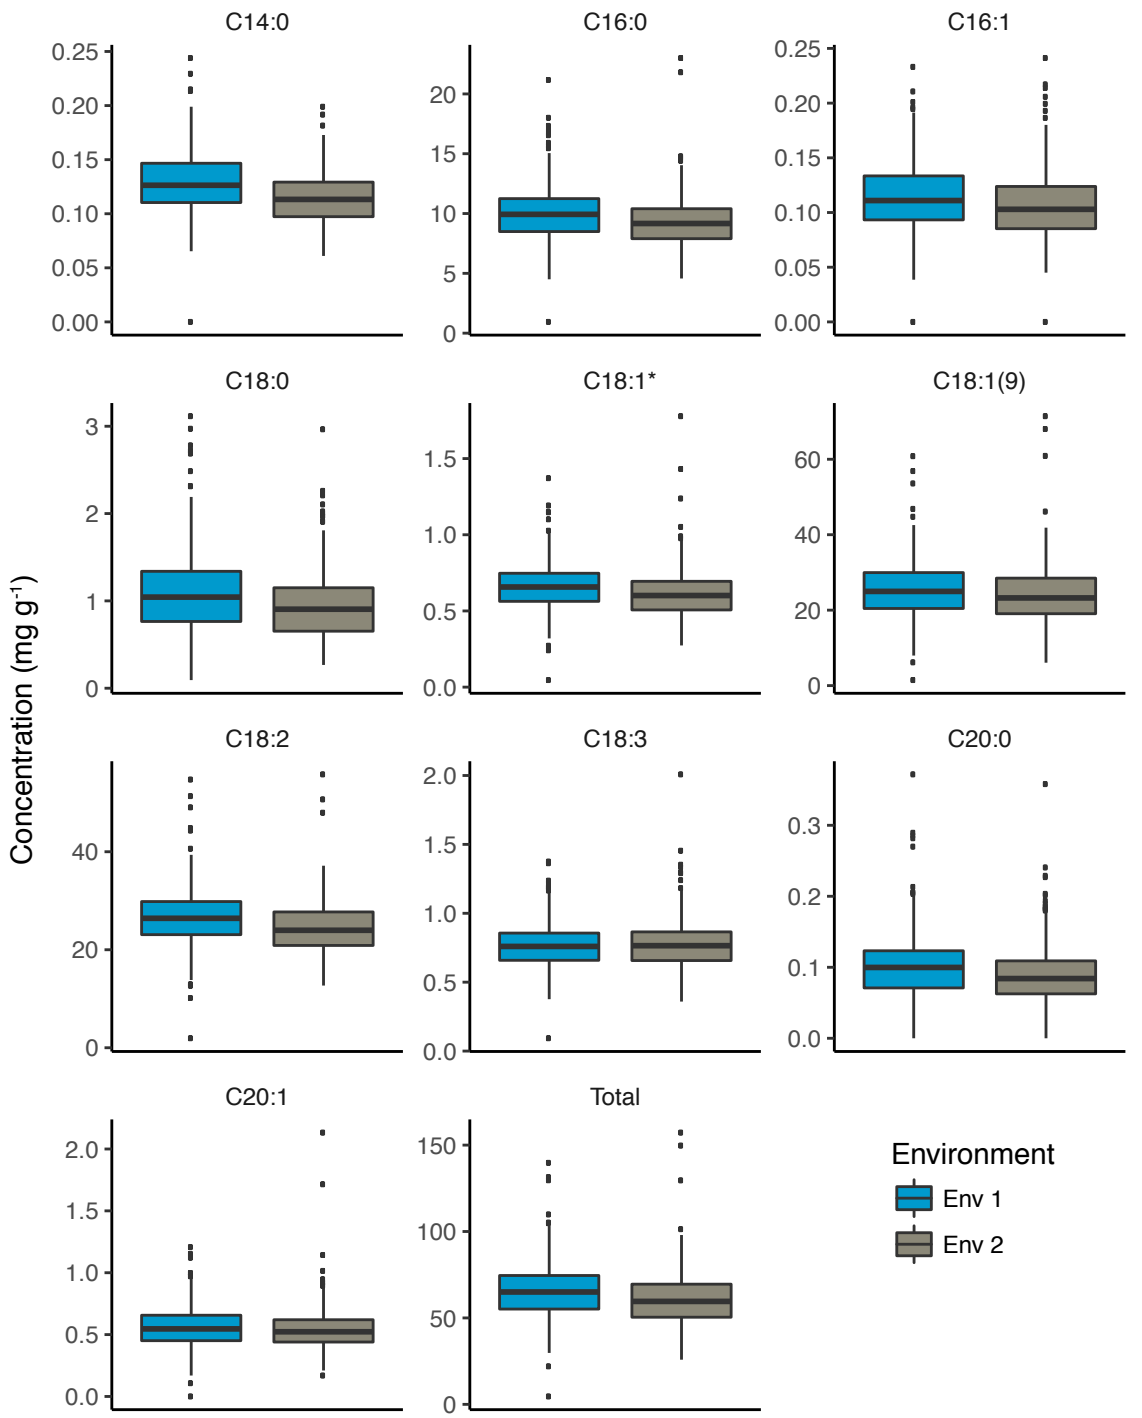

F

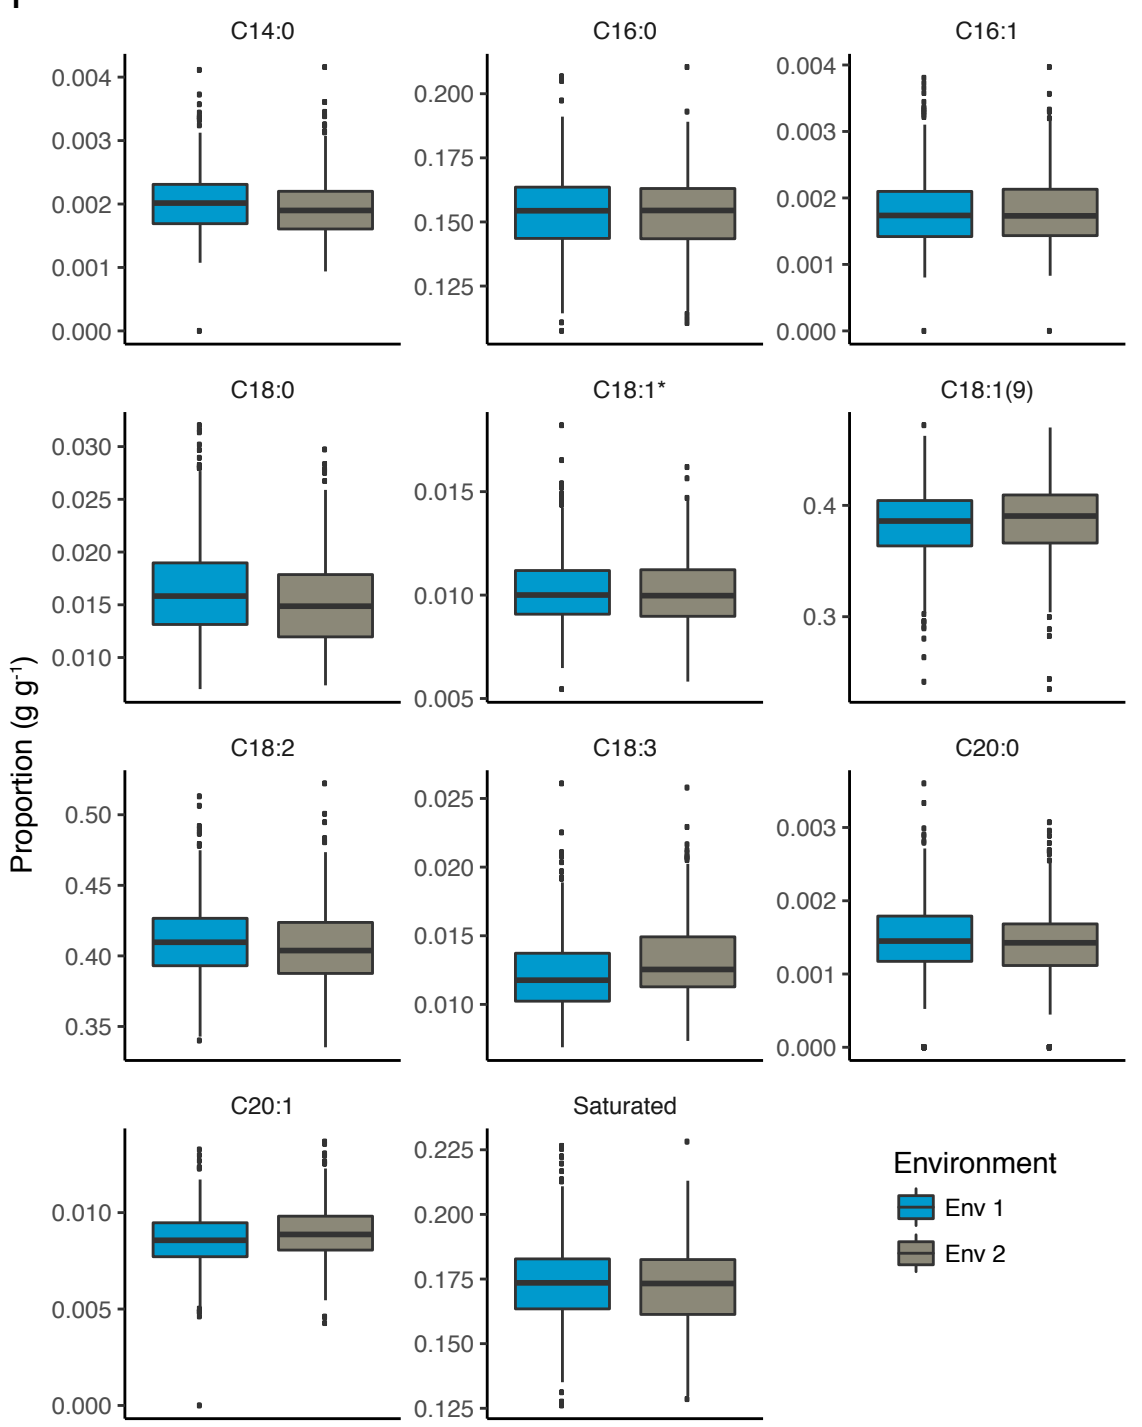

Supplement: Supplementary file [file 1]
