# Supplementary material
Source: publisher figshare collection journal article supplement (https://gsajournals.figshare.com/articles/dataset/_/7889747)
Supplement: Supplementary file [file 1]

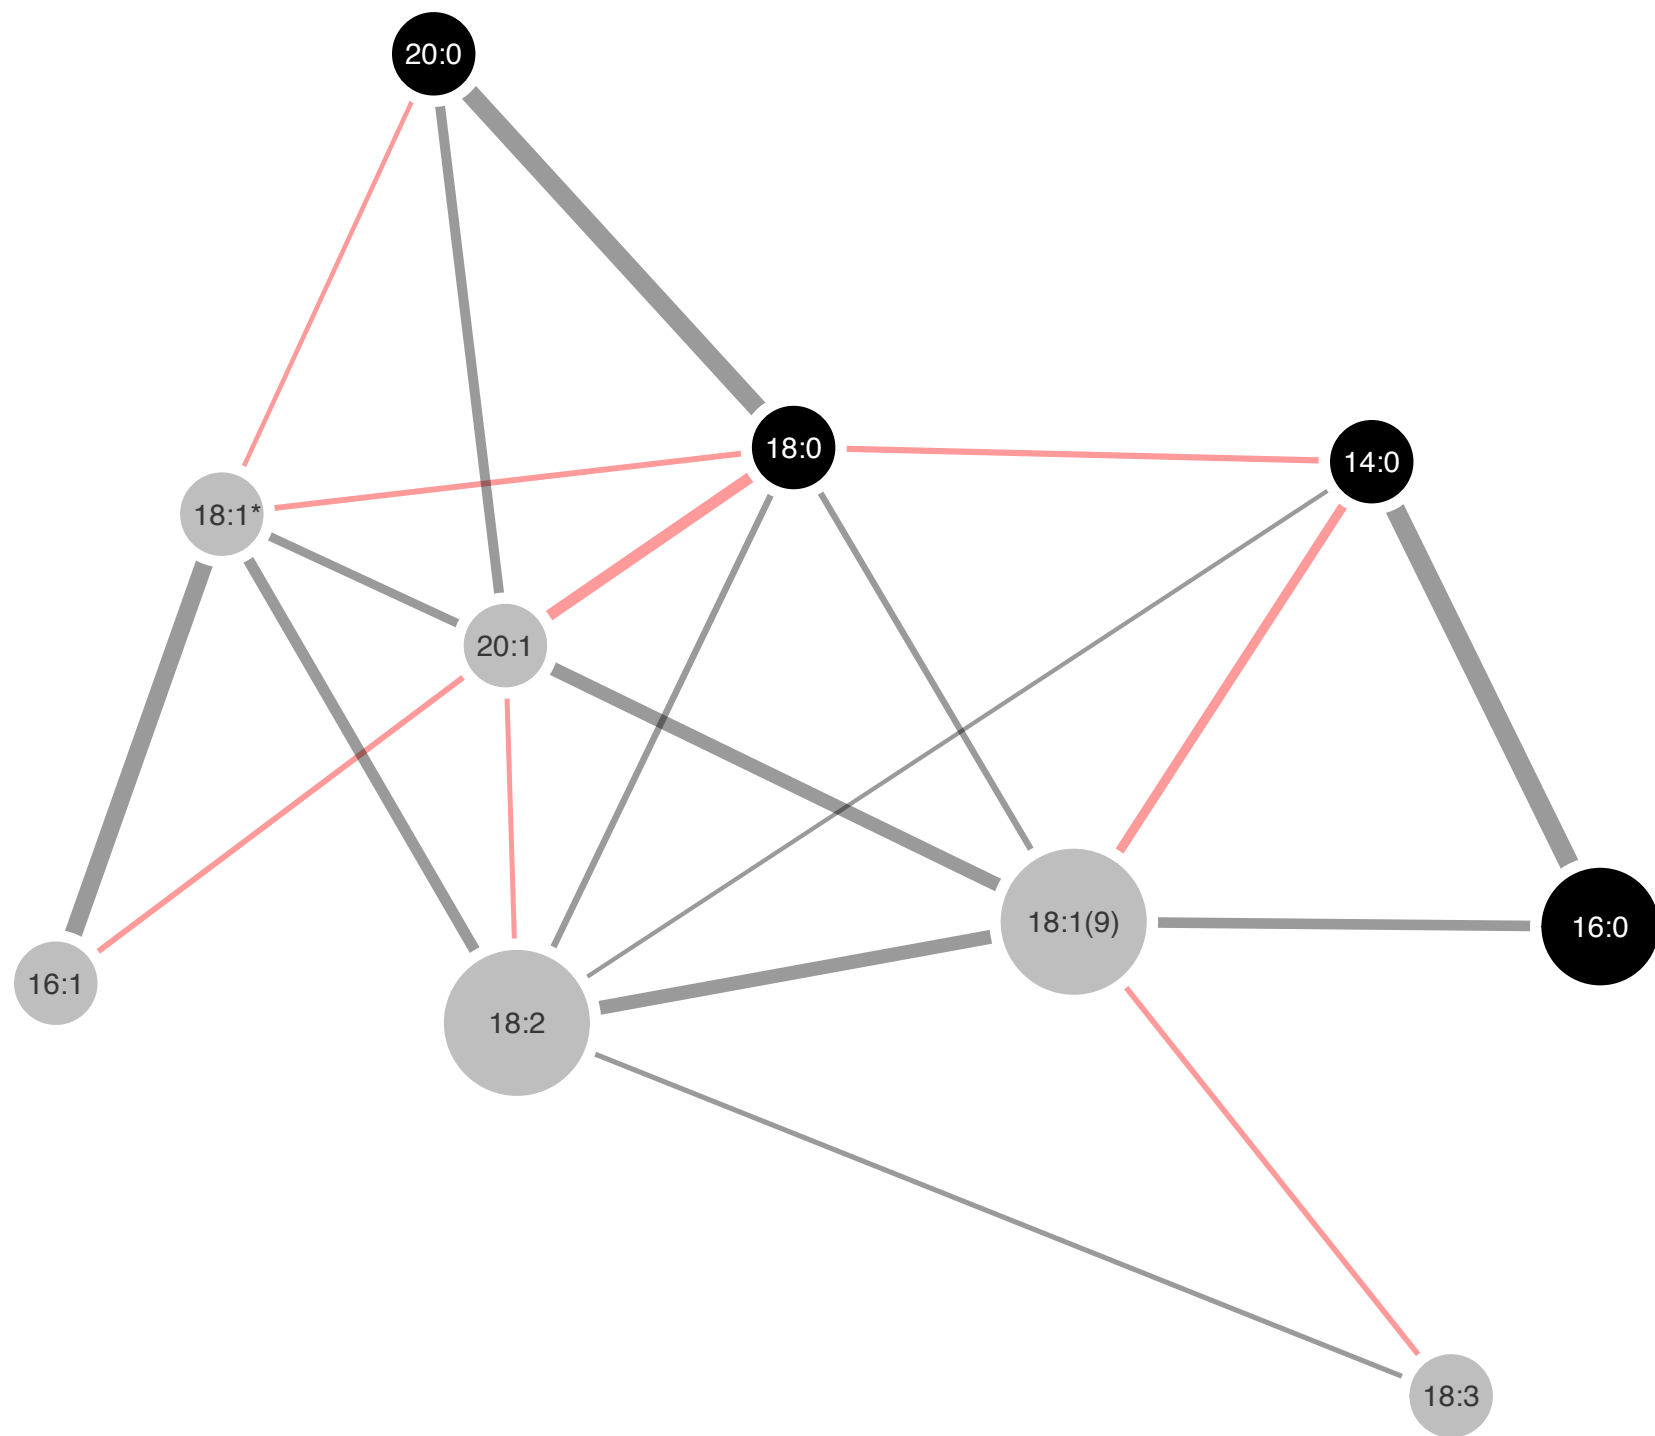

Concentration (mg g<sup>-1</sup>)  < 1  < 10  < 25 Correlation  -  + Weight  0.2  0.4  0.6  0.8  1.0
